# Supplementary material for: PARK7/DJ-1 deficiency impairs microglial activation in response to LPS-induced inflammation
Source: J Neuroinflammation. 2024 Jul 16;21:174. doi: 10.1186/s12974-024-03164-x (PMC11253405; doi:10.1186/s12974-024-03164-x)
Supplement: Supplementary file 9 — Supplementary Material 9. [file 12974_2024_3164_MOESM9_ESM.xlsx]

## Sheet: DEGs
Table S6
Up- and down-regulated genes (adjusted p-value < 0.05, |log2FC| ≥ 0.5) in iPSC-derived microglia-like cells
DEGs up DJ-1 Mut vs CTR	DEGs down DJ-1 Mut vs CTR	DEGs up DJ-1 Mut LPS vs CTR LPS	DEGs down DJ-1 Mut LPS vs CTR LPS
ME3	CSRP1	SPOCD1	CSRP1
CLMP	RWDD2B	ME3	RWDD2B
SPOCD1	S100A6	EPB41L1	S100A6
COL4A2	NLRP2	ZNF827	ZNF469
COL4A1	ZNF469	KALRN	NLRP2
KALRN	PCDHGA3	RPS6KL1	ACOD1
EPB41L1	COMT	CLMP	COMT
MCOLN3	TP53	PHLPP1	PTPN2
CAPN3	TXNRD2	LRRC75A	PCDHGA3
CLC	POU2F2	WFS1	CASP4
ZNF827	TLR8	DCLK2	ARHGAP24
ADAM8	ZNF132	ADAM8	TCHH
ACOT1	PCDHGA10	ACOT4	MAOA
RAB44	MAOA	DHRS11	ENPP2
LOXL4	DNAJA4	AL031123.1	DNAJA4
NMB	TYMP	ACOT1	GABRG2
CPA4	ENPP2	ZBTB7C	PCDHGA10
PIEZO2	TIFAB	TMEM154	TLR8
CLIC6	TNFRSF18	AL157778.1	TXNRD2
AFF3	PTGR1	CLIC6	PELI1
ZNF334	GABRG2	ZNF443	MARCHF9
COL6A3	IL7R	TFCP2L1	NAMPT
GLI3	IL21R	SHC3	SLC25A28
SYNE2	C1orf122	PDE6G	IL10
TCN1	CCR5	MLPH	ADM
MLPH	AC012645.1	GLCCI1	KIAA1217
HDC	PDE4B	FNDC5	LIMK2
RAB6B	MX1	RAB6B	PDE12
TSPAN12	CD14	SLAMF9	CCR5
DYRK1B	CEBPD	FHL1	SP100
HTRA1	ARHGAP24	BAIAP2-DT	NAMPTP1
PCDHGB5	MAP1LC3A	NMB	EPB41L3
FLNC	SOD2	MCOLN3	CD163
SHC3	TLE4	HTRA1	PNRC1
ISLR	CCDC125	SYNE2	PTCHD4
FBN2	TNFAIP6	ARVCF	PNPT1
AL353150.1	LPAR1	ELFN1	N4BP1
SLAMF9	HS3ST3B1	EEPD1	HIF1A
MEP1A	PTAFR	SLC29A2	OAS3
TFCP2L1	S100A12	SLC16A13	ZFP36
IFNLR1	CLEC10A	AL035665.1	GBP1
AKAP12	TLR7	CLC	IL7R
FNDC5	S100A9	CD22	PDE4B
AL157778.1	TFAP2A	SLC45A3	TRIM22
MMP16	RNF175	CD6	RGL1
CPA3	EDNRB	YPEL4	ETS1
CALD1	GCH1	LINC01547	BMP6
FBXL2	EBI3	CAPN3	SAT1
CD248	TNIP3	RGL3	PTGR1
PXDN	ACOD1	KRT79	ATP13A3
SLC15A1	HTR7	KCP	TSPAN33
THRB	PDCD1LG2	RAB44	SLC25A37
TMEM154	SHE	MEP1A	ENTPD7
SIX1	LYN	COL4A1	PLSCR1
FBN1	MCOLN2	FAM187B2P	TLR7
ADAMTS5	FKBP5	ZBED3-AS1	TP53
HMCN1	TICAM1	FAM86B3P	WNT5A-AS1
CTHRC1	STEAP3	WDR91	CCDC85A
PCDH9	OAS3	RIMS3	STOM
ROR2	GADD45G	SPON2	LDLRAD3
SIGLEC6	CD163	PNPLA3	C2CD4B
PLOD2	RGL1	ZC3HAV1L	HEY1
MEST	WNT5A	SIGLEC6	CPM
BOC	IL4I1	TSPEAR-AS1	FZD5
FHL1	SRGN	LINC02185	ADGRE1
ALKAL2	VNN2	LRRC10B	CD274
KRT79	GPR84	THRB	PDCD1LG2
COL13A1	TNFAIP8	CPA3	MAP1LC3A
PDE6G	GBP1	CCDC24	FPR1
TEAD2	SIGLEC10	AC091182.1	SLC16A10
MME	PURPL	SOX9	LAP3
PTPN14	FPR1	FUT8-AS1	PARP14
ELFN1	SAT1	ITGA11	TYMP
TSPEAR-AS1	TLR2	AP000920.1	ZNF132
FRAS1	HLA-F	ERVMER34-1	AQP9
AC092535,5	PRRT3-AS1	PANK1	CLEC10A
ZBED3-AS1	LYSMD2	SIGLEC8	SLC9B2
LAMA1	STEAP4	CYGB	SLC1A3
COL12A1	EPSTI1	MME	RAPGEF2
THBS2	LILRB2	FAM189A2	TBC1D9
KLF12	NFKBIA	KDR	TRAF3IP2
TPM2	SMAGP	TMEM266	WNT5A
THY1	P2RY6	PCDHGB5	EPHA2
SYNPO	CGAS		HLA-F
CILP	SECTM1		PDP1
LINC02575	ADA		HERC6
MS4A3	ADAMTS14		ELL
MYH10	ADORA2A		LILRB2
CD244	EDA2R		CCDC50
MOXD1	S100A8		PTGS2
GDF6	LHX2		SRGN
KRT8	PCDHA3		CR1
GFRA1	C15orf48		PNPLA8
PCDH7	PTCHD4		SERPINB9
GJC1			TBX3
IL5RA			SECTM1
CAV2			SPTBN5
NTRK3			DSE
AL031595.1			GRAMD1A
FOXP2			S100A12
RHEX			TNIP3
NRK			BATF
EPHB4			ZNRF2
			NOCT
			STEAP3
			AC007743.1
			IFI44
			MAP3K7CL
			MX2
			DCUN1D3
			VNN2
			PFKFB3
			ADA
			RNF213
			IL10RA
			DDX60
			XRN1
			MXD1
			LYSMD2
			FPR2
			MMP10
			FAM20A
			TICAM1
			MX1
			FBXO6
			IRF7
			PLAGL2
			LINC00884
			NKX3-1
			SLC7A2
			PURPL
			P2RY6
			SLAMF7
			HEG1
			DHX58
			PDGFRL
			CEBPD
			IL1RAP
			TRIM5
			OAS2
			CYRIA
			AVIL
			SIGLEC1
			C1S
			OAS1
			SP110
			EPSTI1
			HS3ST1
			HES4
			ZC3H11A
			MARCHF3
			CCR7
			S100A9
			C1orf21
			PTGIR
			SOCS3
			TNIP1
			CFH
			HTR7
			SAMSN1
			NHS
			RND1
			CEMIP2
			CD14
			GADD45B
			IL7
			AMIGO2
			CFB
			EBI3
			IFI35
			ZC3H12A
			SIGLEC10
			AL672207.1
			CXCL6
			GPR84
			GK
			SOCS2
			AC012313.5
			HERC5
			BATF3
			IL15RA
			BASP1
			SBNO2
			PARP9
			TNFAIP6
			IFI6
			CGAS
			CCDC125
			HS3ST3B1
			FOXP1
			IL3RA
			RIN2
			SAMD9L
			FSD1L
			SMIM3
			PPA1
			TLR2
			NSUN7
			RNF19B
			IFI16
			DDIT4
			IL21R
			EIF2AK2
			MRPS24
			MAP3K5-AS1
			AZIN1-AS1

## Sheet: DJ-1 Mut vs CTR up BP
Term		Count	%	PValue	Genes	List Total	Pop Hits	Pop Total	Fold Enrichment	Bonferroni	Benjamini	FDR
GO:0007155	cell adhesion	13	13.1313	1.80641e-05	PCDHGB5, PCDH9, LAMA1, PCDH7, COL12A1, THY1, THBS2, ISLR, PXDN, COL6A3, MYH10, EPHB4, SIGLEC6	95	567	19462	4.69704	0.011691	0.0115379	0.0114847
GO:0030199	collagen fibril organization	6	6.06061	3.54466e-05	COL4A2, COL13A1, COL4A1, COL12A1, PXDN, LOXL4	95	77	19462	15.9634	0.0228119	0.0115379	0.0114847
GO:0071711	basement membrane organization	4	4.0404	0.000157211	COL4A1, CAV2, PXDN, HMCN1	95	22	19462	37.2478	0.0972885	0.0341148	0.0339575
GO:0001525	angiogenesis	7	7.07071	0.00148465	COL4A2, CALD1, PXDN, ADAM8, THY1, TSPAN12, EPHB4	95	255	19462	5.62369	0.619862	0.219136	0.218126
GO:0006508	proteolysis	9	9.09091	0.00168307	CPA3, ADAMTS5, MMP16, MME, HTRA1, CAPN3, ADAM8, FBXL2, CPA4	95	458	19462	4.0257	0.665997	0.219136	0.218126
GO:0030198	extracellular matrix organization	6	6.06061	0.00228932	ADAMTS5, COL4A2, MMP16, COL13A1, COL4A1, PXDN	95	190	19462	6.46936	0.77509	0.248391	0.247246
GO:0007169	transmembrane receptor protein tyrosine kinase signaling pathway	5	5.05051	0.00439404	SHC3, NTRK3, ALKAL2, ROR2, EPHB4	95	137	19462	7.47676	0.943121	0.408646	0.406763
GO:0001656	metanephros development	3	3.0303	0.00919491	GDF6, GLI3, FBN1	95	30	19462	20.4863	0.997555	0.729746	0.726383
GO:0007156	homophilic cell adhesion via plasma membrane adhesion molecules	5	5.05051	0.0100887	PCDHGB5, PCDH9, PCDH7, ME3, HMCN1	95	174	19462	5.88687	0.998641	0.729746	0.726383
GO:0038179	neurotrophin signaling pathway	2	2.0202	0.0144206	NTRK3, GFRA1	95	3	19462	136.575	0.999922	0.80028	0.796592
GO:0001890	placenta development	3	3.0303	0.0144934	FBN2, MME, HTRA1	95	38	19462	16.1734	0.999925	0.80028	0.796592
GO:0007411	axon guidance	5	5.05051	0.0148036	LAMA1, BOC, KALRN, GLI3, EPHB4	95	195	19462	5.2529	0.999939	0.80028	0.796592
GO:0045214	sarcomere organization	3	3.0303	0.015981	KRT8, CAPN3, FLNC	95	40	19462	15.3647	0.999972	0.80028	0.796592
GO:0035583	sequestering of TGFbeta in extracellular matrix	2	2.0202	0.0191816	FBN2, FBN1	95	4	19462	102.432	0.999997	0.866722	0.862728
GO:0043010	camera-type eye development	3	3.0303	0.0199705	FBN2, LAMA1, FBN1	95	45	19462	13.6575	0.999998	0.866722	0.862728
GO:0007275	multicellular organism development	4	4.0404	0.0326337	NTRK3, ROR2, CLC, EPHB4	95	144	19462	5.69064	1	1	0.996923
GO:0002693	positive regulation of cellular extravasation	2	2.0202	0.0333286	ADAM8, THY1	95	7	19462	58.5323	1	1	0.996923
GO:0061304	retinal blood vessel morphogenesis	2	2.0202	0.0333286	COL4A1, LAMA1	95	7	19462	58.5323	1	1	0.996923
GO:0071560	cellular response to transforming growth factor beta stimulus	3	3.0303	0.0450908	COL4A2, CILP, FBN1	95	70	19462	8.77985	1	1	0.996923
GO:0048048	embryonic eye morphogenesis	2	2.0202	0.0472736	FBN2, FBN1	95	10	19462	40.9726	1	1	0.996923
GO:0033674	positive regulation of kinase activity	3	3.0303	0.0474306	NTRK3, ROR2, EPHB4	95	72	19462	8.53596	1	1	0.996923
GO:0043410	positive regulation of MAPK cascade	4	4.0404	0.0507371	CAV2, PDE6G, NTRK3, ROR2	95	172	19462	4.76426	1	1	0.996923
GO:0038063	collagen-activated tyrosine kinase receptor signaling pathway	2	2.0202	0.0518775	COL4A2, COL4A1	95	11	19462	37.2478	1	1	0.996923
GO:0045669	positive regulation of osteoblast differentiation	3	3.0303	0.05224	FBN2, GLI3, CTHRC1	95	76	19462	8.0867	1	1	0.996923
GO:0030903	notochord development	2	2.0202	0.0564595	COL13A1, TEAD2	95	12	19462	34.1439	1	1	0.996923
GO:0046549	retinal cone cell development	2	2.0202	0.0564595	THRB, THY1	95	12	19462	34.1439	1	1	0.996923
GO:0016485	protein processing	3	3.0303	0.0649731	MMP16, MME, GLI3	95	86	19462	7.14639	1	1	0.996923
GO:0007224	smoothened signaling pathway	3	3.0303	0.0662988	BOC, ROR2, GLI3	95	87	19462	7.06425	1	1	0.996923
GO:0006936	muscle contraction	3	3.0303	0.0689772	GJC1, CALD1, TPM2	95	89	19462	6.9055	1	1	0.996923
GO:0098609	cell-cell adhesion	4	4.0404	0.0693813	COL13A1, BOC, ADAM8, THY1	95	196	19462	4.18088	1	1	0.996923
GO:0090336	positive regulation of brown fat cell differentiation	2	2.0202	0.0745692	FNDC5, SIX1	95	16	19462	25.6079	1	1	0.996923
GO:0007517	muscle organ development	3	3.0303	0.0872064	FHL1, CAPN3, COL6A3	95	102	19462	6.02539	1	1	0.996923
GO:0048514	blood vessel morphogenesis	2	2.0202	0.092335	COL4A1, LAMA1	95	20	19462	20.4863	1	1	0.996923
GO:0048665	neuron fate specification	2	2.0202	0.0967235	NTRK3, SIX1	95	21	19462	19.5108	1	1	0.996923
GO:0032332	positive regulation of chondrocyte differentiation	2	2.0202	0.0967235	GDF6, GLI3	95	21	19462	19.5108	1	1	0.996923

## Sheet: DJ-1 Mut vs CTR down BP
Term		Count	%	PValue	Genes	List Total	Pop Hits	Pop Total	Fold Enrichment	Bonferroni	Benjamini	FDR
GO:0006954	inflammatory response	17	18.2796	4.0085e-11	TNFAIP6, WNT5A, PTAFR, FPR1, ACOD1, TICAM1, ADORA2A, TNIP3, NLRP2, S100A12, TLR8, TLR7, CD14, CCR5, S100A9, S100A8, TLR2	84	436	19462	9.0338	4.27707e-08	4.27707e-08	4.1969e-08
GO:0045087	innate immune response	17	18.2796	9.28452e-09	LYN, CLEC10A, MX1, SIGLEC10, CGAS, TICAM1, MCOLN2, OAS3, NLRP2, S100A12, TLR8, TLR7, CD14, S100A9, GBP1, S100A8, TLR2	84	635	19462	6.20274	9.90654e-06	4.95329e-06	4.86045e-06
GO:0031663	lipopolysaccharide-mediated signaling pathway	7	7.52688	2.32331e-08	LYN, NFKBIA, TIFAB, PTAFR, CD14, TICAM1, TLR2	84	42	19462	38.6151	2.47894e-05	8.26324e-06	8.10835e-06
GO:0071222	cellular response to lipopolysaccharide	10	10.7527	1.67108e-07	EDNRB, TNIP3, WNT5A, PDE4B, ACOD1, LILRB2, CD14, PDCD1LG2, CCR5, TICAM1	84	198	19462	11.7015	0.000178288	4.4576e-05	4.37405e-05
GO:0032755	positive regulation of interleukin-6 production	8	8.60215	3.22378e-07	WNT5A, PTAFR, TLR8, TLR7, LILRB2, TICAM1, POU2F2, TLR2	84	105	19462	17.6526	0.000343918	6.87954e-05	6.75059e-05
GO:0006915	apoptotic process	14	15.0538	2.09646e-06	SRGN, STEAP3, TNFAIP8, TNFRSF18, MX1, GADD45G, NFKBIA, ADORA2A, NLRP2, CD14, S100A9, TP53, S100A8, TLR2	84	620	19462	5.23172	0.00223442	0.00037282	0.000365832
GO:0051607	defense response to virus	9	9.67742	7.48804e-06	OAS3, MX1, ACOD1, CGAS, TLR8, TLR7, TICAM1, GBP1, TLR2	84	236	19462	8.83565	0.00795794	0.00104245	0.00102291
GO:0007249	I-kappaB kinase/NF-kappaB signaling	6	6.45161	7.81594e-06	NFKBIA, TIFAB, EDNRB, TLR8, TLR7, TICAM1	84	64	19462	21.721	0.00830497	0.00104245	0.00102291
GO:0050729	positive regulation of inflammatory response	7	7.52688	9.2527e-06	NFKBIA, WNT5A, S100A12, TLR7, S100A9, S100A8, TLR2	84	114	19462	14.2266	0.0098241	0.00109696	0.0010764
GO:0032729	positive regulation of interferon-gamma production	6	6.45161	2.19763e-05	WNT5A, EBI3, PDE4B, TLR8, TLR7, CD14	84	79	19462	17.5967	0.0231762	0.00234487	0.00230092
GO:0032728	positive regulation of interferon-beta production	5	5.37634	3.34347e-05	OAS3, TLR8, TLR7, TICAM1, TLR2	84	43	19462	26.9408	0.0350466	0.00324317	0.00318238
GO:0051092	positive regulation of NF-kappaB transcription factor activity	7	7.52688	7.21639e-05	WNT5A, S100A12, TICAM1, S100A9, EDA2R, S100A8, TLR2	84	164	19462	9.88923	0.0741117	0.00641658	0.0062963
GO:0032760	positive regulation of tumor necrosis factor production	6	6.45161	9.8688e-05	OAS3, WNT5A, PTAFR, CD14, TICAM1, TLR2	84	108	19462	12.8717	0.0999503	0.00810001	0.00794818
GO:0032757	positive regulation of interleukin-8 production	5	5.37634	0.000170815	WNT5A, TLR8, TLR7, CD14, TLR2	84	65	19462	17.8223	0.166628	0.0128866	0.012645
GO:0034142	toll-like receptor 4 signaling pathway	4	4.30108	0.000181161	LYN, NFKBIA, TNIP3, CD14	84	26	19462	35.6447	0.175779	0.0128866	0.012645
GO:0002224	toll-like receptor signaling pathway	4	4.30108	0.000226863	TLR8, TLR7, TICAM1, TLR2	84	28	19462	33.0986	0.215014	0.0151289	0.0148453
GO:0071219	cellular response to molecule of bacterial origin	3	3.22581	0.000494837	WNT5A, ACOD1, CD14	84	8	19462	86.8839	0.410288	0.0310583	0.0304761
GO:0007200	phospholipase C-activating G-protein coupled receptor signaling pathway	5	5.37634	0.000729035	P2RY6, EDNRB, PTAFR, FPR1, LPAR1	84	95	19462	12.1942	0.540752	0.0432156	0.0424056
GO:0032722	positive regulation of chemokine production	4	4.30108	0.000932671	WNT5A, TLR7, TICAM1, TLR2	84	45	19462	20.5947	0.630507	0.0514267	0.0504627
GO:0070242	thymocyte apoptotic process	3	3.22581	0.000963949	WNT5A, TP53, ADA	84	11	19462	63.1883	0.642647	0.0514267	0.0504627
GO:0007165	signal transduction	15	16.129	0.00121262	LYN, TNFAIP6, TNFRSF18, MX1, FPR1, SECTM1, LILRB2, GABRG2, ARHGAP24, TYMP, S100A6, PDE4B, CCR5, IL7R, TLR2	84	1310	19462	2.65294	0.726006	0.0616126	0.0604577
GO:0006955	immune response	9	9.67742	0.00152216	PTAFR, ENPP2, SECTM1, LILRB2, PDCD1LG2, CCR5, IL7R, HLA-F, TLR2	84	512	19462	4.07268	0.803164	0.0733771	0.0720017
GO:0010035	response to inorganic substance	3	3.22581	0.0015817	ADORA2A, TP53, ADA	84	14	19462	49.648	0.815297	0.0733771	0.0720017
GO:0006935	chemotaxis	5	5.37634	0.00201503	PTAFR, ENPP2, FPR1, CCR5, TYMP	84	125	19462	9.26762	0.883773	0.0895849	0.0879057
GO:0032496	response to lipopolysaccharide	5	5.37634	0.0037962	GCH1, SOD2, S100A9, S100A8, TLR2	84	149	19462	7.77485	0.982721	0.162022	0.158985
GO:0033209	tumor necrosis factor-mediated signaling pathway	4	4.30108	0.00468449	NFKBIA, TNFRSF18, TP53, EDA2R	84	79	19462	11.7312	0.99333	0.191752	0.188157
GO:0002244	hematopoietic progenitor cell differentiation	4	4.30108	0.0048522	LYN, TIFAB, CEBPD, TP53	84	80	19462	11.5845	0.994427	0.191752	0.188157
GO:0060907	positive regulation of macrophage cytokine production	3	3.22581	0.00505824	WNT5A, TLR7, TICAM1	84	25	19462	27.8029	0.995532	0.192755	0.189142
GO:0030593	neutrophil chemotaxis	4	4.30108	0.00537693	PDE4B, S100A12, S100A9, S100A8	84	83	19462	11.1658	0.996826	0.197834	0.194126
GO:0050900	leukocyte migration	3	3.22581	0.00632086	LYN, PDE4B, ADA	84	28	19462	24.824	0.998847	0.224812	0.220598
GO:0070488	neutrophil aggregation	2	2.15054	0.00851147	S100A9, S100A8	84	2	19462	231.69	0.999891	0.292959	0.287468
GO:0071346	cellular response to interferon-gamma	4	4.30108	0.008986	WNT5A, ACOD1, GBP1, TLR2	84	100	19462	9.26762	0.999934	0.298347	0.292755
GO:0032481	positive regulation of type I interferon production	3	3.22581	0.00922723	CGAS, CD14, TICAM1	84	34	19462	20.4433	0.999949	0.298347	0.292755
GO:0050832	defense response to fungus	3	3.22581	0.0103053	S100A12, S100A9, S100A8	84	36	19462	19.3075	0.999984	0.323404	0.317342
GO:2001244	positive regulation of intrinsic apoptotic signaling pathway	3	3.22581	0.0108642	TP53, S100A9, S100A8	84	37	19462	18.7857	0.999991	0.331204	0.324996
GO:0043123	positive regulation of I-kappaB kinase/NF-kappaB signaling	5	5.37634	0.0115016	LPAR1, S100A12, SECTM1, TICAM1, EDA2R	84	205	19462	5.65099	0.999996	0.340896	0.334506
GO:0033077	T cell differentiation in thymus	3	3.22581	0.0126195	IL7R, TP53, ADA	84	40	19462	17.3768	0.999999	0.357365	0.350667
GO:0071727	cellular response to triacyl bacterial lipopeptide	2	2.15054	0.0127403	CD14, TLR2	84	3	19462	154.46	0.999999	0.357365	0.350667
GO:0007166	cell surface receptor signaling pathway	6	6.45161	0.0132958	EDNRB, LILRB2, CD14, PDCD1LG2, CCR5, IL7R	84	329	19462	4.22536	0.999999	0.357365	0.350667
GO:0002250	adaptive immune response	7	7.52688	0.013397	LYN, IL4I1, CLEC10A, SIGLEC10, LILRB2, PDCD1LG2, MCOLN2	84	457	19462	3.54887	0.999999	0.357365	0.350667
GO:0042100	B cell proliferation	3	3.22581	0.0164717	TICAM1, IL7R, ADA	84	46	19462	15.1102	1	0.418459	0.410615
GO:0042311	vasodilation	3	3.22581	0.0164717	EDNRB, GCH1, ADORA2A	84	46	19462	15.1102	1	0.418459	0.410615
GO:0032119	sequestering of zinc ion	2	2.15054	0.0169514	S100A9, S100A8	84	4	19462	115.845	1	0.42063	0.412746
GO:0007267	cell-cell signaling	5	5.37634	0.0178717	ADORA2A, TNFAIP6, LILRB2, CCR5, S100A9	84	234	19462	4.95065	1	0.433389	0.425266
GO:0042130	negative regulation of T cell proliferation	3	3.22581	0.0185625	IL4I1, LILRB2, PDCD1LG2	84	49	19462	14.1851	1	0.440137	0.431887
GO:0070245	positive regulation of thymocyte apoptotic process	2	2.15054	0.0211447	WNT5A, TP53	84	5	19462	92.6762	1	0.451227	0.442769
GO:0071726	cellular response to diacyl bacterial lipopeptide	2	2.15054	0.0211447	CD14, TLR2	84	5	19462	92.6762	1	0.451227	0.442769
GO:0051964	negative regulation of synapse assembly	2	2.15054	0.0211447	WNT5A, TLR2	84	5	19462	92.6762	1	0.451227	0.442769
GO:0002774	Fc receptor mediated inhibitory signaling pathway	2	2.15054	0.0211447	LYN, LILRB2	84	5	19462	92.6762	1	0.451227	0.442769
GO:0018119	peptidyl-cysteine S-nitrosylation	2	2.15054	0.0211447	S100A9, S100A8	84	5	19462	92.6762	1	0.451227	0.442769
GO:0010628	positive regulation of gene expression	7	7.52688	0.0234737	TFAP2A, DNAJA4, WNT5A, TICAM1, IL7R, TP53, TLR2	84	519	19462	3.12492	1	0.489323	0.480151
GO:0006968	cellular defense response	3	3.22581	0.0238471	ADORA2A, LILRB2, CCR5	84	56	19462	12.412	1	0.489323	0.480151
GO:0001932	regulation of protein phosphorylation	3	3.22581	0.0246468	LYN, TLR8, TLR7	84	57	19462	12.1942	1	0.496192	0.486891
GO:0042742	defense response to bacterium	5	5.37634	0.0254616	OAS3, S100A12, S100A9, GBP1, S100A8	84	261	19462	4.43851	1	0.502294	0.492879
GO:0050728	negative regulation of inflammatory response	4	4.30108	0.0258914	ADORA2A, TNFAIP6, ACOD1, ADA	84	149	19462	6.21988	1	0.502294	0.492879
GO:0043066	negative regulation of apoptotic process	7	7.52688	0.028245	TFAP2A, TNFAIP8, EDNRB, TNFRSF18, WNT5A, SOD2, TP53	84	542	19462	2.99231	1	0.515628	0.505963
GO:0007204	positive regulation of cytosolic calcium ion concentration	4	4.30108	0.0286485	EDNRB, FPR1, LPAR1, CCR5	84	155	19462	5.97911	1	0.515628	0.505963
GO:0034136	negative regulation of toll-like receptor 2 signaling pathway	2	2.15054	0.0294783	LYN, ACOD1	84	7	19462	66.1973	1	0.515628	0.505963
GO:0035425	autocrine signaling	2	2.15054	0.0294783	S100A9, S100A8	84	7	19462	66.1973	1	0.515628	0.505963
GO:0015677	copper ion import	2	2.15054	0.0294783	STEAP3, STEAP4	84	7	19462	66.1973	1	0.515628	0.505963
GO:0021559	trigeminal nerve development	2	2.15054	0.0294783	TFAP2A, TIFAB	84	7	19462	66.1973	1	0.515628	0.505963
GO:0009410	response to xenobiotic stimulus	5	5.37634	0.0307522	LYN, ADORA2A, TXNRD2, SOD2, TP53	84	277	19462	4.18214	1	0.52606	0.516199
GO:0019221	cytokine-mediated signaling pathway	4	4.30108	0.0310607	EBI3, IL21R, LILRB2, IL7R	84	160	19462	5.79226	1	0.52606	0.516199
GO:0032731	positive regulation of interleukin-1 beta production	3	3.22581	0.0332259	WNT5A, NLRP2, TLR8	84	67	19462	10.3742	1	0.543504	0.533316
GO:0042135	neurotransmitter catabolic process	2	2.15054	0.0336188	MAOA, COMT	84	8	19462	57.9226	1	0.543504	0.533316
GO:0014074	response to purine-containing compound	2	2.15054	0.0336188	ADORA2A, ADA	84	8	19462	57.9226	1	0.543504	0.533316
GO:0006909	phagocytosis	3	3.22581	0.0369393	P2RY6, ADORA2A, CD14	84	71	19462	9.78974	1	0.577576	0.56675
GO:0002544	chronic inflammatory response	2	2.15054	0.0377418	S100A9, S100A8	84	9	19462	51.4868	1	0.577576	0.56675
GO:0051248	negative regulation of protein metabolic process	2	2.15054	0.0377418	EDNRB, LILRB2	84	9	19462	51.4868	1	0.577576	0.56675
GO:1901224	positive regulation of NIK/NF-kappaB signaling	3	3.22581	0.0378916	TLR7, CD14, TLR2	84	72	19462	9.65377	1	0.577576	0.56675
GO:0001817	regulation of cytokine production	3	3.22581	0.0388533	LYN, TLR8, TLR2	84	73	19462	9.52153	1	0.583894	0.572949
GO:0048806	genitalia development	2	2.15054	0.0418475	TIFAB, WNT5A	84	10	19462	46.3381	1	0.611661	0.600196
GO:0007252	I-kappaB phosphorylation	2	2.15054	0.0418475	TLR7, TLR2	84	10	19462	46.3381	1	0.611661	0.600196
GO:0033089	positive regulation of T cell differentiation in thymus	2	2.15054	0.0459358	IL7R, ADA	84	11	19462	42.1255	1	0.644915	0.632827
GO:0042420	dopamine catabolic process	2	2.15054	0.0459358	MAOA, COMT	84	11	19462	42.1255	1	0.644915	0.632827
GO:0071223	cellular response to lipoteichoic acid	2	2.15054	0.0459358	CD14, TLR2	84	11	19462	42.1255	1	0.644915	0.632827
GO:0008285	negative regulation of cell proliferation	6	6.45161	0.0475061	LYN, TFAP2A, ADORA2A, SOD2, TP53, TLR2	84	462	19462	3.00897	1	0.658299	0.64596
GO:0008217	regulation of blood pressure	3	3.22581	0.0489651	EDNRB, GCH1, SOD2	84	83	19462	8.37435	1	0.669818	0.657263
GO:0035589	G-protein coupled purinergic nucleotide receptor signaling pathway	2	2.15054	0.0540609	P2RY6, PTAFR	84	13	19462	35.6447	1	0.703451	0.690266
GO:0010269	response to selenium ion	2	2.15054	0.0540609	TXNRD2, SOD2	84	13	19462	35.6447	1	0.703451	0.690266
GO:0002523	leukocyte migration involved in inflammatory response	2	2.15054	0.0540609	S100A9, S100A8	84	13	19462	35.6447	1	0.703451	0.690266
GO:0035815	positive regulation of renal sodium excretion	2	2.15054	0.0540609	EDNRB, ADORA2A	84	13	19462	35.6447	1	0.703451	0.690266
GO:0035810	positive regulation of urine volume	2	2.15054	0.0580978	EDNRB, ADORA2A	84	14	19462	33.0986	1	0.746696	0.732699
GO:0019722	calcium-mediated signaling	3	3.22581	0.0587839	EDNRB, CCR5, ADA	84	92	19462	7.55512	1	0.746696	0.732699
GO:0032088	negative regulation of NF-kappaB transcription factor activity	3	3.22581	0.0610515	NFKBIA, NLRP2, ACOD1	84	94	19462	7.39438	1	0.761833	0.747553
GO:0071639	positive regulation of monocyte chemotactic protein-1 production	2	2.15054	0.0621176	OAS3, MCOLN2	84	15	19462	30.8921	1	0.761833	0.747553
GO:0048265	response to pain	2	2.15054	0.0621176	EDNRB, GCH1	84	15	19462	30.8921	1	0.761833	0.747553
GO:0034144	negative regulation of toll-like receptor 4 signaling pathway	2	2.15054	0.0661205	LYN, ACOD1	84	16	19462	28.9613	1	0.783824	0.769131
GO:0006691	leukotriene metabolic process	2	2.15054	0.0661205	PTGR1, TLR2	84	16	19462	28.9613	1	0.783824	0.769131
GO:1904862	inhibitory synapse assembly	2	2.15054	0.0661205	WNT5A, GABRG2	84	16	19462	28.9613	1	0.783824	0.769131
GO:0046330	positive regulation of JNK cascade	3	3.22581	0.0668491	WNT5A, EDA2R, GADD45G	84	99	19462	7.02092	1	0.783824	0.769131
GO:0055093	response to hyperoxia	2	2.15054	0.0701065	TXNRD2, SOD2	84	17	19462	27.2577	1	0.813083	0.797843
GO:0045591	positive regulation of regulatory T cell differentiation	2	2.15054	0.0740757	IL4I1, LILRB2	84	18	19462	25.7434	1	0.84988	0.833949
GO:0014002	astrocyte development	2	2.15054	0.0780282	S100A9, S100A8	84	19	19462	24.3885	1	0.88449	0.867911
GO:0045944	positive regulation of transcription from RNA polymerase II promoter	10	10.7527	0.0787503	NFKBIA, TFAP2A, IL4I1, CEBPD, LHX2, WNT5A, TLR7, POU2F2, TP53, TLR2	84	1232	19462	1.8806	1	0.88449	0.867911
GO:0009615	response to virus	3	3.22581	0.0802075	OAS3, MX1, TLR8	84	110	19462	6.31883	1	0.891472	0.874763
GO:0042310	vasoconstriction	2	2.15054	0.081964	HTR7, EDNRB	84	20	19462	23.169	1	0.901604	0.884704
GO:2000774	positive regulation of cellular senescence	2	2.15054	0.0858832	CGAS, TP53	84	21	19462	22.0658	1	0.916374	0.899197
GO:0010460	positive regulation of heart rate	2	2.15054	0.0858832	GCH1, ADA	84	21	19462	22.0658	1	0.916374	0.899197
GO:0034755	iron ion transmembrane transport	2	2.15054	0.0858832	STEAP3, STEAP4	84	21	19462	22.0658	1	0.916374	0.899197
GO:0045807	positive regulation of endocytosis	2	2.15054	0.0897858	WNT5A, CD14	84	22	19462	21.0628	1	0.930112	0.912677
GO:0002755	MyD88-dependent toll-like receptor signaling pathway	2	2.15054	0.0897858	TLR8, TLR2	84	22	19462	21.0628	1	0.930112	0.912677
GO:0006939	smooth muscle contraction	2	2.15054	0.0897858	HTR7, ADA	84	22	19462	21.0628	1	0.930112	0.912677
GO:0006809	nitric oxide biosynthetic process	2	2.15054	0.093672	GCH1, TICAM1	84	23	19462	20.147	1	0.961039	0.943025
GO:0007155	cell adhesion	6	6.45161	0.0947321	PCDHGA10, TNFAIP6, PCDHGA3, SIGLEC10, PCDHA3, ADA	84	567	19462	2.45175	1	0.962659	0.944614
GO:0010976	positive regulation of neuron projection development	3	3.22581	0.0969507	LYN, WNT5A, S100A9	84	123	19462	5.65099	1	0.963677	0.945614
GO:0001836	release of cytochrome c from mitochondria	2	2.15054	0.0975419	SOD2, TP53	84	24	19462	19.3075	1	0.963677	0.945614
GO:2000378	negative regulation of reactive oxygen species metabolic process	2	2.15054	0.0975419	TFAP2A, TP53	84	24	19462	19.3075	1	0.963677	0.945614

## Sheet: DJ-1 Mut LPS vs CTR LPS up BP 
Term		Count	%	PValue	Genes	List Total	Pop Hits	Pop Total	Fold Enrichment	Bonferroni	Benjamini	FDR
GO:0001676	long-chain fatty acid metabolic process	3	3.8961	0.00492111	PNPLA3, ACOT1, ACOT4	61	34	19462	28.1514	0.930328	1	1
GO:0007155	cell adhesion	7	9.09091	0.00787342	SPON2, ARVCF, PCDHGB5, ITGA11, SIGLEC8, SIGLEC6, CD22	61	567	19462	3.93888	0.985997	1	1
GO:0002667	regulation of T cell anergy	2	2.5974	0.0122758	PHLPP1, CLC	61	4	19462	159.525	0.998732	1	1
GO:0098609	cell-cell adhesion	4	5.19481	0.0226212	ARVCF, ITGA11, ADAM8, SOX9	61	196	19462	6.51121	0.999996	1	1
GO:0060509	Type I pneumocyte differentiation	2	2.5974	0.0244033	THRB, SOX9	61	8	19462	79.7623	0.999998	1	1
GO:0002070	epithelial cell maturation	2	2.5974	0.030412	KDR, TFCP2L1	61	10	19462	63.8098	1	1	1
GO:0045927	positive regulation of growth	2	2.5974	0.0334027	WFS1, TFCP2L1	61	11	19462	58.0089	1	1	1
GO:0010463	mesenchymal cell proliferation	2	2.5974	0.039357	KDR, SOX9	61	13	19462	49.0845	1	1	1
GO:0007517	muscle organ development	3	3.8961	0.0395442	ITGA11, FHL1, CAPN3	61	102	19462	9.3838	1	1	1
GO:0006508	proteolysis	5	6.49351	0.0526404	CPA3, MME, HTRA1, CAPN3, ADAM8	61	458	19462	3.48307	1	1	1
GO:0000038	very long-chain fatty acid metabolic process	2	2.5974	0.0599141	ACOT1, ACOT4	61	20	19462	31.9049	1	1	1
GO:0002053	positive regulation of mesenchymal cell proliferation	2	2.5974	0.0714662	KDR, SOX9	61	24	19462	26.5874	1	1	1
GO:0006637	acyl-CoA metabolic process	2	2.5974	0.0743324	ACOT1, ACOT4	61	25	19462	25.5239	1	1	1
GO:0014850	response to muscle activity	2	2.5974	0.0771898	FNDC5, CAPN3	61	26	19462	24.5422	1	1	1
GO:0043524	negative regulation of neuron apoptotic process	3	3.8961	0.0900902	WFS1, KDR, ADAM8	61	163	19462	5.87207	1	1	1
GO:0001569	branching involved in blood vessel morphogenesis	2	2.5974	0.0941532	COL4A1, KDR	61	32	19462	19.9406	1	1	1
GO:0055074	calcium ion homeostasis	2	2.5974	0.0997392	WFS1, KDR	61	34	19462	18.7676	1	1	1

## Sheet: DJ-1 Mut LPS vs CTR LPS down BP
Term		Count	%	PValue	Genes	List Total	Pop Hits	Pop Total	Fold Enrichment	Bonferroni	Benjamini	FDR
GO:0051607	defense response to virus	26	12.9353	3.75806e-19	IFI6, CGAS, DDX60, HERC5, IFI16, TRIM5, ZC3H12A, DHX58, GBP1, TRIM22, MX2, MX1, ACOD1, EIF2AK2, PARP9, TICAM1, PLSCR1, OAS1, OAS2, PDE12, OAS3, DDIT4, IRF7, TLR8, TLR7, TLR2	187	236	19462	11.4659	6.44507e-16	6.44507e-16	6.33608e-16
GO:0006954	inflammatory response	29	14.4279	1.48914e-15	CXCL6, TRAF3IP2, TNFAIP6, FPR1, ADM, IL1RAP, FPR2, PTGS2, IFI16, CASP4, ZC3H12A, NLRP2, S100A12, CCR7, CD14, CCR5, PTGIR, WNT5A, ACOD1, TICAM1, BMP6, TNIP1, TNIP3, TLR8, TLR7, SIGLEC1, S100A9, EPHA2, TLR2	187	436	19462	6.92241	2.47524e-12	1.27694e-12	1.25535e-12
GO:0045087	innate immune response	33	16.4179	1.06416e-14	C1S, CLEC10A, IFI6, CGAS, IL1RAP, IFI35, DDX60, HERC5, IFI16, TRIM5, CASP4, DHX58, NLRP2, S100A12, CD14, GBP1, N4BP1, TRIM22, MX2, MX1, SIGLEC10, EIF2AK2, PARP9, PARP14, TICAM1, OAS1, OAS2, OAS3, IRF7, TLR8, TLR7, S100A9, TLR2	187	635	19462	5.40862	1.82787e-11	6.08343e-12	5.98056e-12
GO:0009615	response to virus	13	6.46766	6.32927e-10	BATF3, MX2, MX1, IFI44, EIF2AK2, DDX60, OAS1, OAS2, OAS3, DHX58, IRF7, TLR8, TRIM22	187	110	19462	12.2998	1.08547e-06	2.68464e-07	2.63924e-07
GO:0071222	cellular response to lipopolysaccharide	16	7.9602	7.82694e-10	IL10, CXCL6, CD274, WNT5A, ACOD1, LILRB2, PDCD1LG2, TICAM1, ZFP36, SBNO2, TNIP1, TNIP3, ZC3H12A, PDE4B, CD14, CCR5	187	198	19462	8.41009	1.34232e-06	2.68464e-07	2.63924e-07
GO:0032728	positive regulation of interferon-beta production	9	4.47761	6.52137e-09	OAS1, OAS2, OAS3, DHX58, IRF7, TLR8, TLR7, TICAM1, TLR2	187	43	19462	21.7831	1.11841e-05	1.86403e-06	1.83251e-06
GO:0045071	negative regulation of viral genome replication	9	4.47761	9.53721e-09	PLSCR1, IFI16, OAS1, TNIP1, OAS2, OAS3, MX1, EIF2AK2, N4BP1	187	45	19462	20.815	1.63562e-05	2.33662e-06	2.29711e-06
GO:0006955	immune response	20	9.95025	4.96392e-07	IL10, CXCL6, CD274, IFI6, IFI44, SECTM1, SERPINB9, IL1RAP, LILRB2, PDCD1LG2, HLA-F, ETS1, BMP6, IL7, ENPP2, CCR7, CCR5, IL7R, TRIM22, TLR2	187	512	19462	4.06542	0.000850951	0.000106414	0.000104615
GO:0032722	positive regulation of chemokine production	7	3.48259	4.2003e-06	IL7, WNT5A, EIF2AK2, TLR7, TICAM1, HIF1A, TLR2	187	45	19462	16.1894	0.00717765	0.000800391	0.000786856
GO:0032496	response to lipopolysaccharide	10	4.97512	1.35506e-05	PTGIR, IL10RA, NOCT, PELI1, CCR7, ADM, PTGS2, S100A9, TLR2, FOXP1	187	149	19462	6.98489	0.0229716	0.00216641	0.00212978
GO:0050729	positive regulation of inflammatory response	9	4.47761	1.38953e-05	TNIP1, WNT5A, CASP4, S100A12, TLR7, IFI35, ETS1, S100A9, TLR2	187	114	19462	8.21644	0.023549	0.00216641	0.00212978
GO:0071219	cellular response to molecule of bacterial origin	4	1.99005	4.64342e-05	FZD5, WNT5A, ACOD1, CD14	187	8	19462	52.0374	0.0765481	0.00663622	0.00652401
GO:0032760	positive regulation of tumor necrosis factor production	8	3.9801	8.04494e-05	OAS1, FZD5, OAS2, OAS3, WNT5A, CD14, TICAM1, TLR2	187	108	19462	7.70925	0.128881	0.0106131	0.0104337
GO:0050728	negative regulation of inflammatory response	9	4.47761	9.46731e-05	IL10, SOCS3, ZFP36, TNFAIP6, IL10RA, ACOD1, FPR2, ADA, PTPN2	187	149	19462	6.2864	0.149875	0.0109815	0.0107958
GO:0060670	branching involved in labyrinthine layer morphogenesis	4	1.99005	9.81065e-05	IL10, SOCS3, FZD5, ADM	187	10	19462	41.6299	0.154867	0.0109815	0.0107958
GO:0042130	negative regulation of T cell proliferation	6	2.98507	0.000102451	IL10, CD274, CR1, PELI1, LILRB2, PDCD1LG2	187	49	19462	12.7439	0.161141	0.0109815	0.0107958
GO:0032729	positive regulation of interferon-gamma production	7	3.48259	0.000109562	FZD5, WNT5A, EBI3, PDE4B, TLR8, TLR7, CD14	187	79	19462	9.22182	0.171311	0.0110529	0.010866
GO:0051092	positive regulation of NF-kappaB transcription factor activity	9	4.47761	0.000183862	TRIM5, WNT5A, EIF2AK2, S100A12, IL1RAP, TICAM1, S100A9, TRIM22, TLR2	187	164	19462	5.71143	0.270468	0.017518	0.0172217
GO:0042742	defense response to bacterium	11	5.47264	0.000214477	IL10, CXCL6, RNF213, OAS1, OAS2, OAS3, CASP4, S100A12, FPR2, S100A9, GBP1	187	261	19462	4.3863	0.307791	0.0193594	0.019032
GO:0032481	positive regulation of type I interferon production	5	2.48756	0.000299341	DHX58, IRF7, CGAS, CD14, TICAM1	187	34	19462	15.3051	0.401571	0.0256685	0.0252345
GO:0002230	positive regulation of defense response to virus by host	5	2.48756	0.000335458	TRAF3IP2, ZC3H12A, CGAS, PARP9, TRIM22	187	35	19462	14.8678	0.437524	0.0273958	0.0269325
GO:0050727	regulation of inflammatory response	7	3.48259	0.000466576	SBNO2, TNIP1, WNT5A, CASP4, NLRP2, PTGS2, FOXP1	187	103	19462	7.07305	0.550835	0.0363717	0.0357567
GO:0032755	positive regulation of interleukin-6 production	7	3.48259	0.000516964	WNT5A, TLR8, TLR7, LILRB2, IL1RAP, TICAM1, TLR2	187	105	19462	6.93832	0.588037	0.0385475	0.0378957
GO:0001819	positive regulation of cytokine production	6	2.98507	0.000553147	IL10, IFI16, PELI1, EIF2AK2, CD14, BATF	187	70	19462	8.9207	0.612837	0.039527	0.0388586
GO:0001525	angiogenesis	10	4.97512	0.000798225	RNF213, HEY1, FZD5, CEMIP2, ZC3H12A, PTGS2, HIF1A, SAT1, ARHGAP24, TYMP	187	255	19462	4.08137	0.745767	0.0547582	0.0538323
GO:0060700	regulation of ribonuclease activity	3	1.49254	0.000891455	OAS1, OAS2, OAS3	187	5	19462	62.4449	0.783362	0.0588018	0.0578074
GO:0006915	apoptotic process	16	7.9602	0.000934896	SRGN, STEAP3, GADD45B, MX1, IFI6, PLSCR1, EPB41L3, CASP4, DDIT4, ZC3H12A, NLRP2, CD14, S100A9, TP53, NKX3-1, TLR2	187	620	19462	2.6858	0.798929	0.0590077	0.0580099
GO:0042100	B cell proliferation	5	2.48756	0.000963391	IL10, IL7, TICAM1, IL7R, ADA	187	46	19462	11.3125	0.808528	0.0590077	0.0580099
GO:0032689	negative regulation of interferon-gamma production	5	2.48756	0.00113182	IL10, CD274, CR1, ZC3H12A, PDCD1LG2	187	48	19462	10.8411	0.856607	0.0669332	0.0658014
GO:0006935	chemotaxis	7	3.48259	0.00128803	CXCL6, ENPP2, FPR1, CCR7, FPR2, CCR5, TYMP	187	125	19462	5.82819	0.890343	0.0736324	0.0723873
GO:0070106	interleukin-27-mediated signaling pathway	3	1.49254	0.00184859	OAS1, OAS2, MX1	187	7	19462	44.6035	0.958133	0.102269	0.10054
GO:0035458	cellular response to interferon-beta	4	1.99005	0.00235997	PNPT1, IFI16, OAS1, ACOD1	187	28	19462	14.8678	0.982615	0.119039	0.117027
GO:0002224	toll-like receptor signaling pathway	4	1.99005	0.00235997	TLR8, TLR7, TICAM1, TLR2	187	28	19462	14.8678	0.982615	0.119039	0.117027
GO:0060333	interferon-gamma-mediated signaling pathway	4	1.99005	0.00235997	SP100, IRF7, HLA-F, TP53	187	28	19462	14.8678	0.982615	0.119039	0.117027
GO:0008595	anterior/posterior axis specification, embryo	3	1.49254	0.00244931	FZD5, WNT5A, TBX3	187	8	19462	39.0281	0.98509	0.120016	0.117987
GO:0032757	positive regulation of interleukin-8 production	5	2.48756	0.0034727	WNT5A, TLR8, TLR7, CD14, TLR2	187	65	19462	8.00576	0.997436	0.157263	0.154604
GO:0045089	positive regulation of innate immune response	4	1.99005	0.0034745	PLSCR1, TLR8, FPR2, IFI35	187	32	19462	13.0094	0.997444	0.157263	0.154604
GO:0045944	positive regulation of transcription from RNA polymerase II promoter	23	11.4428	0.00348455	IL10, SP100, FZD5, CEBPD, WNT5A, ETS1, HIF1A, BMP6, TBX3, BATF, PLSCR1, SBNO2, IFI16, HEY1, TNIP1, ZC3H12A, NAMPT, IRF7, PLAGL2, TLR7, TP53, NKX3-1, TLR2	187	1232	19462	1.94296	0.997487	0.157263	0.154604
GO:0043123	positive regulation of I-kappaB kinase/NF-kappaB signaling	8	3.9801	0.00365661	TRAF3IP2, TRIM5, PELI1, S100A12, SECTM1, CCR7, TICAM1, TRIM22	187	205	19462	4.06146	0.998131	0.160797	0.158078
GO:0032731	positive regulation of interleukin-1 beta production	5	2.48756	0.00387388	IFI16, FZD5, WNT5A, NLRP2, TLR8	187	67	19462	7.76678	0.998715	0.166093	0.163284
GO:0010595	positive regulation of endothelial cell migration	5	2.48756	0.00408576	WNT5A, ZC3H12A, ETS1, RIN2, FOXP1	187	68	19462	7.65256	0.999107	0.168791	0.165937
GO:0045824	negative regulation of innate immune response	4	1.99005	0.00413366	IFI16, DHX58, ACOD1, CGAS	187	34	19462	12.2441	0.999178	0.168791	0.165937
GO:0010628	positive regulation of gene expression	13	6.46766	0.00431272	WNT5A, TICAM1, ETS1, HIF1A, BMP6, PLSCR1, HEY1, DNAJA4, ZC3H12A, IL7R, TP53, NKX3-1, TLR2	187	519	19462	2.60688	0.999396	0.172007	0.169099
GO:0019221	cytokine-mediated signaling pathway	7	3.48259	0.00442861	IL7, IL10RA, EBI3, IL3RA, IL21R, LILRB2, IL7R	187	160	19462	4.55328	0.999505	0.172615	0.169696
GO:0070242	thymocyte apoptotic process	3	1.49254	0.00472121	WNT5A, TP53, ADA	187	11	19462	28.3841	0.999701	0.179931	0.176888
GO:0008285	negative regulation of cell proliferation	12	5.97015	0.00499559	IL10, FZD5, EIF2AK2, RAPGEF2, ADM, IFI35, PTGS2, ETS1, TP53, PTPN2, NKX3-1, TLR2	187	462	19462	2.70324	0.999814	0.182868	0.179776
GO:1901224	positive regulation of NIK/NF-kappaB signaling	5	2.48756	0.00501154	EIF2AK2, TLR7, CD14, IFI35, TLR2	187	72	19462	7.22742	0.999819	0.182868	0.179776
GO:0045765	regulation of angiogenesis	4	1.99005	0.00525623	SP100, ENPP2, ETS1, EPHA2	187	37	19462	11.2513	0.999881	0.183968	0.180857
GO:2001244	positive regulation of intrinsic apoptotic signaling pathway	4	1.99005	0.00525623	PLAGL2, TP53, S100A9, NKX3-1	187	37	19462	11.2513	0.999881	0.183968	0.180857
GO:2001214	positive regulation of vasculogenesis	3	1.49254	0.00562999	RAPGEF2, ADM, RIN2	187	12	19462	26.0187	0.999938	0.193109	0.189843
GO:0033077	T cell differentiation in thymus	4	1.99005	0.00654535	FZD5, IL7R, TP53, ADA	187	40	19462	10.4075	0.999987	0.209992	0.206441
GO:0042532	negative regulation of tyrosine phosphorylation of STAT protein	3	1.49254	0.006612	SOCS3, PARP14, PTPN2	187	13	19462	24.0173	0.999989	0.209992	0.206441
GO:0002430	complement receptor mediated signaling pathway	3	1.49254	0.006612	CR1, FPR1, FPR2	187	13	19462	24.0173	0.999989	0.209992	0.206441
GO:0034145	positive regulation of toll-like receptor 4 signaling pathway	3	1.49254	0.006612	PELI1, CD14, IFI35	187	13	19462	24.0173	0.999989	0.209992	0.206441
GO:0007267	cell-cell signaling	8	3.9801	0.00738004	CXCL6, PTGIR, TNFAIP6, IL7, NAMPT, LILRB2, CCR5, S100A9	187	234	19462	3.55812	0.999997	0.230123	0.226232
GO:0090630	activation of GTPase activity	6	2.98507	0.00801656	CCDC125, WNT5A, TBC1D9, CCR7, ARHGAP24, EPHA2	187	129	19462	4.84069	0.999999	0.245507	0.241356
GO:0071347	cellular response to interleukin-1	5	2.48756	0.00825635	ZC3H12A, ACOD1, HIF1A, GBP1, NKX3-1	187	83	19462	6.26957	0.999999	0.248415	0.244214
GO:0002281	macrophage activation involved in immune response	3	1.49254	0.00878988	SBNO2, IFI35, TICAM1	187	15	19462	20.815	1	0.255503	0.251182
GO:0002753	cytoplasmic pattern recognition receptor signaling pathway	3	1.49254	0.00878988	DHX58, IRF7, CGAS	187	15	19462	20.815	1	0.255503	0.251182
GO:0006952	defense response	5	2.48756	0.00933344	CXCL6, TNIP1, MX2, MX1, ACOD1	187	86	19462	6.05086	1	0.266781	0.26227
GO:0030890	positive regulation of B cell proliferation	4	1.99005	0.00964564	IL7, PELI1, TICAM1, ADA	187	46	19462	9.04999	1	0.271185	0.266599
GO:0070534	protein K63-linked ubiquitination	4	1.99005	0.0108387	RNF213, TRAF3IP2, TRIM5, PELI1	187	48	19462	8.67291	1	0.299813	0.294743
GO:0071356	cellular response to tumor necrosis factor	6	2.98507	0.0111738	ZFP36, ZC3H12A, ACOD1, GBP1, NKX3-1, FOXP1	187	140	19462	4.46035	1	0.301287	0.296193
GO:0046426	negative regulation of JAK-STAT cascade	3	1.49254	0.0112434	SOCS2, SOCS3, PTPN2	187	17	19462	18.3662	1	0.301287	0.296193
GO:0045892	negative regulation of transcription, DNA-templated	13	6.46766	0.0116949	SP100, CEBPD, WNT5A, PARP14, TBX3, FOXP1, SBNO2, IFI16, HEY1, BASP1, TP53, TRIM22, NKX3-1	187	592	19462	2.28543	1	0.308566	0.303349
GO:0006957	complement activation, alternative pathway	3	1.49254	0.01257	CR1, CFH, CFB	187	18	19462	17.3458	1	0.326629	0.321106
GO:0098586	cellular response to virus	5	2.48756	0.0131003	OAS1, ZC3H12A, IFI6, TLR7, HIF1A	187	95	19462	5.47762	1	0.33533	0.329659
GO:0032695	negative regulation of interleukin-12 production	3	1.49254	0.0139613	IL10, TLR8, CCR7	187	19	19462	16.4329	1	0.352113	0.346159
GO:1902895	positive regulation of pri-miRNA transcription from RNA polymerase II promoter	4	1.99005	0.0141804	IL10, ETS1, HIF1A, TP53	187	53	19462	7.85471	1	0.352454	0.346494
GO:0071346	cellular response to interferon-gamma	5	2.48756	0.0155575	PDE12, WNT5A, ACOD1, GBP1, TLR2	187	100	19462	5.20374	1	0.381158	0.374712
GO:0060337	type I interferon signaling pathway	4	1.99005	0.0164352	SP100, OAS1, OAS2, IRF7	187	56	19462	7.43392	1	0.396991	0.390278
GO:0007204	positive regulation of cytosolic calcium ion concentration	6	2.98507	0.0167124	PTGIR, FPR1, CCR7, ADM, FPR2, CCR5	187	155	19462	4.0287	1	0.397807	0.39108
GO:0060218	hematopoietic stem cell differentiation	3	1.49254	0.0169329	ZFP36, TP53, BATF	187	21	19462	14.8678	1	0.397807	0.39108
GO:0060339	negative regulation of type I interferon-mediated signaling pathway	3	1.49254	0.0185105	OAS1, OAS3, PTPN2	187	22	19462	14.192	1	0.417703	0.41064
GO:0045088	regulation of innate immune response	3	1.49254	0.0185105	DHX58, CGAS, N4BP1	187	22	19462	14.192	1	0.417703	0.41064
GO:0002755	MyD88-dependent toll-like receptor signaling pathway	3	1.49254	0.0185105	TNIP1, TLR8, TLR2	187	22	19462	14.192	1	0.417703	0.41064
GO:0048250	mitochondrial iron ion transport	2	0.995025	0.0190233	SLC25A37, SLC25A28	187	2	19462	104.075	1	0.418269	0.411196
GO:0045655	regulation of monocyte differentiation	2	0.995025	0.0190233	IRF7, FOXP1	187	2	19462	104.075	1	0.418269	0.411196
GO:0051384	response to glucocorticoid	4	1.99005	0.0197366	IL10, ADM, PTGS2, BMP6	187	60	19462	6.93832	1	0.428458	0.421213
GO:0016567	protein ubiquitination	11	5.47264	0.0217412	SOCS2, HERC5, SOCS3, ZNRF2, RNF213, TRIM5, FBXO6, MARCHF9, MARCHF3, TRIM22, HERC6	187	498	19462	2.29884	1	0.466078	0.458196
GO:0060907	positive regulation of macrophage cytokine production	3	1.49254	0.023595	WNT5A, TLR7, TICAM1	187	25	19462	12.489	1	0.499574	0.491127
GO:0032727	positive regulation of interferon-alpha production	3	1.49254	0.025403	IRF7, TLR8, TLR7	187	26	19462	12.0086	1	0.524894	0.516018
GO:0034142	toll-like receptor 4 signaling pathway	3	1.49254	0.025403	OAS1, TNIP3, CD14	187	26	19462	12.0086	1	0.524894	0.516018
GO:0007165	signal transduction	21	10.4478	0.02574	IL10, CXCL6, CD274, TNFAIP6, MX1, FPR1, SECTM1, ADM, LILRB2, HIF1A, GABRG2, ARHGAP24, TYMP, RND1, NAMPT, S100A6, PDE4B, CCR5, IL7R, RIN2, TLR2	187	1310	19462	1.66838	1	0.525524	0.516638
GO:0051091	positive regulation of sequence-specific DNA binding transcription factor activity	5	2.48756	0.0267101	IL10, SP100, TRIM5, TRIM22, NKX3-1	187	118	19462	4.40995	1	0.534758	0.525716
GO:0032480	negative regulation of type I interferon production	3	1.49254	0.0272655	DHX58, ACOD1, SIGLEC1	187	27	19462	11.5639	1	0.534758	0.525716
GO:0050807	regulation of synapse organization	3	1.49254	0.0272655	IL10, IL10RA, WNT5A	187	27	19462	11.5639	1	0.534758	0.525716
GO:0009617	response to bacterium	5	2.48756	0.0274395	DHX58, IFI44, FAM20A, CFB, HERC6	187	119	19462	4.37289	1	0.534758	0.525716
GO:0071727	cellular response to triacyl bacterial lipopeptide	2	0.995025	0.0283996	CD14, TLR2	187	3	19462	69.3832	1	0.541169	0.532018
GO:0000958	mitochondrial mRNA catabolic process	2	0.995025	0.0283996	PNPT1, PDE12	187	3	19462	69.3832	1	0.541169	0.532018
GO:0032703	negative regulation of interleukin-2 production	3	1.49254	0.0291813	ZFP36, CR1, GBP1	187	28	19462	11.1509	1	0.549956	0.540656
GO:0042832	defense response to protozoan	3	1.49254	0.0311493	IL10, GBP1, BATF	187	29	19462	10.7664	1	0.580663	0.570844
GO:0019933	cAMP-mediated signaling	3	1.49254	0.0331682	CGAS, RAPGEF2, ADM	187	30	19462	10.4075	1	0.61165	0.601308
GO:0043066	negative regulation of apoptotic process	11	5.47264	0.0358683	IL10, SOCS2, SOCS3, IL7, WNT5A, AMIGO2, IFI6, EIF2AK2, SERPINB9, TP53, TBX3	187	542	19462	2.11222	1	0.646062	0.635137
GO:0046677	response to antibiotic	3	1.49254	0.0373545	SLC1A3, ETS1, TP53	187	32	19462	9.75702	1	0.646062	0.635137
GO:0039530	MDA-5 signaling pathway	2	0.995025	0.0376867	OAS3, IRF7	187	4	19462	52.0374	1	0.646062	0.635137
GO:1900245	positive regulation of MDA-5 signaling pathway	2	0.995025	0.0376867	DHX58, DDX60	187	4	19462	52.0374	1	0.646062	0.635137
GO:0090271	positive regulation of fibroblast growth factor production	2	0.995025	0.0376867	HEG1, PTGS2	187	4	19462	52.0374	1	0.646062	0.635137
GO:1903003	positive regulation of protein deubiquitination	2	0.995025	0.0376867	TNIP1, ZC3H12A	187	4	19462	52.0374	1	0.646062	0.635137
GO:0071659	negative regulation of IP-10 production	2	0.995025	0.0376867	OAS1, OAS3	187	4	19462	52.0374	1	0.646062	0.635137
GO:0001938	positive regulation of endothelial cell proliferation	4	1.99005	0.0387774	IL10, WNT5A, HIF1A, BMP6	187	78	19462	5.33717	1	0.646062	0.635137
GO:0071260	cellular response to mechanical stimulus	4	1.99005	0.0387774	TLR8, TLR7, PTGS2, BMP6	187	78	19462	5.33717	1	0.646062	0.635137
GO:0007166	cell surface receptor signaling pathway	8	3.9801	0.0388014	ADGRE1, CD274, LILRB2, CD14, FPR2, PDCD1LG2, CCR5, IL7R	187	329	19462	2.5307	1	0.646062	0.635137
GO:0042771	intrinsic apoptotic signaling pathway in response to DNA damage by p53 class mediator	3	1.49254	0.0395196	IFI16, DDIT4, TP53	187	33	19462	9.46135	1	0.651694	0.640674
GO:2000379	positive regulation of reactive oxygen species metabolic process	3	1.49254	0.0417312	ZC3H12A, ACOD1, TP53	187	34	19462	9.18308	1	0.67518	0.663763
GO:0033574	response to testosterone	3	1.49254	0.0417312	XRN1, NKX3-1, FOXP1	187	34	19462	9.18308	1	0.67518	0.663763
GO:0050830	defense response to Gram-positive bacterium	5	2.48756	0.0445381	CASP4, ADM, IL7R, EPHA2, TLR2	187	139	19462	3.7437	1	0.687253	0.675632
GO:0030593	neutrophil chemotaxis	4	1.99005	0.0452625	CXCL6, PDE4B, S100A12, S100A9	187	83	19462	5.01566	1	0.687253	0.675632
GO:0002218	activation of innate immune response	3	1.49254	0.0462897	IFI16, TRIM5, CGAS	187	36	19462	8.67291	1	0.687253	0.675632
GO:0055072	iron ion homeostasis	3	1.49254	0.0462897	SLC25A37, STEAP3, SLC25A28	187	36	19462	8.67291	1	0.687253	0.675632
GO:0071726	cellular response to diacyl bacterial lipopeptide	2	0.995025	0.0468855	CD14, TLR2	187	5	19462	41.6299	1	0.687253	0.675632
GO:0051964	negative regulation of synapse assembly	2	0.995025	0.0468855	WNT5A, TLR2	187	5	19462	41.6299	1	0.687253	0.675632
GO:0002071	glandular epithelial cell maturation	2	0.995025	0.0468855	FZD5, HIF1A	187	5	19462	41.6299	1	0.687253	0.675632
GO:0048022	negative regulation of melanin biosynthetic process	2	0.995025	0.0468855	WNT5A, RAPGEF2	187	5	19462	41.6299	1	0.687253	0.675632
GO:0002360	T cell lineage commitment	2	0.995025	0.0468855	IL7, TP53	187	5	19462	41.6299	1	0.687253	0.675632
GO:0072539	T-helper 17 cell differentiation	2	0.995025	0.0468855	ENTPD7, BATF	187	5	19462	41.6299	1	0.687253	0.675632
GO:0070245	positive regulation of thymocyte apoptotic process	2	0.995025	0.0468855	WNT5A, TP53	187	5	19462	41.6299	1	0.687253	0.675632
GO:0097193	intrinsic apoptotic signaling pathway	3	1.49254	0.0486345	CASP4, IFI6, TP53	187	37	19462	8.4385	1	0.706849	0.694896
GO:0001818	negative regulation of cytokine production	3	1.49254	0.0510216	SRGN, IL10, N4BP1	187	38	19462	8.21644	1	0.729183	0.716853
GO:0072593	reactive oxygen species metabolic process	3	1.49254	0.0510216	DDIT4, IFI6, TP53	187	38	19462	8.21644	1	0.729183	0.716853
GO:0010508	positive regulation of autophagy	4	1.99005	0.0537059	TRIM5, ZC3H12A, TICAM1, TRIM22	187	89	19462	4.67752	1	0.761203	0.748331
GO:0060574	intestinal epithelial cell maturation	2	0.995025	0.0559968	FZD5, HIF1A	187	6	19462	34.6916	1	0.768276	0.755285
GO:2000342	negative regulation of chemokine (C-X-C motif) ligand 2 production	2	0.995025	0.0559968	OAS1, OAS3	187	6	19462	34.6916	1	0.768276	0.755285
GO:0071650	negative regulation of chemokine (C-C motif) ligand 5 production	2	0.995025	0.0559968	IL10, OAS3	187	6	19462	34.6916	1	0.768276	0.755285
GO:0061419	positive regulation of transcription from RNA polymerase II promoter in response to hypoxia	2	0.995025	0.0559968	HIF1A, TP53	187	6	19462	34.6916	1	0.768276	0.755285
GO:0019722	calcium-mediated signaling	4	1.99005	0.0581911	CCR7, FPR2, CCR5, ADA	187	92	19462	4.52499	1	0.792046	0.778653
GO:0030217	T cell differentiation	3	1.49254	0.0609729	TRAF3IP2, IL7R, PTPN2	187	42	19462	7.43392	1	0.814647	0.800872
GO:0031663	lipopolysaccharide-mediated signaling pathway	3	1.49254	0.0609729	CD14, TICAM1, TLR2	187	42	19462	7.43392	1	0.814647	0.800872
GO:0032088	negative regulation of NF-kappaB transcription factor activity	4	1.99005	0.0612766	ZC3H12A, NLRP2, PELI1, ACOD1	187	94	19462	4.42872	1	0.814647	0.800872
GO:0032880	regulation of protein localization	4	1.99005	0.0628476	TRIM5, WNT5A, TRIM22, NKX3-1	187	95	19462	4.3821	1	0.829105	0.815085
GO:0001756	somitogenesis	3	1.49254	0.0635566	WNT5A, TP53, NKX3-1	187	43	19462	7.26104	1	0.832058	0.817988
GO:2000110	negative regulation of macrophage apoptotic process	2	0.995025	0.0650215	IRF7, CCR5	187	7	19462	29.7357	1	0.84069	0.826474
GO:0006914	autophagy	5	2.48756	0.0652909	GRAMD1A, IFI16, TRIM5, TP53, S100A9	187	158	19462	3.29351	1	0.84069	0.826474
GO:0007259	JAK-STAT cascade	3	1.49254	0.0661768	SOCS2, IL15RA, SOCS3	187	44	19462	7.09601	1	0.84069	0.826474
GO:1901223	negative regulation of NIK/NF-kappaB signaling	3	1.49254	0.0661768	ZC3H12A, NLRP2, IFI35	187	44	19462	7.09601	1	0.84069	0.826474
GO:0006974	cellular response to DNA damage stimulus	7	3.48259	0.0673662	ZC3H12A, IRF7, CGAS, TP53, NKX3-1, BATF, FOXP1	187	298	19462	2.44471	1	0.849508	0.835143
GO:0030316	osteoclast differentiation	3	1.49254	0.0688325	SBNO2, EPHA2, FOXP1	187	45	19462	6.93832	1	0.861662	0.847091
GO:0042092	type 2 immune response	2	0.995025	0.0739604	IL10, TRAF3IP2	187	8	19462	26.0187	1	0.890442	0.875385
GO:0090503	RNA phosphodiester bond hydrolysis, exonucleolytic	2	0.995025	0.0739604	XRN1, PDE12	187	8	19462	26.0187	1	0.890442	0.875385
GO:0060336	negative regulation of interferon-gamma-mediated signaling pathway	2	0.995025	0.0739604	PARP14, PTPN2	187	8	19462	26.0187	1	0.890442	0.875385
GO:0042135	neurotransmitter catabolic process	2	0.995025	0.0739604	MAOA, COMT	187	8	19462	26.0187	1	0.890442	0.875385
GO:0048870	cell motility	3	1.49254	0.0742468	ENPP2, ETS1, EPHA2	187	47	19462	6.64308	1	0.890442	0.875385
GO:0046427	positive regulation of JAK-STAT cascade	3	1.49254	0.0742468	IL10, IL10RA, IL7R	187	47	19462	6.64308	1	0.890442	0.875385
GO:0045766	positive regulation of angiogenesis	5	2.48756	0.0752185	WNT5A, ZC3H12A, ADM, ETS1, HIF1A	187	166	19462	3.13479	1	0.895831	0.880683
GO:0046718	viral entry into host cell	4	1.99005	0.0760736	PLSCR1, CR1, CCR5, EPHA2	187	103	19462	4.04174	1	0.899767	0.884553
GO:0072540	T-helper 17 cell lineage commitment	2	0.995025	0.0828143	SOCS3, BATF	187	9	19462	23.1277	1	0.940573	0.924668
GO:0001768	establishment of T cell polarity	2	0.995025	0.0828143	TRAF3IP2, CCR7	187	9	19462	23.1277	1	0.940573	0.924668
GO:0003208	cardiac ventricle morphogenesis	2	0.995025	0.0828143	HEY1, HIF1A	187	9	19462	23.1277	1	0.940573	0.924668
GO:0030728	ovulation	2	0.995025	0.0828143	TNFAIP6, PTGS2	187	9	19462	23.1277	1	0.940573	0.924668
GO:0032651	regulation of interleukin-1 beta production	2	0.995025	0.0828143	CCR7, FOXP1	187	9	19462	23.1277	1	0.940573	0.924668
GO:1900119	positive regulation of execution phase of apoptosis	2	0.995025	0.0828143	ZC3H12A, TP53	187	9	19462	23.1277	1	0.940573	0.924668
GO:0010629	negative regulation of gene expression	7	3.48259	0.0862293	NOCT, ZC3H12A, PARP14, PARP9, HIF1A, NKX3-1, FOXP1	187	319	19462	2.28377	1	0.972916	0.956465
GO:0030182	neuron differentiation	5	2.48756	0.0873127	FZD5, WNT5A, DDIT4, BMP6, EPHA2	187	175	19462	2.97357	1	0.97776	0.961226
GO:0001666	response to hypoxia	5	2.48756	0.0901041	DDIT4, ADM, HIF1A, ADA, TLR2	187	177	19462	2.93997	1	0.97776	0.961226
GO:0007252	I-kappaB phosphorylation	2	0.995025	0.0915839	TLR7, TLR2	187	10	19462	20.815	1	0.97776	0.961226
GO:0000288	nuclear-transcribed mRNA catabolic process, deadenylation-dependent decay	2	0.995025	0.0915839	ZFP36, PDE12	187	10	19462	20.815	1	0.97776	0.961226
GO:0034356	NAD biosynthesis via nicotinamide riboside salvage pathway	2	0.995025	0.0915839	NAMPT, PARP9	187	10	19462	20.815	1	0.97776	0.961226
GO:2000627	positive regulation of miRNA catabolic process	2	0.995025	0.0915839	PNPT1, ZC3H12A	187	10	19462	20.815	1	0.97776	0.961226
GO:0034340	response to type I interferon	2	0.995025	0.0915839	SP100, MX1	187	10	19462	20.815	1	0.97776	0.961226
GO:0031666	positive regulation of lipopolysaccharide-mediated signaling pathway	2	0.995025	0.0915839	CD14, BMP6	187	10	19462	20.815	1	0.97776	0.961226
GO:0045893	positive regulation of transcription, DNA-templated	12	5.97015	0.0917897	IL10, SP100, TRIM5, WNT5A, IRF7, PARP9, ETS1, HIF1A, TP53, TRIM22, TBX3, NKX3-1	187	730	19462	1.71082	1	0.97776	0.961226
GO:0007155	cell adhesion	10	4.97512	0.094746	PCDHGA10, ADGRE1, TNFAIP6, PCDHGA3, AMIGO2, SIGLEC10, SLAMF7, FPR2, ADA, EPHA2	187	567	19462	1.83554	1	0.994008	0.9772
GO:0030282	bone mineralization	3	1.49254	0.09715	SBNO2, PTGS2, HIF1A	187	55	19462	5.67681	1	0.994008	0.9772
