# Supplementary material for: PARK7/DJ-1 deficiency impairs microglial activation in response to LPS-induced inflammation
Source: J Neuroinflammation. 2024 Jul 16;21:174. doi: 10.1186/s12974-024-03164-x (PMC11253405; doi:10.1186/s12974-024-03164-x)
Supplement: Supplementary file 10 — Supplementary Material 10. [file 12974_2024_3164_MOESM10_ESM.xlsx]

## Sheet: DEGs
Table S4
Up-regulated genes (adjusted p-value < 0.05, log2FC ≥ 0.5)
Cluster 1	Cluster 2	Cluster 3	Cluster 4	Cluster 5
Cst3	Malat1	AW112010	Dtl	Ifit2
Ctss	Gm26924	Sdc4	Chaf1a	I830012O16Rik
Tmsb4x	mt-Rnr2	Msr1	Uhrf1	Ifit3
Hexb	Dst	Lrrc58	Ncapg2	Rsad2
C1qa	mt-Rnr1	Ms4a6d	Lig1	Cxcl10
C1qc	Zeb2	Gpr84	Top2a	Iigp1
C1qb	Rbm25	B2m	Ezh2	Ifit1
Calr	Atrx	Srgn	Mcm6	Isg15
Itm2b	Macf1	Lcn2	Itm2b	Cmpk2
B2m	Ash1l	Sod2	Gmnn	Mx1
Actb	Diap2	Ms4a6c	Hexb	Tnfsf10
Lgmn	Nktr	Fth1	Cdca7	Oasl1
Tyrobp	Fyb	Ccl3	Snrpa1	Pyhin1
Cd81	Ssh2	Ptplb	Mcm3	Gm4951
Selplg	Ranbp2	Slc25a5	Hells	Phf11a
Olfml3	Luc7l3	Cyba	Ranbp1	Mnda
Pdia3	CT030684.1	Igsf6	Smc2	Phf11b
Ctsd	Stab1	C5ar1	Fth1	Trim30c
Lrrc58	Son	Nfkbia	Golm1	Oasl2
Fcgr3	Ubn2	Lilrb4	Atad5	Slfn9
Cx3cr1	RP24-312B12.1	Ctsl	Pdia3	Mx2
Sparc	Jmjd1c	Gas5	Psma6	Isg20
Ifngr1	Wnk1	Cebpb	Rrm1	Gbp5
Sepp1	Mycbp2	Fcer1g	Actb	Slfn5
Ctsl	Arhgap5	Rps19	G3bp2	Phf11d
Ly6e	Zc3h7a	Cd14	Psmb8	Pydc4
Trf	Tanc2	Vimp	Pkm	Ccl7
Rplp1	Rbm26	Filip1l	Tmpo	Fgl2
Ctsh	Dleu2	Cdkn1a	Eri1	Zbp1
Calm2	4632427E13Rik	Cfl1	Cbx5	Ifi204
Tmem119	Fus	Rps9	Sdhd	Samd9l
	Prrc2c	C3ar1	Cct3	Usp18
	Chd7	Pilra	C1qb	Gm4955
	Bptf	Fcgr4	Rap1b	Gm6904
	Gm17066	Samsn1	Emr1	Gbp2
	Zfc3h1	Ddit4	Etaa1	Trp53i11
	Sfrs18	Ms4a6b	Ly86	Ifi205
	Prpf38b	H2-D1	Hsf2	Gbp3
	9930111J21Rik2	H3f3b	Pdia6	Stat1
	Trpm2	Rps2	Cd81	Parp14
	Rb1cc1	Hspa8	Prim1	Irf7
	Phf14	Eif5a	Ifi30	Ccl12
	Ttc14	Slc15a3	Fen1	Herc6
	Cacna1d	Dab2	Oxct1	Ddx60
	Prpf4b	Eif1	Atp5a1	Xaf1
	Golga4	Tnfaip2	Memo1	Cd69
	Snord49b	Clic1	Kdelc1	Slfn8
	Nlrp1b	Id2	Pop5	Tor3a
	D14Abb1e	Gm17087	Slc35b1	Ccl2
	Ascc3	Gpr65	Pros1	Bst2
	Golgb1	Milr1	Brca2	AI607873
	Birc6	Plek	Dnajc9	Irgm1
	Vps13c	Glrx	Rbl1	Il18
	Cep110	Cd63	Psmd8	Rtp4
	Srrm2	Slc31a2	Pcna	Ifih1
	Rnf169	Ier3	Topbp1	Eif2ak2
	Ank2	Hsd17b12	Bag1	Ifitm3
	Akap9	Nlrp3	Fcrls	Enpp4
	Arhgef1	Ifitm3	Erp29	Tgtp2
	Huwe1	Bcl2a1b	Rac2	March5
	Tbc1d5	Clec4a3	Cdk4	Ddx58
	Rbm6	Xbp1	Atad2	Stat2
	Rif1	Slc3a2	Nasp	Timeless
	Bod1l	Emc7	Rps5	Parp9
	Gcc2	Tmem154	Haus8	Nampt
	Zcchc7	Saa3	Cd14	Etnk1
	Rock2	Ccl2	Gspt1	Oas1a
	BC005561	Bcl2a1a	Rpn1	Gbp7
	Zfml	Clec4a2	Prdx3	Asb13
	Itsn2	Ier2	Dnmt1	Tor1aip1
	Ylpm1	D17H6S56E-5	Cpd	Sap30
	Rbm39	Ell2	Mdh1	Sp110
	Ncor1	Clec4a1	Tram1	Igtp
	Pnn	Prdx5	Gusb	mt-Nd6
	Setd5	Serp1	Gpx1	Sp100
	Dock2	Fkbp5	Rplp0	Pigv
	Zfp292	Herpud1	Parp1	Cd274
	Chd9	Tlr2	Ntpcr	AI837181
	Thoc2	Cp	Xist	Gbp9
	Ccdc41	Lrrc25	4632419I22Rik	Coro2a
	Srgap2	Il1r2	Glud1	Cd52
	Ktn1	Pilrb1	Rpl8	Pml
	Adap2	Gm10269	Tm2d2	Daxx
	Sltm	Marcksl1	Sf3a3	Rilpl1
	Ophn1	Ccl4	Whsc1	Sf3b5
	Tcirg1	Tsc22d3	Pycard	Usp25
	Tnrc6a	Ran	Ubap2	Epsti1
	Srek1	Gm26917	Psmc6	Csf1
	Phf20l1	Aoah	Cct6a	Gm4070
	Bdp1	Rrs1	Slfn9	Zufsp
	Atad2b	Cd72	Fcgr1	Usp21
	Ddx17	Slc11a1	Tmem50a	Parp10
	Herc1	Lyz2	Gatm	Trim30a
	Apc	Tmem258	Actr6	C4b
	Pkn1	Pirb	Fam114a2	BC016423
	Map4	Cited2	Rps3	Lima1
	Dennd4a	Clec2d	Fam96a	Dtx3l
	Fgd4	Tuba1b	Rrp1	Samhd1
	Frmd4b	Cd47	Cnbp	Ppm1k
	Trip11	Cybb	Zmpste24	Pnpt1
	Baz2b	Pilrb2	Pola1	Trafd1
	RP24-113D21.1	Psmd14	Ptplad1	9930111J21Rik2
	Safb2	Rnf149	Ctcf	Trim34a
	Pid1	Mt1	Cct7	Casp4
	Setd2	Spp1	Lpl	Ncoa7
	Ankhd1	Dusp1	Psmb2	Trim30d
	Scaper	Cxcl16	Stip1	P4ha1
	Rps6kb1	Il1b	Acot13	Lgals9
	Hnrnpu	Niacr1	Marco	Piga
	Nipbl	Polr3d	Hps4	Ccl4
	Slk	Postn	Gdi2	Anapc16
	Eea1	Zfp330	Mgat2	Fcgr1
	Chd2	Ccl5	Zfp426	Prdx5
	Dclre1c	Ccl12	Klhl6	H2-T22
	Chd6		Sf3b5	Rap2c
	Clip1		Gpr34	Treml2
	Specc1		Trem2	Rnaseh1
	Ankrd11		Arl6ip1	Rhog
	Smg1		Lpcat2	Lap3
	Kmt2c		Ndufa8	Slfn2
	Xist		Ctsz	Ppia
	Rptor		Ash2l	Rcn1
	Tpr		Rufy1	Psmd1
	Nsd1		Lin7c	Sp140
	Brwd1		Eif3f	Tlr3
	Cep350		Tspan14	B3gnt2
	Smg6		Cd9	Dek
	Luc7l2		Hspe1	Rptor
	Ago3		Capzb	Ubxn6
	Tcerg1		Mbtps2	H2-T23
	Paxbp1		Atp6v1c1	Sppl2a
	Elmo1		Nr3c1	Cd180
	Fam65b		Lhfpl2	Psmb8
	Cd84		Ints10	Ankle2
	Tcf12		Clta	Sepw1
	Ppm1h		Dctpp1	Itm2b
	Inpp5d		Poglut1	B2m
	Upf2		Cep57	F830016B08Rik
	Usp34		Gatad2a	Mthfr
	Rock1		Lcor	Themis2
	Pik3r6		Ly6e	Atp5g1
	Ewsr1		Bub3	Tmem50a
	Phip		Psmb6	Adar
	Mga		Nsmce2	Ldlrap1
	Phc3		Ift20	Map3k8
	Wapal		Txndc15	Slc25a45
	Rnpc3		Gmfb	Pycard
	Stard9		Ssr2	Rel
	Baz1b		Marc2	Tmcc3
			Dek	Taf15
			Ebna1bp2	Psmg3
			Tpm4	Fam53b
			Ube2b	Nmi
			Rab1	Cox6a2
			Wdhd1	Banf1
			Manf	Cep152
			Cct8	Atp5b
			Sirpa	Rufy3
			2610001J05Rik	Trim12a
			Ccl5	Fnbp1l
			Itga9	Ikzf1
			Paics	Actr2
			Tcp1	Tspo
			Tomm22	Gm6625
			Ube2q1	Vcam1
			Atp1b3	Ighm
			Sec11c	Slc3a2
			Cnpy2	Dcp2
			Snap23	Vwa1
			Eif3l	Rnf213
			Sdf4	Ctbp1
			Polb	Taok3
			Hsbp1	Aim2
			2810025M15Rik	Morc3
			Alox5ap	Hltf
			Lyz2	Il15ra
			Stag2	Ppp6r3
			Cct2	Atp6v1c1
			Snx3	Bcl2a1b
			Tbl1x	Canx
			Tmem176b	Dnajc13
			Nudcd2	1500012F01Rik
			Mrpl18	Ndufb8
			Pgap2	Soat1
			Saa3	Mcee
			Asf1a	Elf1
			Ndufc2	Apoa1bp
			0610009D07Rik
			Sepp1
			Ndufb11
			Actl6a
			Atp6ap2
			Dennd4a
			Fos
			Tbc1d20
			Sgk3
			Snx17

## Sheet: Cluster 1 Up BP
Term		Count	%	PValue	Genes	List Total	Pop Hits	Pop Total	Fold Enrichment	Bonferroni	Benjamini	FDR
GO:0098883	synapse disassembly	3	13.0435	2.36065e-05	C1QB, C1QA, C1QC	23	7	20240	377.143	0.00747883	0.00750685	0.00748325
GO:0002376	immune system process	5	21.7391	0.00272574	C1QB, C1QA, TYROBP, CD81, C1QC	23	553	20240	7.9566	0.580196	0.297558	0.296622
GO:0051603	proteolysis involved in cellular protein catabolic process	3	13.0435	0.00282865	CTSH, CTSS, LGMN	23	73	20240	36.1644	0.593749	0.297558	0.296622
GO:0010628	positive regulation of gene expression	5	21.7391	0.00392381	TYROBP, IFNGR1, TMEM119, CTSH, CALR	23	612	20240	7.18954	0.71356	0.297558	0.296622
GO:0008284	positive regulation of cell proliferation	5	21.7391	0.00467858	CST3, CD81, CTSH, CALR, LGMN	23	643	20240	6.84292	0.774916	0.297558	0.296622
GO:0032760	positive regulation of tumor necrosis factor production	3	13.0435	0.0104379	FCGR3, TYROBP, IFNGR1	23	143	20240	18.4615	0.964445	0.553206	0.551466
GO:0010447	response to acidic pH	2	8.69565	0.0151152	CTSS, LGMN	23	14	20240	125.714	0.992119	0.582755	0.580923
GO:0097067	cellular response to thyroid hormone stimulus	2	8.69565	0.0183256	CTSH, CTSS	23	17	20240	103.529	0.99721	0.582755	0.580923
GO:0048143	astrocyte activation	2	8.69565	0.0183256	C1QA, IFNGR1	23	17	20240	103.529	0.99721	0.582755	0.580923
GO:0010952	positive regulation of peptidase activity	2	8.69565	0.0183256	CTSH, CTSS	23	17	20240	103.529	0.99721	0.582755	0.580923
GO:0006958	complement activation, classical pathway	3	13.0435	0.0239505	C1QB, C1QA, C1QC	23	222	20240	11.8919	0.999551	0.692386	0.690208
GO:0006508	proteolysis	4	17.3913	0.0276283	CTSH, CTSD, CTSS, LGMN	23	612	20240	5.75163	0.999865	0.73215	0.729847
GO:0001774	microglial cell activation	2	8.69565	0.0342287	C1QA, IFNGR1	23	32	20240	55	0.999985	0.837287	0.834654
GO:0030316	osteoclast differentiation	2	8.69565	0.0540198	TYROBP, TRF	23	51	20240	34.5098	1	1	1
GO:2001235	positive regulation of apoptotic signaling pathway	2	8.69565	0.0550506	CTSH, CTSS	23	52	20240	33.8462	1	1	1
GO:1901216	positive regulation of neuron death	2	8.69565	0.0581367	C1QA, TYROBP	23	55	20240	32	1	1	1
GO:0070371	ERK1 and ERK2 cascade	2	8.69565	0.0612131	TRF, CTSH	23	58	20240	30.3448	1	1	1
GO:0050766	positive regulation of phagocytosis	2	8.69565	0.0774596	FCGR3, CALR	23	74	20240	23.7838	1	1	1

## Sheet: Cluster 2 Up BP
Term		Count	%	PValue	Genes	List Total	Pop Hits	Pop Total	Fold Enrichment	Bonferroni	Benjamini	FDR
GO:0008380	RNA splicing	14	10.3704	3.79577e-08	DDX17, SRRM2, RBM39, TCERG1, PRPF38B, RBM25, FUS, HNRNPU, PRPF4B, THOC2, PNN, SON, LUC7L3, SREK1	132	282	20240	7.61229	4.03102e-05	4.03111e-05	4.02351e-05
GO:0006325	chromatin organization	15	11.1111	1.16737e-07	SETD5, SETD2, CHD9, KMT2C, CHD7, ATRX, CHD6, HNRNPU, JMJD1C, ASH1L, BAZ1B, CHD2, NCOR1, NSD1, PKN1	132	367	20240	6.26703	0.000123967	6.19872e-05	6.18704e-05
GO:0006397	mRNA processing	14	10.3704	8.07446e-07	DDX17, SRRM2, RBM39, TCERG1, PRPF38B, RBM25, RBM26, HNRNPU, PRPF4B, THOC2, PNN, SON, LUC7L3, SREK1	132	368	20240	5.83333	0.00085714	0.000285836	0.000285297
GO:0006974	cellular response to DNA damage stimulus	14	10.3704	3.9285e-05	SETD2, SMG1, DCLRE1C, RIF1, ATRX, HUWE1, BAZ1B, CHD2, RPTOR, NIPBL, RNF169, BOD1L, APC, ASCC3	132	528	20240	4.06566	0.0408632	0.0104302	0.0104105
GO:0045944	positive regulation of transcription from RNA polymerase II promoter	19	14.0741	0.00124085	DDX17, TCERG1, PID1, KMT2C, MGA, CHD7, ATRX, TCF12, CHD6, HNRNPU, ASH1L, BAZ1B, ATAD2B, NIPBL, ZEB2, ZFP292, PHIP, PAXBP1, BPTF	132	1257	20240	2.31769	0.732491	0.223653	0.223232
GO:0018105	peptidyl-serine phosphorylation	7	5.18519	0.00127172	SMG1, ROCK1, RPS6KB1, WNK1, ROCK2, PHIP, PKN1	132	184	20240	5.83333	0.741128	0.223653	0.223232
GO:0007010	cytoskeleton organization	6	4.44444	0.00147418	FGD4, ROCK1, DST, PHIP, DOCK2, BRWD1	132	128	20240	7.1875	0.791273	0.223653	0.223232
GO:0030036	actin cytoskeleton organization	7	5.18519	0.00265981	SPECC1, ROCK1, OPHN1, ROCK2, ELMO1, DOCK2, SSH2	132	213	20240	5.03912	0.940897	0.337454	0.336819
GO:0032204	regulation of telomere maintenance	3	2.22222	0.00309469	SMG1, YLPM1, SMG6	132	13	20240	35.3846	0.962808	0.337454	0.336819
GO:2001237	negative regulation of extrinsic apoptotic signaling pathway	4	2.96296	0.00328277	RPS6KB1, RB1CC1, BIRC6, PHIP	132	46	20240	13.3333	0.969561	0.337454	0.336819
GO:0031122	cytoplasmic microtubule organization	4	2.96296	0.0037054	CLIP1, SLK, APC, DST	132	48	20240	12.7778	0.980599	0.337454	0.336819
GO:0006281	DNA repair	9	6.66667	0.00397673	SETD2, SMG1, DCLRE1C, RNF169, BOD1L, RIF1, ATRX, HUWE1, ASCC3	132	391	20240	3.52941	0.985473	0.337454	0.336819
GO:0038202	TORC1 signaling	3	2.22222	0.0041308	RPTOR, SMG1, RPS6KB1	132	15	20240	30.6667	0.987673	0.337454	0.336819
GO:0000281	mitotic cytokinesis	4	2.96296	0.00758805	SON, ROCK1, APC, ROCK2	132	62	20240	9.89247	0.999693	0.575608	0.574524
GO:0072520	seminiferous tubule development	3	2.22222	0.00882296	ATRX, JMJD1C, SCAPER	132	22	20240	20.9091	0.999918	0.586669	0.585564
GO:0000381	regulation of alternative mRNA splicing, via spliceosome	4	2.96296	0.0093896	DDX17, RBM25, HNRNPU, MALAT1	132	67	20240	9.15423	0.999955	0.586669	0.585564
GO:0030334	regulation of cell migration	5	3.7037	0.00939112	MACF1, SLK, ROCK1, APC, SRGAP2	132	127	20240	6.03675	0.999956	0.586669	0.585564
GO:0006915	apoptotic process	11	8.14815	0.0113927	RBM25, SLK, SLTM, ROCK1, APC, RPS6KB1, RB1CC1, INPP5D, ELMO1, BIRC6, TCIRG1	132	666	20240	2.53253	0.999995	0.67217	0.670905
GO:0032922	circadian regulation of gene expression	4	2.96296	0.0122979	NCOR1, MYCBP2, HUWE1, HNRNPU	132	74	20240	8.28829	0.999998	0.685328	0.684037
GO:0048598	embryonic morphogenesis	3	2.22222	0.013127	ZEB2, ROCK1, ROCK2	132	27	20240	17.037	0.999999	0.685328	0.684037
GO:0010468	regulation of gene expression	9	6.66667	0.0135517	NIPBL, SETD2, NSD1, KMT2C, CHD7, CHD6, ASH1L, TCIRG1, THOC2	132	484	20240	2.85124	0.999999	0.685328	0.684037
GO:0031116	positive regulation of microtubule polymerization	3	2.22222	0.0150568	CLIP1, APC, AKAP9	132	29	20240	15.8621	1	0.726832	0.725463
GO:0048511	rhythmic process	5	3.7037	0.0175548	NCOR1, ROCK2, MYCBP2, HUWE1, HNRNPU	132	153	20240	5.01089	1	0.810574	0.809047
GO:0097198	histone H3-K36 trimethylation	2	1.48148	0.0192925	SETD5, SETD2	132	3	20240	102.222	1	0.853695	0.852087
GO:0016310	phosphorylation	10	7.40741	0.0206541	RPTOR, SMG1, SLK, ROCK1, RPS6KB1, WNK1, ROCK2, PRPF4B, PKN1, BAZ1B	132	626	20240	2.44941	1	0.877386	0.875734
GO:0060041	retina development in camera-type eye	4	2.96296	0.023175	APC, CHD7, TCIRG1, SCAPER	132	94	20240	6.52482	1	0.946609	0.944826
GO:1905205	positive regulation of connective tissue replacement	2	1.48148	0.0256409	ROCK1, ROCK2	132	4	20240	76.6667	1	0.999519	0.997637
GO:0086091	regulation of heart rate by cardiac conduction	3	2.22222	0.0263527	AKAP9, CACNA1D, ANK2	132	39	20240	11.7949	1	0.999519	0.997637
GO:0000398	mRNA splicing, via spliceosome	5	3.7037	0.0301802	SRRM2, PRPF38B, PAXBP1, RNPC3, RBM6	132	181	20240	4.23573	1	1	0.999057
GO:0031175	neuron projection development	5	3.7037	0.0301802	ROCK1, HERC1, APC, OPHN1, MAP4	132	181	20240	4.23573	1	1	0.999057
GO:0032259	methylation	5	3.7037	0.0301802	SETD5, SETD2, NSD1, KMT2C, ASH1L	132	181	20240	4.23573	1	1	0.999057
GO:0000184	nuclear-transcribed mRNA catabolic process, nonsense-mediated decay	3	2.22222	0.0302391	UPF2, SMG1, SMG6	132	42	20240	10.9524	1	1	0.999057
GO:0097676	histone H3-K36 dimethylation	2	1.48148	0.0319486	SETD2, ASH1L	132	5	20240	61.3333	1	1	0.999057
GO:0010467	gene expression	6	4.44444	0.0334019	DDX17, NCOR1, FUS, TCF12, TCIRG1, CHD2	132	275	20240	3.34545	1	1	0.999057
GO:0006357	regulation of transcription from RNA polymerase II promoter	18	13.3333	0.0335465	DDX17, FUS, MGA, TCF12, JMJD1C, CHD2, PHF20L1, NIPBL, ZEB2, NCOR1, SLTM, ZFP292, SAFB2, PHF14, PHIP, PKN1, BRWD1, BPTF	132	1627	20240	1.69637	1	1	0.999057
GO:0001837	epithelial to mesenchymal transition	3	2.22222	0.0371827	DDX17, ROCK1, ROCK2	132	47	20240	9.78723	1	1	0.999057
GO:0035509	negative regulation of myosin-light-chain-phosphatase activity	2	1.48148	0.0382157	ROCK1, ROCK2	132	6	20240	51.1111	1	1	0.999057
GO:0042471	ear morphogenesis	2	1.48148	0.0382157	NIPBL, CHD7	132	6	20240	51.1111	1	1	0.999057
GO:1903347	negative regulation of bicellular tight junction assembly	2	1.48148	0.0382157	ROCK1, ROCK2	132	6	20240	51.1111	1	1	0.999057
GO:0061038	uterus morphogenesis	2	1.48148	0.0382157	NIPBL, ASH1L	132	6	20240	51.1111	1	1	0.999057
GO:0050890	cognition	3	2.22222	0.0431324	SETD5, NIPBL, CHD7	132	51	20240	9.01961	1	1	0.999057
GO:0006914	autophagy	5	3.7037	0.0443818	CD84, HERC1, TBC1D5, RB1CC1, TCIRG1	132	205	20240	3.73984	1	1	0.999057
GO:0010793	regulation of mRNA export from nucleus	2	1.48148	0.0444425	SETD2, THOC2	132	7	20240	43.8095	1	1	0.999057
GO:0010632	regulation of epithelial cell migration	2	1.48148	0.0444425	MACF1, APC	132	7	20240	43.8095	1	1	0.999057
GO:0034728	nucleosome organization	2	1.48148	0.0444425	SETD2, CHD2	132	7	20240	43.8095	1	1	0.999057
GO:1901888	regulation of cell junction assembly	2	1.48148	0.0444425	ROCK1, ROCK2	132	7	20240	43.8095	1	1	0.999057
GO:0006338	chromatin remodeling	5	3.7037	0.0491218	CHD7, ATRX, CHD6, BAZ1B, BPTF	132	212	20240	3.61635	1	1	0.999057
GO:1901018	positive regulation of potassium ion transmembrane transporter activity	2	1.48148	0.0506293	AKAP9, ANK2	132	8	20240	38.3333	1	1	0.999057
GO:1903140	regulation of establishment of endothelial barrier	2	1.48148	0.0567764	ROCK1, ROCK2	132	9	20240	34.0741	1	1	0.999057
GO:0044788	modulation by host of viral process	2	1.48148	0.0567764	EEA1, ROCK2	132	9	20240	34.0741	1	1	0.999057
GO:1990776	response to angiotensin	2	1.48148	0.0567764	ROCK1, ROCK2	132	9	20240	34.0741	1	1	0.999057
GO:0071559	response to transforming growth factor beta	2	1.48148	0.0567764	ROCK1, ROCK2	132	9	20240	34.0741	1	1	0.999057
GO:0039694	viral RNA genome replication	2	1.48148	0.0567764	EEA1, ROCK2	132	9	20240	34.0741	1	1	0.999057
GO:0007266	Rho protein signal transduction	3	2.22222	0.0593958	ROCK1, ROCK2, ARHGAP5	132	61	20240	7.54098	1	1	0.999057
GO:0031047	gene silencing by RNA	3	2.22222	0.0611228	DDX17, AGO3, TNRC6A	132	62	20240	7.41935	1	1	0.999057
GO:0006468	protein phosphorylation	9	6.66667	0.061546	SMG1, SLK, ROCK1, RPS6KB1, WNK1, ROCK2, RB1CC1, PRPF4B, PKN1	132	652	20240	2.11656	1	1	0.999057
GO:0045616	regulation of keratinocyte differentiation	2	1.48148	0.0689523	ROCK1, ROCK2	132	11	20240	27.8788	1	1	0.999057
GO:0007249	I-kappaB kinase/NF-kappaB signaling	3	2.22222	0.070008	ROCK1, ROCK2, ASH1L	132	67	20240	6.86567	1	1	0.999057
GO:0031509	telomeric heterochromatin assembly	2	1.48148	0.0749816	RIF1, ATRX	132	12	20240	25.5556	1	1	0.999057
GO:0018107	peptidyl-threonine phosphorylation	3	2.22222	0.0773999	ROCK1, WNK1, ROCK2	132	71	20240	6.47887	1	1	0.999057
GO:0048667	cell morphogenesis involved in neuron differentiation	2	1.48148	0.0809722	OPHN1, MYCBP2	132	13	20240	23.5897	1	1	0.999057
GO:0090128	regulation of synapse maturation	2	1.48148	0.0809722	ROCK1, ROCK2	132	13	20240	23.5897	1	1	0.999057
GO:0090161	Golgi ribbon formation	2	1.48148	0.0809722	TRIP11, GCC2	132	13	20240	23.5897	1	1	0.999057
GO:0035019	somatic stem cell population maintenance	3	2.22222	0.0830981	NIPBL, APC, RIF1	132	74	20240	6.21622	1	1	0.999057
GO:0033673	negative regulation of kinase activity	2	1.48148	0.0869243	WNK1, HNRNPU	132	14	20240	21.9048	1	1	0.999057
GO:0019827	stem cell population maintenance	3	2.22222	0.0889204	NIPBL, APC, RIF1	132	77	20240	5.97403	1	1	0.999057
GO:0032886	regulation of microtubule-based process	2	1.48148	0.0928381	MACF1, APC	132	15	20240	20.4444	1	1	0.999057
GO:2000288	positive regulation of myoblast proliferation	2	1.48148	0.0928381	MALAT1, PAXBP1	132	15	20240	20.4444	1	1	0.999057
GO:1902275	regulation of chromatin organization	2	1.48148	0.0928381	SETD5, HNRNPU	132	15	20240	20.4444	1	1	0.999057
GO:0034453	microtubule anchoring	2	1.48148	0.0928381	CEP350, GCC2	132	15	20240	20.4444	1	1	0.999057
GO:0050684	regulation of mRNA processing	2	1.48148	0.0987139	SLTM, SAFB2	132	16	20240	19.1667	1	1	0.999057
GO:0060009	Sertoli cell development	2	1.48148	0.0987139	AKAP9, ATRX	132	16	20240	19.1667	1	1	0.999057
GO:0010631	epithelial cell migration	2	1.48148	0.0987139	PKN1, ARHGAP5	132	16	20240	19.1667	1	1	0.999057

## Sheet: Cluster 3 Up BP
Term		Count	%	PValue	Genes	List Total	Pop Hits	Pop Total	Fold Enrichment	Bonferroni	Benjamini	FDR
GO:0006954	inflammatory response	16	14.5455	1.04872e-09	CCL12, SLC11A1, C5AR1, CYBB, CYBA, TMEM258, IL1B, CCL5, CCL4, C3AR1, CCL3, CCL2, NLRP3, CD47, CD14, TLR2	98	410	20240	8.05973	1.34236e-06	1.34236e-06	1.28678e-06
GO:0071347	cellular response to interleukin-1	9	8.18182	5.52631e-09	CEBPB, CCL12, CCL5, SAA3, CFL1, CCL4, CCL3, CCL2, CD47	98	82	20240	22.668	7.07366e-06	2.35789e-06	2.26026e-06
GO:0030593	neutrophil chemotaxis	9	8.18182	5.52631e-09	CCL12, FCER1G, IL1B, CCL5, C5AR1, CCL4, SPP1, CCL3, CCL2	98	82	20240	22.668	7.07366e-06	2.35789e-06	2.26026e-06
GO:0031663	lipopolysaccharide-mediated signaling pathway	7	6.36364	4.72812e-08	NFKBIA, CCL12, IL1B, CCL5, CCL3, CCL2, CD14	98	42	20240	34.4218	6.05182e-05	1.513e-05	1.45035e-05
GO:0071407	cellular response to organic cyclic compound	8	7.27273	6.45584e-08	NFKBIA, CEBPB, CCL12, IL1B, CCL5, CCL3, CCL2, CYBA	98	74	20240	22.3276	8.26314e-05	1.6527e-05	1.58426e-05
GO:0048247	lymphocyte chemotaxis	6	5.45455	3.50698e-07	CCL12, CCL5, CCL4, CCL3, CCL2, CXCL16	98	31	20240	39.9737	0.000448793	7.48156e-05	7.17178e-05
GO:0032760	positive regulation of tumor necrosis factor production	9	8.18182	4.33876e-07	FCER1G, CCL4, CCL3, CYBB, CCL2, CYBA, CD14, H2-D1, TLR2	98	143	20240	12.9984	0.000555207	7.93373e-05	7.60522e-05
GO:0002548	monocyte chemotaxis	6	5.45455	8.79475e-07	CCL12, RPS19, CCL5, CCL4, CCL3, CCL2	98	37	20240	33.4915	0.0011251	0.000140716	0.00013489
GO:0006955	immune response	14	12.7273	1.29648e-06	CLEC4A1, CCL12, CLEC4A3, CLEC4A2, CTSL, FTH1, IL1B, CCL5, CCL4, CCL3, CCL2, B2M, H2-D1, TLR2	98	524	20240	5.51799	0.00165812	0.000184389	0.000176754
GO:0006935	chemotaxis	8	7.27273	4.11317e-06	CCL12, CCL5, C5AR1, CCL4, C3AR1, CCL3, CCL2, CXCL16	98	136	20240	12.1489	0.00525104	0.000526486	0.000504686
GO:0048245	eosinophil chemotaxis	5	4.54545	6.83395e-06	CCL12, CCL5, CCL4, CCL3, CCL2	98	26	20240	39.7174	0.00870933	0.000795223	0.000762296
GO:0071356	cellular response to tumor necrosis factor	8	7.27273	7.51262e-06	NFKBIA, CCL12, CCL5, CFL1, CCL4, CCL3, CCL2, CYBA	98	149	20240	11.0889	0.00957011	0.000798364	0.000765307
GO:0050729	positive regulation of inflammatory response	7	6.36364	8.10839e-06	NFKBIA, CEBPB, IL1B, CCL3, NLRP3, CD47, TLR2	98	99	20240	14.6032	0.0103251	0.000798364	0.000765307
GO:0002376	immune system process	13	11.8182	1.32531e-05	IFITM3, CLEC4A2, FCER1G, PIRB, FCGR4, POLR3D, LCN2, NLRP3, CD14, SLC15A3, B2M, H2-D1, TLR2	98	553	20240	4.85515	0.016821	0.00121171	0.00116154
GO:0042590	antigen processing and presentation of exogenous peptide antigen via MHC class I	4	3.63636	1.71225e-05	CLEC4A1, CLEC4A3, CLEC4A2, FCER1G	98	11	20240	75.102	0.0216785	0.00146112	0.00140062
GO:0071346	cellular response to interferon-gamma	7	6.36364	1.91455e-05	CCL12, CCL5, CCL4, CCL3, CCL2, CD47, TLR2	98	115	20240	12.5714	0.0242086	0.00153164	0.00146822
GO:0050766	positive regulation of phagocytosis	6	5.45455	2.82563e-05	HSPA8, FCER1G, IL1B, SLC11A1, CYBA, CD47	98	74	20240	16.7457	0.0355223	0.00212753	0.00203944
GO:0001818	negative regulation of cytokine production	5	4.54545	4.38123e-05	SRGN, CLEC4A1, CLEC4A3, CLEC4A2, SLC11A1	98	41	20240	25.1867	0.0545374	0.00311554	0.00298654
GO:0009617	response to bacterium	9	8.18182	9.56491e-05	SAA3, SLC11A1, LCN2, CCL2, CD47, CD14, GAS5, FKBP5, TLR2	98	299	20240	6.21664	0.115238	0.00644373	0.00617692
GO:0071222	cellular response to lipopolysaccharide	9	8.18182	0.000112242	CEBPB, XBP1, FCGR4, IL1B, CCL2, NLRP3, CD14, B2M, CXCL16	98	306	20240	6.07443	0.133833	0.0071835	0.00688606
GO:0070098	chemokine-mediated signaling pathway	5	4.54545	0.000150401	CCL12, CCL5, CCL4, CCL3, CCL2	98	56	20240	18.4402	0.175129	0.00916732	0.00878774
GO:0070374	positive regulation of ERK1 and ERK2 cascade	8	7.27273	0.000164996	CCL12, IL1B, CCL5, C5AR1, CCL4, CCL3, CCL2, TLR2	98	242	20240	6.82746	0.190397	0.00959815	0.00920072
GO:0014823	response to activity	5	4.54545	0.000172467	HSPA8, CFL1, CCL2, CYBA, SOD2	98	58	20240	17.8044	0.198104	0.00959815	0.00920072
GO:0000165	MAPK cascade	6	5.45455	0.000212529	CCL12, IL1B, CCL5, SLC11A1, CCL3, CCL2	98	113	20240	10.9662	0.238196	0.0111915	0.0107281
GO:0002470	plasmacytoid dendritic cell antigen processing and presentation	3	2.72727	0.000225196	CLEC4A1, CLEC4A3, CLEC4A2	98	5	20240	123.918	0.250451	0.0111915	0.0107281
GO:0010759	positive regulation of macrophage chemotaxis	4	3.63636	0.000227328	CCL5, C5AR1, C3AR1, CCL2	98	25	20240	33.0449	0.252494	0.0111915	0.0107281
GO:0006874	cellular calcium ion homeostasis	6	5.45455	0.000270357	CCL12, CCL5, SPP1, CCL3, CCL2, HERPUD1	98	119	20240	10.4133	0.292561	0.0128169	0.0122862
GO:0030335	positive regulation of cell migration	8	7.27273	0.000307374	XBP1, DAB2, IL1B, CCL5, C3AR1, CCL3, SOD2, CXCL16	98	268	20240	6.16509	0.325308	0.0140514	0.0134696
GO:0043491	protein kinase B signaling	5	4.54545	0.000319158	CCL12, IL1B, CCL5, CCL3, CCL2	98	68	20240	15.1861	0.335412	0.014087	0.0135037
GO:0043066	negative regulation of apoptotic process	12	10.9091	0.000366738	EIF5A, XBP1, PRDX5, DAB2, CDKN1A, CITED2, DUSP1, SPP1, SOD2, BCL2A1A, BCL2A1B, IER3	98	671	20240	3.69354	0.374692	0.0156475	0.0149996
GO:0006898	receptor-mediated endocytosis	5	4.54545	0.000397332	IFITM3, MSR1, DAB2, CD14, CXCL16	98	72	20240	14.3424	0.398715	0.016406	0.0157266
GO:0006826	iron ion transport	4	3.63636	0.000435115	SLC11A1, FTH1, CP, B2M	98	31	20240	26.6491	0.427114	0.0174046	0.016684
GO:0036037	CD8-positive, alpha-beta T cell activation	4	3.63636	0.000478464	CLEC4A1, CLEC4A3, CLEC4A2, H2-D1	98	32	20240	25.8163	0.458049	0.0183836	0.0176224
GO:1901224	positive regulation of NIK/NF-kappaB signaling	5	4.54545	0.000488313	IL1B, NLRP3, GLRX, CD14, TLR2	98	76	20240	13.5875	0.464842	0.0183836	0.0176224
GO:0034341	response to interferon-gamma	4	3.63636	0.000524487	IFITM3, CCL5, SLC11A1, CXCL16	98	33	20240	25.034	0.489069	0.0190975	0.0183068
GO:0050830	defense response to Gram-positive bacterium	7	6.36364	0.000537118	IL1B, LYZ2, C5AR1, NLRP3, B2M, H2-D1, TLR2	98	211	20240	6.85173	0.497267	0.0190975	0.0183068
GO:0045730	respiratory burst	3	2.72727	0.000624657	SLC11A1, CYBB, CYBA	98	8	20240	77.449	0.550586	0.0216097	0.020715
GO:0055072	iron ion homeostasis	4	3.63636	0.000679266	SLC11A1, SOD2, CP, B2M	98	36	20240	22.9478	0.580946	0.0228805	0.0219331
GO:0010628	positive regulation of gene expression	11	10	0.000703678	HSPA8, CEBPB, CITED2, IL1B, CCL5, SLC11A1, ID2, LCN2, CCL3, CCL2, TLR2	98	612	20240	3.71215	0.593847	0.0230951	0.0221388
GO:0045087	innate immune response	12	10.9091	0.000731427	IFITM3, CLEC4A2, FCER1G, POLR3D, LCN2, CYBB, NLRP3, CYBA, CD14, SLC15A3, B2M, TLR2	98	729	20240	3.39968	0.60803	0.0234057	0.0224365
GO:0043615	astrocyte cell migration	3	2.72727	0.000800622	CCL12, CCL3, CCL2	98	9	20240	68.8435	0.641278	0.024995	0.0239601
GO:0050665	hydrogen peroxide biosynthetic process	3	2.72727	0.000997653	CYBB, CYBA, SOD2	98	10	20240	61.9592	0.721304	0.0304047	0.0291457
GO:0045671	negative regulation of osteoclast differentiation	4	3.63636	0.00106968	PILRB1, CCL3, PIRB, CLEC2D	98	42	20240	19.6696	0.745873	0.0318416	0.0305232
GO:0045766	positive regulation of angiogenesis	6	5.45455	0.00110027	XBP1, IL1B, CCL5, C5AR1, C3AR1, CYBB	98	162	20240	7.64928	0.755641	0.0320078	0.0306825
GO:0002237	response to molecule of bacterial origin	3	2.72727	0.00121555	CD14, B2M, TLR2	98	11	20240	56.3265	0.789201	0.0345756	0.033144
GO:0097192	extrinsic apoptotic signaling pathway in absence of ligand	4	3.63636	0.00148495	IL1B, LCN2, BCL2A1A, BCL2A1B	98	47	20240	17.5771	0.850753	0.0413204	0.0396095
GO:0032496	response to lipopolysaccharide	6	5.45455	0.00192959	NFKBIA, CEBPB, IL1B, SLC11A1, SOD2, TLR2	98	184	20240	6.73469	0.915606	0.0525505	0.0503745
GO:0032753	positive regulation of interleukin-4 production	4	3.63636	0.0019892	CEBPB, FCER1G, NLRP3, H2-D1	98	52	20240	15.887	0.921818	0.0530454	0.050849
GO:0032755	positive regulation of interleukin-6 production	5	4.54545	0.00207328	XBP1, FCER1G, IL1B, CYBA, TLR2	98	112	20240	9.22012	0.92981	0.0541592	0.0519166
GO:0006606	protein import into nucleus	5	4.54545	0.00243026	NFKBIA, HSPA8, CDKN1A, CFL1, RAN	98	117	20240	8.82609	0.9556	0.0622146	0.0596386
GO:0043524	negative regulation of neuron apoptotic process	6	5.45455	0.00253875	CEBPB, CCL12, C5AR1, CCL2, MT1, SOD2	98	196	20240	6.32237	0.96137	0.0637176	0.0610793
GO:0045471	response to ethanol	5	4.54545	0.00291189	HSPA8, PSMD14, CCL2, NLRP3, CD14	98	123	20240	8.39555	0.976071	0.0710208	0.0680801
GO:0048246	macrophage chemotaxis	3	2.72727	0.00294995	CCL12, CCL3, CCL2	98	17	20240	36.4466	0.977212	0.0710208	0.0680801
GO:0008630	intrinsic apoptotic signaling pathway in response to DNA damage	4	3.63636	0.00299619	SOD2, BCL2A1A, BCL2A1B, IER3	98	60	20240	13.7687	0.978525	0.0710208	0.0680801
GO:0001666	response to hypoxia	6	5.45455	0.00321016	CITED2, DDIT4, CCL2, CYBA, SOD2, TLR2	98	207	20240	5.98639	0.983684	0.0747091	0.0716157
GO:0061760	antifungal innate immune response	3	2.72727	0.00368608	CLEC4A1, CLEC4A3, CLEC4A2	98	19	20240	32.6101	0.991146	0.0842533	0.0807647
GO:0042554	superoxide anion generation	3	2.72727	0.00408291	CYBB, CYBA, SOD2	98	20	20240	30.9796	0.994683	0.0901055	0.0863746
GO:0006801	superoxide metabolic process	3	2.72727	0.00408291	CYBB, CYBA, SOD2	98	20	20240	30.9796	0.994683	0.0901055	0.0863746
GO:0009410	response to xenobiotic stimulus	7	6.36364	0.00422267	HSPA8, XBP1, LCN2, CCL3, CYBB, CYBA, SOD2	98	317	20240	4.56061	0.995557	0.0904351	0.0866905
GO:0007166	cell surface receptor signaling pathway	6	5.45455	0.00423914	MILR1, MS4A6B, FCER1G, FCGR4, MS4A6D, MS4A6C	98	221	20240	5.60717	0.99565	0.0904351	0.0866905
GO:0045785	positive regulation of cell adhesion	4	3.63636	0.00501035	CD63, DAB2, CCL5, CCL2	98	72	20240	11.4739	0.998387	0.105135	0.100782
GO:0002687	positive regulation of leukocyte migration	3	2.72727	0.00634717	CCL12, CCL2, TLR2	98	25	20240	24.7837	0.999711	0.131038	0.125612
GO:2000353	positive regulation of endothelial cell apoptotic process	3	2.72727	0.00685476	XBP1, CCL12, CCL2	98	26	20240	23.8305	0.99985	0.139271	0.133505
GO:0010575	positive regulation of vascular endothelial growth factor production	3	2.72727	0.00738017	IL1B, C5AR1, C3AR1	98	27	20240	22.9478	0.999924	0.145333	0.139315
GO:0071353	cellular response to interleukin-4	3	2.72727	0.00738017	XBP1, TUBA1B, RPS2	98	27	20240	22.9478	0.999924	0.145333	0.139315
GO:0001836	release of cytochrome c from mitochondria	3	2.72727	0.00792322	SOD2, BCL2A1A, BCL2A1B	98	28	20240	22.1283	0.999962	0.151369	0.145101
GO:0022409	positive regulation of cell-cell adhesion	3	2.72727	0.00792322	CITED2, CCL2, CD47	98	28	20240	22.1283	0.999962	0.151369	0.145101
GO:0048661	positive regulation of smooth muscle cell proliferation	4	3.63636	0.00819373	CCL5, ID2, C3AR1, CYBA	98	86	20240	9.60607	0.999973	0.152	0.145706
GO:0071466	cellular response to xenobiotic stimulus	4	3.63636	0.00819373	RNF149, IL1B, CCL4, CCL2	98	86	20240	9.60607	0.999973	0.152	0.145706
GO:0001819	positive regulation of cytokine production	4	3.63636	0.00845729	IL1B, SLC11A1, CD14, TLR2	98	87	20240	9.49566	0.999981	0.15247	0.146156
GO:0071333	cellular response to glucose stimulus	4	3.63636	0.00845729	XBP1, CCL2, CYBA, GLRX	98	87	20240	9.49566	0.999981	0.15247	0.146156
GO:0034976	response to endoplasmic reticulum stress	4	3.63636	0.00956118	CEBPB, XBP1, TMEM258, HERPUD1	98	91	20240	9.07827	0.999995	0.167031	0.160115
GO:0071276	cellular response to cadmium ion	3	2.72727	0.00965649	HSPA8, CYBB, MT1	98	31	20240	19.9868	0.999996	0.167031	0.160115
GO:0060586	multicellular organismal iron ion homeostasis	3	2.72727	0.00965649	SLC11A1, SOD2, B2M	98	31	20240	19.9868	0.999996	0.167031	0.160115
GO:0007204	positive regulation of cytosolic calcium ion concentration	5	4.54545	0.0106292	EIF5A, IL1B, C5AR1, C3AR1, CCL3	98	178	20240	5.80142	0.999999	0.181405	0.173894
GO:0051602	response to electrical stimulus	3	2.72727	0.0115422	XBP1, CD14, SOD2	98	34	20240	18.2233	1	0.191871	0.183926
GO:0090023	positive regulation of neutrophil chemotaxis	3	2.72727	0.0115422	IL1B, C5AR1, C3AR1	98	34	20240	18.2233	1	0.191871	0.183926
GO:0045807	positive regulation of endocytosis	3	2.72727	0.0122039	CD63, DAB2, CD14	98	35	20240	17.7026	1	0.197734	0.189546
GO:0034612	response to tumor necrosis factor	3	2.72727	0.0122039	CCL5, CD14, CXCL16	98	35	20240	17.7026	1	0.197734	0.189546
GO:0032635	interleukin-6 production	3	2.72727	0.0128818	FCER1G, IL1B, TLR2	98	36	20240	17.2109	1	0.203564	0.195135
GO:0032570	response to progesterone	3	2.72727	0.0128818	HSPA8, CCL2, TLR2	98	36	20240	17.2109	1	0.203564	0.195135
GO:0010934	macrophage cytokine production	3	2.72727	0.0135758	IL1B, NLRP3, TLR2	98	37	20240	16.7457	1	0.210529	0.201812
GO:0043547	positive regulation of GTPase activity	5	4.54545	0.0137159	CCL12, CCL5, CCL4, CCL3, CCL2	98	192	20240	5.3784	1	0.210529	0.201812
GO:2000379	positive regulation of reactive oxygen species metabolic process	3	2.72727	0.0142857	EIF5A, CDKN1A, LCN2	98	38	20240	16.305	1	0.210529	0.201812
GO:0071727	cellular response to triacyl bacterial lipopeptide	2	1.81818	0.0143094	CD14, TLR2	98	3	20240	137.687	1	0.210529	0.201812
GO:1904845	cellular response to L-glutamine	2	1.81818	0.0143094	CYBB, CYBA	98	3	20240	137.687	1	0.210529	0.201812
GO:2000502	negative regulation of natural killer cell chemotaxis	2	1.81818	0.0143094	CCL12, CCL2	98	3	20240	137.687	1	0.210529	0.201812
GO:0006915	apoptotic process	9	8.18182	0.014658	SRGN, XBP1, DAB2, GPR65, C5AR1, DDIT4, LCN2, CD47, BCL2A1A	98	666	20240	2.79095	1	0.213207	0.204379
GO:0050870	positive regulation of T cell activation	3	2.72727	0.0157527	CCL2, CD47, B2M	98	40	20240	15.4898	1	0.226373	0.216999
GO:0030307	positive regulation of cell growth	4	3.63636	0.0159168	H3F3B, CFL1, CYBA, CXCL16	98	110	20240	7.5102	1	0.226373	0.216999
GO:0008285	negative regulation of cell proliferation	7	6.36364	0.0179025	IFITM3, CDKN1A, DUSP1, IL1B, FTH1, SOD2, TLR2	98	433	20240	3.33883	1	0.251815	0.241388
GO:0071726	cellular response to diacyl bacterial lipopeptide	2	1.81818	0.019034	CD14, TLR2	98	4	20240	103.265	1	0.264821	0.253856
GO:2000134	negative regulation of G1/S transition of mitotic cell cycle	3	2.72727	0.0205189	CCL12, CDKN1A, CCL2	98	46	20240	13.4694	1	0.282411	0.270717
GO:0006887	exocytosis	4	3.63636	0.0213511	CCL12, CCL5, TNFAIP2, CCL3	98	123	20240	6.71644	1	0.290739	0.2787
GO:0007010	cytoskeleton organization	4	3.63636	0.0236793	CCL12, CFL1, CCL3, CCL2	98	128	20240	6.45408	1	0.31322	0.300251
GO:0048002	antigen processing and presentation of peptide antigen	2	1.81818	0.0237362	CTSL, SLC11A1	98	5	20240	82.6122	1	0.31322	0.300251
GO:2000503	positive regulation of natural killer cell chemotaxis	2	1.81818	0.0237362	CCL5, CCL3	98	5	20240	82.6122	1	0.31322	0.300251
GO:0045429	positive regulation of nitric oxide biosynthetic process	3	2.72727	0.0258064	IL1B, SOD2, TLR2	98	52	20240	11.9152	1	0.333659	0.319843
GO:0030968	endoplasmic reticulum unfolded protein response	3	2.72727	0.0258064	XBP1, SERP1, HERPUD1	98	52	20240	11.9152	1	0.333659	0.319843
GO:0050829	defense response to Gram-negative bacterium	4	3.63636	0.0266479	RPS19, LYZ2, SLC11A1, B2M	98	134	20240	6.16509	1	0.341093	0.32697
GO:0070487	monocyte aggregation	2	1.81818	0.0284161	IL1B, CD47	98	6	20240	68.8435	1	0.352435	0.337842
GO:1904044	response to aldosterone	2	1.81818	0.0284161	CYBB, CYBA	98	6	20240	68.8435	1	0.352435	0.337842
GO:0002521	leukocyte differentiation	2	1.81818	0.0284161	CITED2, ID2	98	6	20240	68.8435	1	0.352435	0.337842
GO:0045600	positive regulation of fat cell differentiation	3	2.72727	0.0286354	CEBPB, XBP1, ID2	98	55	20240	11.2653	1	0.352435	0.337842
GO:0051607	defense response to virus	5	4.54545	0.0295117	IFITM3, POLR3D, DDIT4, NLRP3, TLR2	98	243	20240	4.2496	1	0.357492	0.342689
GO:0006879	cellular iron ion homeostasis	3	2.72727	0.0296048	SLC11A1, FTH1, B2M	98	56	20240	11.0641	1	0.357492	0.342689
GO:0051496	positive regulation of stress fiber assembly	3	2.72727	0.0315824	SDC4, GPR65, CD47	98	58	20240	10.6826	1	0.377809	0.362165
GO:0031622	positive regulation of fever generation	2	1.81818	0.0330738	IL1B, CCL5	98	7	20240	59.0087	1	0.391985	0.375755
GO:0001916	positive regulation of T cell mediated cytotoxicity	3	2.72727	0.0346438	HSPA8, B2M, H2-D1	98	61	20240	10.1572	1	0.403127	0.386435
GO:0032757	positive regulation of interleukin-8 production	3	2.72727	0.0346438	IL1B, CD14, TLR2	98	61	20240	10.1572	1	0.403127	0.386435
GO:0032984	macromolecular complex disassembly	2	1.81818	0.0377094	HSPA8, DDIT4	98	8	20240	51.6327	1	0.42715	0.409464
GO:0071224	cellular response to peptidoglycan	2	1.81818	0.0377094	NLRP3, TLR2	98	8	20240	51.6327	1	0.42715	0.409464
GO:1905563	negative regulation of vascular endothelial cell proliferation	2	1.81818	0.0377094	CCL12, CCL2	98	8	20240	51.6327	1	0.42715	0.409464
GO:0032731	positive regulation of interleukin-1 beta production	3	2.72727	0.0388967	CCL3, NLRP3, TLR2	98	65	20240	9.53218	1	0.436735	0.418651
GO:0010629	negative regulation of gene expression	6	5.45455	0.0418224	MSR1, CDKN1A, CITED2, IL1B, ID2, CCL3	98	396	20240	3.12925	1	0.45167	0.432968
GO:0032494	response to peptidoglycan	2	1.81818	0.0423229	C5AR1, TLR2	98	9	20240	45.8957	1	0.45167	0.432968
GO:0030836	positive regulation of actin filament depolymerization	2	1.81818	0.0423229	PLEK, CFL1	98	9	20240	45.8957	1	0.45167	0.432968
GO:1904783	positive regulation of NMDA glutamate receptor activity	2	1.81818	0.0423229	CFL1, CCL2	98	9	20240	45.8957	1	0.45167	0.432968
GO:0034351	negative regulation of glial cell apoptotic process	2	1.81818	0.0423229	CCL12, CCL2	98	9	20240	45.8957	1	0.45167	0.432968
GO:0019221	cytokine-mediated signaling pathway	4	3.63636	0.0423441	CCL12, IL1B, CCL2, PIRB	98	161	20240	5.1312	1	0.45167	0.432968
GO:0030218	erythrocyte differentiation	3	2.72727	0.0433372	RPS19, ID2, SLC25A5	98	69	20240	8.97959	1	0.458443	0.439461
GO:0043065	positive regulation of apoptotic process	6	5.45455	0.0441248	EIF5A, DUSP1, IL1B, LCN2, BCL2A1A, BCL2A1B	98	402	20240	3.08255	1	0.462949	0.44378
GO:0071223	cellular response to lipoteichoic acid	2	1.81818	0.0469146	CD14, TLR2	98	10	20240	41.3061	1	0.480406	0.460514
GO:0002752	cell surface pattern recognition receptor signaling pathway	2	1.81818	0.0469146	CD14, TLR2	98	10	20240	41.3061	1	0.480406	0.460514
GO:0000055	ribosomal large subunit export from nucleus	2	1.81818	0.0469146	RRS1, RAN	98	10	20240	41.3061	1	0.480406	0.460514
GO:0032720	negative regulation of tumor necrosis factor production	3	2.72727	0.0491387	CLEC4A1, CLEC4A3, CLEC4A2	98	74	20240	8.37286	1	0.499186	0.478517
GO:1902570	protein localization to nucleolus	2	1.81818	0.0514846	RRS1, RAN	98	11	20240	37.551	1	0.514846	0.493528
GO:0010818	T cell chemotaxis	2	1.81818	0.0514846	CCL3, CXCL16	98	11	20240	37.551	1	0.514846	0.493528
GO:0001525	angiogenesis	5	4.54545	0.0529828	XBP1, CCL12, TNFAIP2, CCL2, CD47	98	294	20240	3.51243	1	0.525721	0.503953
GO:0045669	positive regulation of osteoblast differentiation	3	2.72727	0.0552038	IFITM3, CEBPB, CLIC1	98	79	20240	7.84293	1	0.539263	0.516934
GO:0032675	regulation of interleukin-6 production	2	1.81818	0.0560328	CEBPB, CD47	98	12	20240	34.4218	1	0.539263	0.516934
GO:0002474	antigen processing and presentation of peptide antigen via MHC class I	2	1.81818	0.0560328	B2M, H2-D1	98	12	20240	34.4218	1	0.539263	0.516934
GO:0043922	negative regulation by host of viral transcription	2	1.81818	0.0560328	CCL5, CCL3	98	12	20240	34.4218	1	0.539263	0.516934
GO:0006412	translation	5	4.54545	0.0573753	EIF5A, RPS9, RPS19, RPS2, EIF1	98	302	20240	3.41938	1	0.547084	0.524431
GO:0007267	cell-cell signaling	3	2.72727	0.0577003	CCL12, CCL5, CCL3	98	81	20240	7.64928	1	0.547084	0.524431
GO:0014070	response to organic cyclic compound	3	2.72727	0.0602354	CTSL, CFL1, NLRP3	98	83	20240	7.46496	1	0.561711	0.538452
GO:1901029	negative regulation of mitochondrial outer membrane permeabilization involved in apoptotic signaling pathway	2	1.81818	0.0605594	SLC25A5, IER3	98	13	20240	31.7739	1	0.561711	0.538452
GO:0002430	complement receptor mediated signaling pathway	2	1.81818	0.0605594	C5AR1, C3AR1	98	13	20240	31.7739	1	0.561711	0.538452
GO:0009636	response to toxic substance	3	2.72727	0.0628084	CCL5, CCL3, TLR2	98	85	20240	7.28932	1	0.561981	0.538712
GO:2000343	positive regulation of chemokine (C-X-C motif) ligand 2 production	2	1.81818	0.0650646	POSTN, CCL5	98	14	20240	29.5044	1	0.561981	0.538712
GO:0048711	positive regulation of astrocyte differentiation	2	1.81818	0.0650646	IL1B, ID2	98	14	20240	29.5044	1	0.561981	0.538712
GO:0097242	beta-amyloid clearance	2	1.81818	0.0650646	MSR1, C5AR1	98	14	20240	29.5044	1	0.561981	0.538712
GO:0045744	negative regulation of G-protein coupled receptor protein signaling pathway	2	1.81818	0.0650646	CCL5, PLEK	98	14	20240	29.5044	1	0.561981	0.538712
GO:0001775	cell activation	2	1.81818	0.0650646	CCL3, TLR2	98	14	20240	29.5044	1	0.561981	0.538712
GO:0033598	mammary gland epithelial cell proliferation	2	1.81818	0.0650646	CEBPB, ID2	98	14	20240	29.5044	1	0.561981	0.538712
GO:0007252	I-kappaB phosphorylation	2	1.81818	0.0650646	SAA3, TLR2	98	14	20240	29.5044	1	0.561981	0.538712
GO:0032729	positive regulation of interferon-gamma production	3	2.72727	0.0654181	IL1B, SLC11A1, CD14	98	87	20240	7.12175	1	0.561981	0.538712
GO:0070373	negative regulation of ERK1 and ERK2 cascade	3	2.72727	0.0654181	XBP1, DAB2, DUSP1	98	87	20240	7.12175	1	0.561981	0.538712
GO:0043525	positive regulation of neuron apoptotic process	3	2.72727	0.0654181	IL1B, LCN2, CCL3	98	87	20240	7.12175	1	0.561981	0.538712
GO:0010977	negative regulation of neuron projection development	3	2.72727	0.0680639	DAB2, B2M, H2-D1	98	89	20240	6.96171	1	0.578064	0.554129
GO:0006968	cellular defense response	2	1.81818	0.0695483	B2M, CLEC2D	98	15	20240	27.5374	1	0.578064	0.554129
GO:0042119	neutrophil activation	2	1.81818	0.0695483	FCGR4, CCL5	98	15	20240	27.5374	1	0.578064	0.554129
GO:0043067	regulation of programmed cell death	2	1.81818	0.0695483	CCL5, CCL3	98	15	20240	27.5374	1	0.578064	0.554129
GO:2001046	positive regulation of integrin-mediated signaling pathway	2	1.81818	0.0695483	CD63, DAB2	98	15	20240	27.5374	1	0.578064	0.554129
GO:0034599	cellular response to oxidative stress	3	2.72727	0.0707446	XBP1, PRDX5, SOD2	98	91	20240	6.8087	1	0.584214	0.560023
GO:0032611	interleukin-1 beta production	2	1.81818	0.0740108	IL1B, NLRP3	98	16	20240	25.8163	1	0.607268	0.582124
GO:0002181	cytoplasmic translation	3	2.72727	0.0748294	RPS9, RPS19, RPS2	98	94	20240	6.5914	1	0.610074	0.584813
GO:0071498	cellular response to fluid shear stress	2	1.81818	0.0784521	XBP1, SPP1	98	17	20240	24.2977	1	0.624103	0.598261
GO:0048143	astrocyte activation	2	1.81818	0.0784521	IL1B, C5AR1	98	17	20240	24.2977	1	0.624103	0.598261
GO:0045944	positive regulation of transcription from RNA polymerase II promoter	11	10	0.0784607	NFKBIA, CEBPB, XBP1, DAB2, CITED2, IL1B, SLC11A1, CCL3, NLRP3, IER2, TLR2	98	1257	20240	1.80735	1	0.624103	0.598261
GO:0031647	regulation of protein stability	3	2.72727	0.078988	HSPA8, XBP1, RNF149	98	97	20240	6.38754	1	0.624103	0.598261
GO:0031640	killing of cells of other organism	3	2.72727	0.078988	CCL12, RPS19, LYZ2	98	97	20240	6.38754	1	0.624103	0.598261
GO:0009615	response to virus	3	2.72727	0.0818	IFITM3, CFL1, LCN2	98	99	20240	6.2585	1	0.635189	0.608889
GO:0030595	leukocyte chemotaxis	2	1.81818	0.0828724	CCL4, CCL3	98	18	20240	22.9478	1	0.635189	0.608889
GO:2000279	negative regulation of DNA biosynthetic process	2	1.81818	0.0828724	CDKN1A, DUSP1	98	18	20240	22.9478	1	0.635189	0.608889
GO:0045820	negative regulation of glycolytic process	2	1.81818	0.0828724	DDIT4, IER3	98	18	20240	22.9478	1	0.635189	0.608889
GO:1902236	negative regulation of endoplasmic reticulum stress-induced intrinsic apoptotic signaling pathway	2	1.81818	0.0828724	XBP1, HERPUD1	98	18	20240	22.9478	1	0.635189	0.608889
GO:0071354	cellular response to interleukin-6	2	1.81818	0.0872716	CFL1, CCL2	98	19	20240	21.7401	1	0.657104	0.629896
GO:1903428	positive regulation of reactive oxygen species biosynthetic process	2	1.81818	0.0872716	LCN2, CYBA	98	19	20240	21.7401	1	0.657104	0.629896
GO:0000028	ribosomal small subunit assembly	2	1.81818	0.0872716	RPS19, RPS2	98	19	20240	21.7401	1	0.657104	0.629896
GO:0008284	positive regulation of cell proliferation	7	6.36364	0.0885678	XBP1, MARCKSL1, RPS9, IL1B, ID2, CD47, SLC25A5	98	643	20240	2.24839	1	0.662046	0.634633
GO:0001889	liver development	3	2.72727	0.0889624	XBP1, CITED2, SOD2	98	104	20240	5.95761	1	0.662046	0.634633
GO:0015031	protein transport	7	6.36364	0.0900804	EIF5A, CD63, XBP1, DAB2, SERP1, SLC15A3, RAN	98	646	20240	2.23795	1	0.666491	0.638894
GO:0032623	interleukin-2 production	2	1.81818	0.0916499	FCER1G, SLC11A1	98	20	20240	20.6531	1	0.670354	0.642597
GO:0034755	iron ion transmembrane transport	2	1.81818	0.0916499	SLC11A1, LCN2	98	20	20240	20.6531	1	0.670354	0.642597
GO:0001649	osteoblast differentiation	3	2.72727	0.0933465	H3F3B, SPP1, CCL3	98	107	20240	5.79058	1	0.675048	0.647097
GO:0007229	integrin-mediated signaling pathway	3	2.72727	0.0933465	FCER1G, PLEK, CD47	98	107	20240	5.79058	1	0.675048	0.647097
GO:0042060	wound healing	3	2.72727	0.0948218	CDKN1A, SDC4, SLC11A1	98	108	20240	5.73696	1	0.681864	0.653631
GO:0042026	protein refolding	2	1.81818	0.0960075	HSPA8, B2M	98	21	20240	19.6696	1	0.68272	0.654451
GO:0001913	T cell mediated cytotoxicity	2	1.81818	0.0960075	B2M, H2-D1	98	21	20240	19.6696	1	0.68272	0.654451

## Sheet: Cluster 4 Up BP
Term		Count	%	PValue	Genes	List Total	Pop Hits	Pop Total	Fold Enrichment	Bonferroni	Benjamini	FDR
GO:0006260	DNA replication	12	6.45161	9.03416e-09	POLB, POLA1, RRM1, FEN1, CHAF1A, PCNA, LIG1, NASP, PRIM1, MCM3, MCM6, DTL	179	120	20240	11.3073	1.24219e-05	8.31395e-06	8.23534e-06
GO:1904851	positive regulation of establishment of protein localization to telomere	6	3.22581	1.2093e-08	CCT6A, CCT3, CCT2, TCP1, CCT8, CCT7	179	10	20240	67.8436	1.66278e-05	8.31395e-06	8.23534e-06
GO:0006974	cellular response to DNA damage stimulus	21	11.2903	4.52232e-08	TOP2A, FEN1, CBX5, PCNA, UBE2B, LIG1, ATAD5, PARP1, UHRF1, ACTL6A, NSMCE2, ASH2L, BRCA2, ZMPSTE24, POLB, ETAA1, CHAF1A, RPS3, TOPBP1, DTL, ASF1A	179	528	20240	4.49721	6.21799e-05	2.07273e-05	2.05313e-05
GO:0006281	DNA repair	18	9.67742	6.97365e-08	WDHD1, RRM1, FEN1, PCNA, UBE2B, LIG1, PARP1, UHRF1, ACTL6A, NSMCE2, BRCA2, ZMPSTE24, POLB, ETAA1, CHAF1A, RPS3, TOPBP1, ASF1A	179	391	20240	5.20539	9.58831e-05	2.39719e-05	2.37453e-05
GO:0050821	protein stabilization	12	6.45161	1.90259e-06	CCT6A, CCT3, CCT2, UBE2B, BAG1, TCP1, HPS4, ATP1B3, CCT8, TBL1X, CCT7, IFI30	179	203	20240	6.6841	0.00261264	0.000523211	0.000518265
GO:0006457	protein folding	9	4.83871	9.22308e-06	CCT6A, PDIA3, CCT3, CCT2, NUDCD2, TCP1, CCT8, CCT7, HSPE1	179	117	20240	8.69789	0.0126017	0.00211362	0.00209364
GO:0032212	positive regulation of telomere maintenance via telomerase	6	3.22581	1.12527e-05	CCT6A, CCT3, CCT2, TCP1, CCT8, CCT7	179	34	20240	19.954	0.0153535	0.00221035	0.00218946
GO:0007049	cell cycle	19	10.2151	1.91831e-05	HELLS, LIG1, UHRF1, GMNN, NCAPG2, NSMCE2, CLTA, BRCA2, SMC2, RBL1, STAG2, CHAF1A, NASP, HAUS8, CDK4, RPS3, MCM3, MCM6, BUB3	179	653	20240	3.29002	0.0260322	0.00301418	0.00298568
GO:0061077	chaperone-mediated protein folding	6	3.22581	1.97292e-05	CCT6A, CCT3, CCT2, TCP1, CCT8, CCT7	179	38	20240	17.8536	0.0267632	0.00301418	0.00298568
GO:0006325	chromatin organization	14	7.52688	2.30193e-05	DNMT1, CBX5, UBE2B, UHRF1, ACTL6A, ATAD2, ASH2L, DEK, CTCF, NR3C1, ZMPSTE24, RBL1, ASF1A, EZH2	179	367	20240	4.3134	0.0311563	0.00316516	0.00313523
GO:0010216	maintenance of DNA methylation	4	2.15054	5.40356e-05	HELLS, DNMT1, UHRF1, CTCF	179	9	20240	50.2545	0.0716077	0.00669709	0.00663377
GO:1901998	toxin transport	6	3.22581	6.26875e-05	CCT6A, CCT3, CCT2, TCP1, CCT8, CCT7	179	48	20240	14.1341	0.0825875	0.00669709	0.00663377
GO:0006270	DNA replication initiation	5	2.68817	6.33179e-05	POLA1, PRIM1, MCM3, MCM6, TOPBP1	179	25	20240	22.6145	0.0833824	0.00669709	0.00663377
GO:0007339	binding of sperm to zona pellucida	6	3.22581	8.41877e-05	CCT6A, CCT3, CCT2, TCP1, CCT8, CCT7	179	51	20240	13.3027	0.109314	0.00826843	0.00819026
GO:0044027	hypermethylation of CpG island	4	2.15054	0.000138794	HELLS, DNMT1, UHRF1, CTCF	179	12	20240	37.6909	0.173747	0.0127227	0.0126025
GO:1900016	negative regulation of cytokine production involved in inflammatory response	4	2.15054	0.00133401	PYCARD, SIRPA, TREM2, EZH2	179	25	20240	18.0916	0.840465	0.109778	0.10874
GO:0008152	metabolic process	8	4.30108	0.00135725	RRM1, DNMT1, PKM, PARP1, LYZ2, HEXB, GUSB, PAICS	179	187	20240	4.83733	0.845489	0.109778	0.10874
GO:0051301	cell division	11	5.91398	0.00288733	HELLS, STAG2, LIG1, HAUS8, CDK4, NSMCE2, NCAPG2, RPS3, CLTA, BUB3, SMC2	179	399	20240	3.11729	0.981236	0.214458	0.212431
GO:0006306	DNA methylation	4	2.15054	0.00300562	HELLS, DNMT1, CTCF, EZH2	179	33	20240	13.7058	0.98406	0.214458	0.212431
GO:0006284	base-excision repair	4	2.15054	0.00327537	POLB, FEN1, LIG1, PARP1	179	34	20240	13.3027	0.989013	0.214458	0.212431
GO:0010332	response to gamma radiation	4	2.15054	0.00327537	POLB, GPX1, PARP1, BRCA2	179	34	20240	13.3027	0.989013	0.214458	0.212431
GO:0045672	positive regulation of osteoclast differentiation	4	2.15054	0.00385822	CCL5, TREM2, FOS, ITGA9	179	36	20240	12.5636	0.995084	0.234739	0.232519
GO:0051603	proteolysis involved in cellular protein catabolic process	5	2.68817	0.00392654	PSMB6, PSMA6, PSMB2, CTSZ, PSMB8	179	73	20240	7.7447	0.995527	0.234739	0.232519
GO:0050766	positive regulation of phagocytosis	5	2.68817	0.00412288	FCGR1, PYCARD, PROS1, SIRPA, TREM2	179	74	20240	7.64004	0.996589	0.236207	0.233974
GO:0010498	proteasomal protein catabolic process	4	2.15054	0.00520358	PSMB6, PSMA6, PSMB2, PSMB8	179	40	20240	11.3073	0.999233	0.275189	0.272587
GO:0031297	replication fork processing	4	2.15054	0.00520358	ETAA1, PCNA, BRCA2, ASF1A	179	40	20240	11.3073	0.999233	0.275189	0.272587
GO:0030174	regulation of DNA-dependent DNA replication initiation	3	1.6129	0.00562869	GMNN, MCM3, MCM6	179	13	20240	26.0937	0.999574	0.286646	0.283936
GO:0031663	lipopolysaccharide-mediated signaling pathway	4	2.15054	0.00596928	CCL5, LY86, TREM2, CD14	179	42	20240	10.7688	0.999734	0.293134	0.290363
GO:0002376	immune system process	12	6.45161	0.00996116	FCGR1, C1QB, PYCARD, MARCO, PARP1, CD81, G3BP2, LY86, SIRPA, CD14, IFI30, PSMB8	179	553	20240	2.45366	0.999999	0.472296	0.467831
GO:0006338	chromatin remodeling	7	3.76344	0.0112898	ACTR6, ACTL6A, DEK, NR3C1, ACTB, EZH2, GATAD2A	179	212	20240	3.73353	1	0.51745	0.512558
GO:0007059	chromosome segregation	5	2.68817	0.011789	TOP2A, STAG2, RPS3, CTCF, BUB3	179	100	20240	5.65363	1	0.522898	0.517954
GO:0007264	small GTPase mediated signal transduction	5	2.68817	0.0148026	RUFY1, RAP1B, GDI2, G3BP2, RAC2	179	107	20240	5.28377	1	0.636049	0.630036
GO:1903376	regulation of oxidative stress-induced neuron intrinsic apoptotic signaling pathway	2	1.07527	0.017512	PARP1, TREM2	179	2	20240	113.073	1	0.708207	0.701511
GO:0002588	positive regulation of antigen processing and presentation of peptide antigen via MHC class II	2	1.07527	0.017512	PYCARD, TREM2	179	2	20240	113.073	1	0.708207	0.701511
GO:0042776	mitochondrial ATP synthesis coupled proton transport	4	2.15054	0.0180615	NDUFA8, NDUFB11, NDUFC2, SDHD	179	63	20240	7.17921	1	0.709559	0.70285
GO:0006335	DNA replication-dependent nucleosome assembly	3	1.6129	0.0202061	CHAF1A, NASP, ASF1A	179	25	20240	13.5687	1	0.771761	0.764464
GO:0071897	DNA biosynthetic process	3	1.6129	0.0233723	POLB, POLA1, LIG1	179	27	20240	12.5636	1	0.836298	0.828392
GO:2000779	regulation of double-strand break repair	3	1.6129	0.0250268	ACTL6A, DEK, ACTB	179	28	20240	12.1149	1	0.836298	0.828392
GO:0030261	chromosome condensation	3	1.6129	0.0250268	TOP2A, NCAPG2, SMC2	179	28	20240	12.1149	1	0.836298	0.828392
GO:0006898	receptor-mediated endocytosis	4	2.15054	0.0256231	FCGR1, MARCO, SNX17, CD14	179	72	20240	6.28181	1	0.836298	0.828392
GO:0071707	immunoglobulin heavy chain V-D-J recombination	2	1.07527	0.0261533	POLB, EZH2	179	3	20240	75.3818	1	0.836298	0.828392
GO:0006613	cotranslational protein targeting to membrane	2	1.07527	0.0261533	TRAM1, ARL6IP1	179	3	20240	75.3818	1	0.836298	0.828392
GO:0006273	lagging strand elongation	2	1.07527	0.0261533	POLA1, LIG1	179	3	20240	75.3818	1	0.836298	0.828392
GO:0070301	cellular response to hydrogen peroxide	4	2.15054	0.0275006	PCNA, RPS3, SIRPA, EZH2	179	74	20240	6.11203	1	0.859395	0.85127
GO:0010971	positive regulation of G2/M transition of mitotic cell cycle	3	1.6129	0.0284739	RRM1, CDK4, DTL	179	30	20240	11.3073	1	0.870036	0.86181
GO:1901224	positive regulation of NIK/NF-kappaB signaling	4	2.15054	0.0294497	PYCARD, RPS3, TREM2, CD14	179	76	20240	5.95119	1	0.880291	0.871968
GO:0042771	intrinsic apoptotic signaling pathway in response to DNA damage by p53 class mediator	3	1.6129	0.0339759	PYCARD, ATAD5, BRCA2	179	33	20240	10.2793	1	0.931231	0.922427
GO:0006272	leading strand elongation	2	1.07527	0.0347191	POLA1, PCNA	179	4	20240	56.5363	1	0.931231	0.922427
GO:1905897	regulation of response to endoplasmic reticulum stress	2	1.07527	0.0347191	MBTPS2, MANF	179	4	20240	56.5363	1	0.931231	0.922427
GO:1905521	regulation of macrophage migration	2	1.07527	0.0347191	CD81, CD9	179	4	20240	56.5363	1	0.931231	0.922427
GO:1904874	positive regulation of telomerase RNA localization to Cajal body	2	1.07527	0.0347191	CCT2, TCP1	179	4	20240	56.5363	1	0.931231	0.922427
GO:0071347	cellular response to interleukin-1	4	2.15054	0.0357233	PYCARD, CCL5, SAA3, SIRPA	179	82	20240	5.51574	1	0.931231	0.922427
GO:0006303	double-strand break repair via nonhomologous end joining	3	1.6129	0.0358947	POLB, POLA1, LIG1	179	34	20240	9.977	1	0.931231	0.922427
GO:0042127	regulation of cell proliferation	6	3.22581	0.0390073	DNMT1, CDK4, CD81, CDCA7, NR3C1, EZH2	179	211	20240	3.21534	1	0.993242	0.983851
GO:1902975	mitotic DNA replication initiation	2	1.07527	0.0432099	POLA1, MCM3	179	5	20240	45.2291	1	1	0.991266
GO:0090666	scaRNA localization to Cajal body	2	1.07527	0.0432099	CCT2, TCP1	179	5	20240	45.2291	1	1	0.991266
GO:0006269	DNA replication, synthesis of RNA primer	2	1.07527	0.0432099	POLA1, PRIM1	179	5	20240	45.2291	1	1	0.991266
GO:0006310	DNA recombination	4	2.15054	0.0463131	LIG1, NSMCE2, ACTL6A, BRCA2	179	91	20240	4.97023	1	1	0.991266
GO:1905168	positive regulation of double-strand break repair via homologous recombination	3	1.6129	0.0482372	PARP1, ACTL6A, ACTB	179	40	20240	8.48045	1	1	0.991266
GO:0009617	response to bacterium	7	3.76344	0.0487802	FCGR1, SNX3, PYCARD, KLHL6, SAA3, LPL, CD14	179	299	20240	2.64719	1	1	0.991266
GO:0002181	cytoplasmic translation	4	2.15054	0.0501504	RPS5, RPLP0, RPS3, RPL8	179	94	20240	4.8116	1	1	0.991266
GO:0006412	translation	7	3.76344	0.0511213	EIF3L, MRPL18, RPS5, RPS3, EIF3F, RPL8, GSPT1	179	302	20240	2.62089	1	1	0.991266
GO:0006271	DNA strand elongation involved in DNA replication	2	1.07527	0.0516264	POLA1, MCM3	179	6	20240	37.6909	1	1	0.991266
GO:1904628	cellular response to phorbol 13-acetate 12-myristate	2	1.07527	0.0516264	CDK4, RPLP0	179	6	20240	37.6909	1	1	0.991266
GO:0060547	negative regulation of necrotic cell death	2	1.07527	0.0516264	FTH1, NDUFC2	179	6	20240	37.6909	1	1	0.991266
GO:0030207	chondroitin sulfate catabolic process	2	1.07527	0.0516264	HEXB, GUSB	179	6	20240	37.6909	1	1	0.991266
GO:0014905	myoblast fusion involved in skeletal muscle regeneration	2	1.07527	0.0516264	CD81, CD9	179	6	20240	37.6909	1	1	0.991266
GO:0006266	DNA ligation	2	1.07527	0.0516264	TOP2A, LIG1	179	6	20240	37.6909	1	1	0.991266
GO:0006287	base-excision repair, gap-filling	2	1.07527	0.0516264	POLB, PCNA	179	6	20240	37.6909	1	1	0.991266
GO:0043967	histone H4 acetylation	3	1.6129	0.0526476	ACTL6A, BRCA2, ACTB	179	42	20240	8.07662	1	1	0.991266
GO:0045444	fat cell differentiation	4	2.15054	0.0582726	GPX1, SDF4, TBL1X, PSMB8	179	100	20240	4.52291	1	1	0.991266
GO:0006275	regulation of DNA replication	3	1.6129	0.0595191	PCNA, GMNN, ACTL6A	179	45	20240	7.53818	1	1	0.991266
GO:0009410	response to xenobiotic stimulus	7	3.76344	0.0617166	DNMT1, GPX1, UBE2B, OXCT1, CDK4, LPL, FOS	179	317	20240	2.49687	1	1	0.991266
GO:0019216	regulation of lipid metabolic process	3	1.6129	0.0618748	GOLM1, TREM2, ZMPSTE24	179	46	20240	7.3743	1	1	0.991266
GO:0051604	protein maturation	3	1.6129	0.0618748	TSPAN14, MBTPS2, ZMPSTE24	179	46	20240	7.3743	1	1	0.991266
GO:0045815	positive regulation of gene expression, epigenetic	3	1.6129	0.0666796	LCOR, ASH2L, NR3C1	179	48	20240	7.06704	1	1	0.991266
GO:0072659	protein localization to plasma membrane	5	2.68817	0.0689711	IFT20, TSPAN14, PGAP2, CD81, ATP1B3	179	175	20240	3.23065	1	1	0.991266
GO:0034614	cellular response to reactive oxygen species	3	1.6129	0.0741093	PRDX3, RPS3, FOS	179	51	20240	6.65133	1	1	0.991266
GO:0006334	nucleosome assembly	4	2.15054	0.0762313	CHAF1A, NASP, DNAJC9, ASF1A	179	112	20240	4.03831	1	1	0.991266
GO:0051276	chromosome organization	3	1.6129	0.0766425	BRCA2, SMC2, ZMPSTE24	179	52	20240	6.52342	1	1	0.991266
GO:0045739	positive regulation of DNA repair	3	1.6129	0.0766425	PCNA, ACTL6A, RPS3	179	52	20240	6.52342	1	1	0.991266
GO:0031666	positive regulation of lipopolysaccharide-mediated signaling pathway	2	1.07527	0.0845627	LY86, CD14	179	10	20240	22.6145	1	1	0.991266
GO:0071223	cellular response to lipoteichoic acid	2	1.07527	0.0845627	TREM2, CD14	179	10	20240	22.6145	1	1	0.991266
GO:0090305	nucleic acid phosphodiester bond hydrolysis	2	1.07527	0.0845627	FEN1, ATAD5	179	10	20240	22.6145	1	1	0.991266
GO:0009650	UV protection	2	1.07527	0.0845627	GPX1, SDF4	179	10	20240	22.6145	1	1	0.991266
GO:0042542	response to hydrogen peroxide	3	1.6129	0.0870401	PRDX3, GPX1, LIG1	179	56	20240	6.05746	1	1	0.991266
GO:1905820	positive regulation of chromosome separation	2	1.07527	0.0926175	NCAPG2, SMC2	179	11	20240	20.5587	1	1	0.991266
GO:0002862	negative regulation of inflammatory response to antigenic stimulus	2	1.07527	0.0926175	GPX1, TREM2	179	11	20240	20.5587	1	1	0.991266
GO:0019372	lipoxygenase pathway	2	1.07527	0.0926175	GPX1, ALOX5AP	179	11	20240	20.5587	1	1	0.991266
GO:0000722	telomere maintenance via recombination	2	1.07527	0.0926175	NSMCE2, BRCA2	179	11	20240	20.5587	1	1	0.991266
GO:0042590	antigen processing and presentation of exogenous peptide antigen via MHC class I	2	1.07527	0.0926175	FCGR1, IFI30	179	11	20240	20.5587	1	1	0.991266
GO:0045471	response to ethanol	4	2.15054	0.0945619	POLB, OXCT1, SDF4, CD14	179	123	20240	3.67716	1	1	0.991266
GO:0008630	intrinsic apoptotic signaling pathway in response to DNA damage	3	1.6129	0.0978305	POLB, ATAD5, BRCA2	179	60	20240	5.65363	1	1	0.991266

## Sheet: Cluster 5 Up BP
Term	Count	%	PValue	Genes	List Total	Pop Hits	Pop Total	Fold Enrichment	Bonferroni	Benjamini	FDR
GO:0051607~defense response to virus	39	18.0556	9.69695e-35	IFITM3, RTP4, SLFN8, OAS1A, ADAR, DDX60, IFIT1, SAMHD1, SLFN9, IFIT3, IFIT2, PYCARD, IFIH1, OASL1, OASL2, GBP3, ZBP1, GBP5, GBP7, RSAD2, IFI204, DTX3L, STAT1, MX2, STAT2, MX1, EIF2AK2, ISG15, PARP9, PML, ISG20, BST2, CXCL10, AIM2, IRF7, TLR3, TRIM12A, TRIM34A, TRIM56	200	243	20240	16.242	1.2703e-31	1.2703e-31	1.20436e-31
GO:0002376~immune system process	49	22.6852	9.19128e-32	IFITM3, H2-T23, CSF1, ADAR, IFIT1, IFIT3, IFIT2, PYCARD, IFIH1, CASP4, MAP3K8, LGALS9, B2M, OASL1, OASL2, HERC6, ZBP1, GBP5, MORC3, GBP7, DTX3L, RSAD2, SP110, CD180, PARP9, MPEG1, FCGR1, AIM2, IRF7, TLR3, H2-D1, TRIM56, CD274, SLFN8, SLFN2, SAMHD1, RNF213, GBP2, IFI204, EIF2AK2, IRGM1, NMI, PARP14, PSMB8, IIGP1, PML, BST2, ISG20, THEMIS2	200	553	20240	8.96709	1.20406e-28	6.02029e-29	5.70778e-29
GO:0045087~innate immune response	50	23.1481	2.46955e-27	IFITM3, IGHM, TRIM30B, TRIM30A, CSF1, TRIM30D, TRIM30C, ADAR, IFIT1, IFIT3, IFIT2, PYCARD, IFIH1, C4B, CASP4, B2M, OASL1, OASL2, HERC6, ZBP1, TGTP2, MORC3, DTX3L, RSAD2, SP110, CD180, PARP9, MPEG1, FCGR1, AIM2, IGTP, IRF7, TLR3, TRIM34A, TRIM56, SAMHD1, IFI204, MX2, MX1, EIF2AK2, IRGM1, ISG15, NMI, PARP14, IIGP1, PML, BST2, ISG20, REL, TRIM12A	200	729	20240	6.94102	3.23511e-24	1.07837e-24	1.0224e-24
GO:0035458~cellular response to interferon-beta	19	8.7963	4.88445e-21	TGTP2, GBP7, PNPT1, IFI204, IFI205, STAT1, IRGM1, OAS1A, IFIT1, IFIT3, IIGP1, F830016B08RIK, AIM2, IGTP, GBP2, CALM1, TLR3, 9930111J21RIK2, GBP3	200	70	20240	27.4686	6.39864e-18	1.59966e-18	1.51662e-18
GO:0009615~response to virus	20	9.25926	1.57568e-19	IFITM3, RSAD2, MX2, MX1, EIF2AK2, OAS1A, ADAR, ISG15, NMI, DDX60, IFIT1, IFIT3, IFIT2, IFIH1, ISG20, BST2, NPC2, OASL1, TLR3, OASL2	200	99	20240	20.4444	2.06414e-16	4.12829e-17	3.914e-17
GO:0002218~activation of innate immune response	14	6.48148	1.8087e-15	ZBP1, GBP5, TRIM30B, TRIM30A, GBP7, TRIM30D, IFI204, IFI205, TRIM30C, PYCARD, AIM2, GBP2, TRIM12A, GBP3	200	51	20240	27.7804	2.32703e-12	3.38485e-13	3.20915e-13
GO:0045071~negative regulation of viral genome replication	14	6.48148	1.8087e-15	IFITM3, RSAD2, IFI204, MX2, EIF2AK2, OAS1A, ISG15, IFIH1, ISG20, PARP10, BST2, BANF1, OASL1, OASL2	200	51	20240	27.7804	2.32703e-12	3.38485e-13	3.20915e-13
GO:0071346~cellular response to interferon-gamma	17	7.87037	2.65411e-14	GBP5, ACTR2, CCL12, DAXX, GBP7, STAT1, GBP9, IRGM1, CCL7, CCL4, IGTP, CCL2, EVL, GBP2, CALM1, TLR3, GBP3	200	115	20240	14.96	3.476e-11	4.34611e-12	4.12051e-12
GO:0009617~response to bacterium	21	9.72222	1.74697e-11	GBP5, CD52, TRIM30A, SLFN2, IFI204, IFI205, SP110, STAT1, MX2, IRGM1, ISG15, IFIT1, USP18, IFIT3, IIGP1, PYCARD, FCGR1, CXCL10, CCL2, GBP2, HERC6	200	299	20240	7.10769	2.28853e-08	2.54281e-09	2.41082e-09
GO:0044790~negative regulation by host of viral release from host cell	7	3.24074	9.72891e-08	TRIM30B, TRIM30A, TRIM30D, TRIM30C, PML, TRIM56, TRIM12A	200	24	20240	29.5167	0.000127441	1.27449e-05	1.20833e-05
GO:0032480~negative regulation of type I interferon production	7	3.24074	2.63542e-07	GBP7, IGTP, IRGM1, BANF1, NMI, XAF1, GBP3	200	28	20240	25.3	0.00034518	3.13854e-05	2.97562e-05
GO:0051715~cytolysis in other organism	5	2.31481	3.1011e-07	GBP5, GBP7, IGTP, GBP2, GBP3	200	7	20240	72.2857	0.000406161	3.38536e-05	3.20964e-05
GO:0051092~positive regulation of NF-kappaB transcription factor activity	12	5.55556	6.56393e-07	PYCARD, TRIM30B, TRIM30A, AIM2, TRIM30D, TRIM30C, IL18, EIF2AK2, PPIA, TLR3, TRIM12A, TRIM34A	200	163	20240	7.45031	0.000859506	6.61443e-05	6.27108e-05
GO:0046597~negative regulation of viral entry into host cell	7	3.24074	1.07225e-06	IFITM3, TRIM30B, TRIM30A, TRIM30D, TRIM30C, TRIM56, TRIM12A	200	35	20240	20.24	0.00140366	0.000100332	9.51236e-05
GO:0032760~positive regulation of tumor necrosis factor production	11	5.09259	1.54778e-06	IFIH1, PYCARD, H2-T23, H2-T22, CCL4, IL18, CCL2, OAS1A, LGALS9, H2-D1, TLR3	200	143	20240	7.78462	0.00202554	0.000135173	0.000128156
GO:0071222~cellular response to lipopolysaccharide	15	6.94444	2.16817e-06	GBP5, CD274, STAT1, CD180, IRGM1, CXCL16, PYCARD, CXCL10, IGTP, TSPO, CCL2, CMPK2, GBP2, B2M, GBP3	200	306	20240	4.96078	0.00283627	0.000177519	0.000168304
GO:0046596~regulation of viral entry into host cell	6	2.77778	2.54568e-06	TRIM30B, TRIM30A, TRIM30D, TRIM30C, TRIM12A, TRIM34A	200	23	20240	26.4	0.00332929	0.000196167	0.000185985
GO:0034340~response to type I interferon	5	2.31481	2.83488e-06	SP100, STAT1, MX2, ISG15, TRIM56	200	11	20240	46	0.00370681	0.000206316	0.000195607
GO:0006954~inflammatory response	17	7.87037	3.19044e-06	GBP5, CCL12, VCAM1, CSF1, CD180, IL18, PYCARD, C4B, CXCL10, AIM2, THEMIS2, CCL7, CASP4, CCL4, REL, CCL2, TLR3	200	410	20240	4.1961	0.00417076	0.000219972	0.000208554
GO:0010508~positive regulation of autophagy	9	4.16667	4.09782e-06	TRIM30B, TRIM30A, TRIM30D, TRIM30C, IGTP, IRGM1, AMBRA1, TRIM12A, TRIM34A	200	94	20240	9.68936	0.00535378	0.000257978	0.000244587
GO:0031664~regulation of lipopolysaccharide-mediated signaling pathway	5	2.31481	4.2196e-06	TRIM30B, TRIM30A, TRIM30D, TRIM30C, TRIM12A	200	12	20240	42.1667	0.00551244	0.000257978	0.000244587
GO:0042832~defense response to protozoan	7	3.24074	4.33245e-06	TGTP2, GBP7, GBP9, IGTP, GBP2, IIGP1, GBP3	200	44	20240	16.1	0.00565945	0.000257978	0.000244587
GO:0060339~negative regulation of type I interferon-mediated signaling pathway	6	2.77778	4.85862e-06	STAT2, OAS1A, ADAR, ISG15, SAMHD1, USP18	200	26	20240	23.3538	0.0063446	0.00027673	0.000262366
GO:0050830~defense response to Gram-positive bacterium	12	5.55556	8.08039e-06	PYCARD, H2-T23, H2-T22, GBP7, GBP9, CASP4, IL18, GBP2, B2M, MPEG1, H2-D1, GBP3	200	211	20240	5.75545	0.0105295	0.000428589	0.000406342
GO:0006952~defense response	10	4.62963	8.17919e-06	CXCL10, TGTP2, F830016B08RIK, STAT1, STAT2, IGTP, IRGM1, TLR3, IIGP1, 9930111J21RIK2	200	136	20240	7.44118	0.0106576	0.000428589	0.000406342
GO:0060337~type I interferon signaling pathway	6	2.77778	1.65772e-05	IFIH1, IFITM3, STAT1, STAT2, IRF7, OAS1A	200	33	20240	18.4	0.0214822	0.000804299	0.000762549
GO:0002230~positive regulation of defense response to virus by host	6	2.77778	1.65772e-05	PYCARD, AIM2, DTX3L, STAT1, PARP9, PML	200	33	20240	18.4	0.0214822	0.000804299	0.000762549
GO:0070534~protein K63-linked ubiquitination	7	3.24074	3.57143e-05	TRIM30B, TRIM30A, RNF213, TRIM30D, TRIM30C, TRIM56, TRIM12A	200	63	20240	11.2444	0.0457089	0.00167092	0.00158418
GO:0035457~cellular response to interferon-alpha	5	2.31481	6.93462e-05	IFI204, OAS1A, IFIT1, IFIT3, IFIT2	200	23	20240	22	0.0868423	0.00313253	0.00296993
GO:0044406~adhesion of symbiont to host	4	1.85185	0.000106774	GBP7, GBP9, GBP2, GBP3	200	10	20240	40.48	0.130539	0.00466246	0.00442044
GO:0098586~cellular response to virus	6	2.77778	0.000170931	CXCL10, IGTP, IRGM1, ADAR, LGALS9, TLR3	200	53	20240	11.4566	0.200636	0.00688668	0.0065292
GO:0032728~positive regulation of interferon-beta production	6	2.77778	0.000170931	IFIH1, IRF7, OAS1A, ISG15, TLR3, TRIM56	200	53	20240	11.4566	0.200636	0.00688668	0.0065292
GO:0043123~positive regulation of I-kappaB kinase/NF-kappaB signaling	9	4.16667	0.000173481	TRIM30B, TRIM30A, TRIM30D, TRIM30C, REL, TNFSF10, TLR3, TRIM12A, TRIM34A	200	158	20240	5.76456	0.203302	0.00688668	0.0065292
GO:0006955~immune response	16	7.40741	0.000221538	H2-T23, CD274, USP25, CCL12, H2-T22, CD180, IL18, IFIH1, CXCL10, CCL7, CCL4, TNFSF10, CCL2, B2M, TLR3, H2-D1	200	524	20240	3.09008	0.251921	0.00853573	0.00809266
GO:0048247~lymphocyte chemotaxis	5	2.31481	0.000231713	CCL12, CCL7, CCL4, CCL2, CXCL16	200	31	20240	16.3226	0.261828	0.00867267	0.00822249
GO:0035455~response to interferon-alpha	4	1.85185	0.000248992	IFITM3, BST2, EIF2AK2, ADAR	200	13	20240	31.1385	0.278354	0.00906055	0.00859023
GO:0034341~response to interferon-gamma	5	2.31481	0.000296749	IFITM3, BST2, SP100, STAT1, CXCL16	200	33	20240	15.3333	0.32213	0.0105065	0.00996115
GO:0035456~response to interferon-beta	4	1.85185	0.000314608	IFITM3, BST2, STAT1, XAF1	200	14	20240	28.9143	0.337809	0.0108457	0.0102827
GO:0050729~positive regulation of inflammatory response	7	3.24074	0.000439642	PYCARD, ZBP1, AIM2, CASP4, IL18, NMI, TLR3	200	99	20240	7.15556	0.43789	0.0146492	0.0138888
GO:0032731~positive regulation of interleukin-1 beta production	6	2.77778	0.000447304	PYCARD, GBP5, AIM2, IFI204, IFI205, CASP4	200	65	20240	9.34154	0.443506	0.0146492	0.0138888
GO:0032688~negative regulation of interferon-beta production	4	1.85185	0.000477042	PYCARD, MORC3, REL, NMI	200	16	20240	25.3	0.464778	0.0152421	0.0144509
GO:0042632~cholesterol homeostasis	7	3.24074	0.00051564	EHD1, LIMA1, SOAT1, NPC2, IL18, TSPO, LDLRAP1	200	102	20240	6.9451	0.491181	0.0160831	0.0152482
GO:0043065~positive regulation of apoptotic process	13	6.01852	0.000653686	ZBP1, DAXX, SP110, IL18, EIF2AK2, IFIT2, PYCARD, TNFSF10, TSPO, SUDS3, CALM1, BCL2A1B, TLR3	200	402	20240	3.27264	0.575401	0.0199146	0.0188809
GO:0031663~lipopolysaccharide-mediated signaling pathway	5	2.31481	0.000757609	CCL12, STAT1, CD180, IL18, CCL2	200	42	20240	12.0476	0.629478	0.0225561	0.0213852
GO:0042742~defense response to bacterium	13	6.01852	0.000813194	GBP5, IGHM, GBP7, IRGM1, OAS1A, ISG15, MPEG1, FCGR1, RNF213, CASP4, IGTP, GBP2, GBP3	200	412	20240	3.1932	0.65552	0.023673	0.0224442
GO:1901224~positive regulation of NIK/NF-kappaB signaling	6	2.77778	0.000917049	PYCARD, IL18, EIF2AK2, NMI, TLR3, TRIM56	200	76	20240	7.98947	0.699373	0.026116	0.0247603
GO:0070106~interleukin-27-mediated signaling pathway	3	1.38889	0.000943285	STAT1, OASL1, OASL2	200	5	20240	60.72	0.709539	0.0262916	0.0249268
GO:0006914~autophagy	9	4.16667	0.000980358	TRIM30B, TRIM30A, TRIM30D, TRIM30C, IRGM1, NRBF2, AMBRA1, FNBP1L, TRIM12A	200	205	20240	4.44293	0.723321	0.0267556	0.0253668
GO:0006325~chromatin organization	12	5.55556	0.00105107	PARP10, DAXX, DTX3L, USP21, EYA4, HLTF, BANF1, YEATS4, SUDS3, CHD3, DEK, IKZF1	200	367	20240	3.30899	0.747822	0.0280999	0.0266413
GO:0034097~response to cytokine	6	2.77778	0.00129167	CD274, SP100, STAT1, REL, PML, CXCL16	200	82	20240	7.40488	0.816067	0.0331783	0.031456
GO:0030593~neutrophil chemotaxis	6	2.77778	0.00129167	CXCL10, CCL12, CCL7, CCL4, CCL2, PPIA	200	82	20240	7.40488	0.816067	0.0331783	0.031456
GO:0051091~positive regulation of sequence-specific DNA binding transcription factor activity	7	3.24074	0.00175134	PYCARD, TRIM30B, SP100, TRIM30A, TRIM30D, TRIM30C, TRIM12A	200	129	20240	5.49147	0.899366	0.0441203	0.0418301
GO:0032722~positive regulation of chemokine production	5	2.31481	0.00195308	PYCARD, IL18, EIF2AK2, LGALS9, TLR3	200	54	20240	9.37037	0.922775	0.0482742	0.0457683
GO:0048245~eosinophil chemotaxis	4	1.85185	0.00206032	CCL12, CCL7, CCL4, CCL2	200	26	20240	15.5692	0.932915	0.0499817	0.0473872
GO:0050829~defense response to Gram-negative bacterium	7	3.24074	0.00212278	PYCARD, IGHM, IGTP, IRGM1, B2M, MPEG1, IIGP1	200	134	20240	5.28657	0.938197	0.0505607	0.0479362
GO:0070098~chemokine-mediated signaling pathway	5	2.31481	0.00223396	CXCL10, CCL12, CCL7, CCL4, CCL2	200	56	20240	9.03571	0.946591	0.0522588	0.0495461
GO:0006935~chemotaxis	7	3.24074	0.00228692	CXCL10, CCL12, CCL7, CCL4, CCL2, LGALS9, CXCL16	200	136	20240	5.20882	0.950178	0.052559	0.0498308
GO:0032727~positive regulation of interferon-alpha production	4	1.85185	0.00255882	IFIH1, STAT1, IRF7, TLR3	200	28	20240	14.4571	0.965138	0.0575128	0.0545274
GO:0060335~positive regulation of interferon-gamma-mediated signaling pathway	3	1.38889	0.00259027	IGTP, IRGM1, PARP9	200	8	20240	37.95	0.966548	0.0575128	0.0545274
GO:0045070~positive regulation of viral genome replication	4	1.85185	0.00283358	GBP7, ADAR, PPIA, GBP3	200	29	20240	13.9586	0.975699	0.0618665	0.0586551
GO:0035307~positive regulation of protein dephosphorylation	4	1.85185	0.00312582	ANKLE2, AMBRA1, CALM1, PPIA	200	30	20240	13.4933	0.983448	0.0671283	0.0636438
GO:0070212~protein poly-ADP-ribosylation	3	1.38889	0.00330884	PARP10, PARP9, PARP14	200	9	20240	33.7333	0.986986	0.0699125	0.0662834
GO:0071356~cellular response to tumor necrosis factor	7	3.24074	0.00359732	PYCARD, CCL12, VCAM1, CCL7, CCL4, CCL2, GBP3	200	149	20240	4.75436	0.991094	0.0738698	0.0700354
GO:0043410~positive regulation of MAPK cascade	8	3.7037	0.00360891	IGHM, TRIM30B, TRIM30A, TRIM30D, TRIM30C, EIF2AK2, PPIA, TRIM12A	200	199	20240	4.06834	0.991228	0.0738698	0.0700354
GO:1901526~positive regulation of macromitophagy	3	1.38889	0.00410935	IGTP, IRGM1, AMBRA1	200	10	20240	30.36	0.995458	0.0828192	0.0785202
GO:0016567~protein ubiquitination	12	5.55556	0.00446916	TRIM30B, TRIM30A, RNF213, DTX3L, TRIM30D, OS9, ANAPC16, TRIM30C, ASB13, HERC6, TRIM12A, TRIM34A	200	442	20240	2.74751	0.997171	0.088706	0.0841014
GO:0000165~MAPK cascade	6	2.77778	0.00520666	IGHM, CCL12, TAOK3, IL18, CCL2, TLR3	200	113	20240	5.37345	0.998928	0.101802	0.0965176
GO:0006898~receptor-mediated endocytosis	5	2.31481	0.00554095	FCGR1, IFITM3, DNAJC13, LDLRAP1, CXCL16	200	72	20240	7.02778	0.99931	0.104958	0.0995101
GO:0032880~regulation of protein localization	6	2.77778	0.00560449	TRIM30B, TRIM30A, TRIM30D, TRIM30C, TRIM12A, TRIM34A	200	115	20240	5.28	0.999365	0.104958	0.0995101
GO:0002548~monocyte chemotaxis	4	1.85185	0.00568858	CCL12, CCL7, CCL4, CCL2	200	37	20240	10.9405	0.999432	0.104958	0.0995101
GO:0045824~negative regulation of innate immune response	4	1.85185	0.00568858	IFI204, TRAFD1, BANF1, NMI	200	37	20240	10.9405	0.999432	0.104958	0.0995101
GO:0002474~antigen processing and presentation of peptide antigen via MHC class I	3	1.38889	0.0059496	H2-T23, B2M, H2-D1	200	12	20240	25.3	0.999597	0.10825	0.102631
GO:0032819~positive regulation of natural killer cell proliferation	4	1.85185	0.00613202	H2-T23, H2-T22, IL18, H2-D1	200	38	20240	10.6526	0.999683	0.11004	0.104328
GO:0045893~positive regulation of transcription, DNA-templated	16	7.40741	0.00627404	SF3B5, SP100, DTX3L, STAT1, USP21, RHOG, YEATS4, CHD3, IKZF1, PARP9, PML, ELF1, IRF7, REL, NRBF2, TRIM56	200	736	20240	2.2	0.999737	0.111067	0.105302
GO:0050778~positive regulation of immune response	4	1.85185	0.00659555	C4B, IGHM, RSAD2, B2M	200	39	20240	10.3795	0.999828	0.115202	0.109222
GO:0060700~regulation of ribonuclease activity	3	1.38889	0.00698607	OAS1A, OASL1, OASL2	200	13	20240	23.3538	0.999897	0.120159	0.113922
GO:0006511~ubiquitin-dependent protein catabolic process	9	4.16667	0.0070628	USP25, PSMA3, RNF213, DTX3L, OS9, USP21, RNF130, USP18, HERC6	200	283	20240	3.21837	0.999907	0.120159	0.113922
GO:0045089~positive regulation of innate immune response	4	1.85185	0.00758376	GBP5, LGALS9, NMI, TRIM56	200	41	20240	9.87317	0.999953	0.125756	0.119228
GO:0032736~positive regulation of interleukin-13 production	4	1.85185	0.00758376	H2-T23, H2-T22, IL18, H2-D1	200	41	20240	9.87317	0.999953	0.125756	0.119228
GO:0071347~cellular response to interleukin-1	5	2.31481	0.0087337	PYCARD, CCL12, CCL7, CCL4, CCL2	200	82	20240	6.17073	0.99999	0.143014	0.135591
GO:0032733~positive regulation of interleukin-10 production	4	1.85185	0.00922191	PYCARD, CD274, ISG15, LGALS9	200	44	20240	9.2	0.999995	0.146527	0.138921
GO:0070269~pyroptosis	4	1.85185	0.00922191	PYCARD, ZBP1, AIM2, CASP4	200	44	20240	9.2	0.999995	0.146527	0.138921
GO:1900226~negative regulation of NLRP3 inflammasome complex assembly	3	1.38889	0.00928376	TRIM30A, IGTP, IRGM1	200	15	20240	20.24	0.999995	0.146527	0.138921
GO:0006605~protein targeting	4	1.85185	0.00981022	GBP5, OS9, GBP2, PML	200	45	20240	8.99556	0.999998	0.152993	0.145051
GO:0071466~cellular response to xenobiotic stimulus	5	2.31481	0.0102883	AIM2, CCL4, CCL2, CD69, TLR3	200	86	20240	5.88372	0.999999	0.15856	0.15033
GO:0071345~cellular response to cytokine stimulus	4	1.85185	0.0104199	GBP5, STAT1, LDLRAP1, GBP2	200	46	20240	8.8	0.999999	0.158722	0.150483
GO:0032611~interleukin-1 beta production	3	1.38889	0.0105419	PYCARD, AIM2, CASP4	200	16	20240	18.975	0.999999	0.158734	0.150494
GO:0050687~negative regulation of defense response to virus	3	1.38889	0.0118708	FGL2, IGTP, IRGM1	200	17	20240	17.8588	1	0.175862	0.166733
GO:0000209~protein polyubiquitination	7	3.24074	0.0119479	TRIM30B, TRIM30A, TRIM30D, TRIM30C, AMBRA1, TRIM12A, TRIM34A	200	192	20240	3.68958	1	0.175862	0.166733
GO:0034138~toll-like receptor 3 signaling pathway	3	1.38889	0.013269	OAS1A, LGALS9, TLR3	200	18	20240	16.8667	1	0.193137	0.183112
GO:0043124~negative regulation of I-kappaB kinase/NF-kappaB signaling	4	1.85185	0.0160819	PYCARD, STAT1, IGTP, IRGM1	200	54	20240	7.4963	1	0.231509	0.219492
GO:0050727~regulation of inflammatory response	5	2.31481	0.0170979	PYCARD, ZBP1, CASP4, PIK3AP1, USP18	200	100	20240	5.06	1	0.243459	0.230822
GO:0006471~protein ADP-ribosylation	3	1.38889	0.0178647	PARP10, PARP9, PARP14	200	21	20240	14.4571	1	0.246345	0.233558
GO:0001913~T cell mediated cytotoxicity	3	1.38889	0.0178647	H2-T23, B2M, H2-D1	200	21	20240	14.4571	1	0.246345	0.233558
GO:0060340~positive regulation of type I interferon-mediated signaling pathway	3	1.38889	0.0178647	ZBP1, IRF7, TRIM56	200	21	20240	14.4571	1	0.246345	0.233558
GO:2000406~positive regulation of T cell migration	3	1.38889	0.0195256	PYCARD, CXCL10, LGALS9	200	22	20240	13.8	1	0.264267	0.250549
GO:0034345~negative regulation of type III interferon production	2	0.925926	0.0195678	GBP7, GBP3	200	2	20240	101.2	1	0.264267	0.250549
GO:0051289~protein homotetramerization	4	1.85185	0.0203417	GBP5, EVL, SAMHD1, B2M	200	59	20240	6.86102	1	0.271914	0.257799
GO:0019221~cytokine-mediated signaling pathway	6	2.77778	0.0216046	CCL12, STAT1, STAT2, IL21R, CCL2, IIGP1	200	161	20240	3.77143	1	0.285879	0.271039
GO:0001916~positive regulation of T cell mediated cytotoxicity	4	1.85185	0.0222025	H2-T23, H2-T22, B2M, H2-D1	200	61	20240	6.63607	1	0.290853	0.275755
GO:0002687~positive regulation of leukocyte migration	3	1.38889	0.0248755	CCL12, CSF1, CCL2	200	25	20240	12.144	1	0.322643	0.305895
GO:2001187~positive regulation of CD8-positive, alpha-beta T cell activation	3	1.38889	0.0267768	H2-T23, H2-T22, H2-D1	200	26	20240	11.6769	1	0.337285	0.319777
GO:0002715~regulation of natural killer cell mediated immunity	3	1.38889	0.0267768	H2-T23, H2-T22, H2-D1	200	26	20240	11.6769	1	0.337285	0.319777
GO:0001815~positive regulation of antibody-dependent cellular cytotoxicity	3	1.38889	0.0267768	H2-T23, H2-T22, H2-D1	200	26	20240	11.6769	1	0.337285	0.319777
GO:0032759~positive regulation of TRAIL production	3	1.38889	0.0287349	H2-T23, H2-T22, H2-D1	200	27	20240	11.2444	1	0.347846	0.32979
GO:0034142~toll-like receptor 4 signaling pathway	3	1.38889	0.0287349	OAS1A, NMI, PIK3AP1	200	27	20240	11.2444	1	0.347846	0.32979
GO:0002519~natural killer cell tolerance induction	3	1.38889	0.0287349	H2-T23, H2-T22, H2-D1	200	27	20240	11.2444	1	0.347846	0.32979
GO:0002477~antigen processing and presentation of exogenous peptide antigen via MHC class Ib	3	1.38889	0.0287349	H2-T23, H2-T22, H2-D1	200	27	20240	11.2444	1	0.347846	0.32979
GO:2000502~negative regulation of natural killer cell chemotaxis	2	0.925926	0.0292084	CCL12, CCL2	200	3	20240	67.4667	1	0.347846	0.32979
GO:0016078~tRNA catabolic process	2	0.925926	0.0292084	SLFN8, SLFN9	200	3	20240	67.4667	1	0.347846	0.32979
GO:2000779~regulation of double-strand break repair	3	1.38889	0.0307484	YEATS4, DEK, PML	200	28	20240	10.8429	1	0.359646	0.340978
GO:0002717~positive regulation of natural killer cell mediated immunity	3	1.38889	0.0307484	H2-T23, H2-T22, H2-D1	200	28	20240	10.8429	1	0.359646	0.340978
GO:0006915~apoptotic process	13	6.01852	0.0322716	ZBP1, DAXX, SP110, ADAR, PML, IFIT2, PYCARD, AIM2, TNFSF10, SUDS3, XAF1, RNF130, PPIA	200	666	20240	1.97538	1	0.374122	0.354702
GO:2000566~positive regulation of CD8-positive, alpha-beta T cell proliferation	3	1.38889	0.0328162	H2-T23, H2-T22, H2-D1	200	29	20240	10.469	1	0.377098	0.357524
GO:0060907~positive regulation of macrophage cytokine production	3	1.38889	0.0349369	PYCARD, CASP4, TLR3	200	30	20240	10.12	1	0.397977	0.377319
GO:0019731~antibacterial humoral response	5	2.31481	0.0359372	H2-T23, IGHM, H2-T22, B2M, H2-D1	200	126	20240	4.01587	1	0.405842	0.384776
GO:0071407~cellular response to organic cyclic compound	4	1.85185	0.03648	CCL12, STAT1, IL18, CCL2	200	74	20240	5.47027	1	0.408451	0.387249
GO:0010800~positive regulation of peptidyl-threonine phosphorylation	3	1.38889	0.0371094	RPTOR, IGTP, IRGM1	200	31	20240	9.79355	1	0.408515	0.38731
GO:0051259~protein oligomerization	3	1.38889	0.0371094	IFIH1, SLC31A1, OAS1A	200	31	20240	9.79355	1	0.408515	0.38731
GO:0002729~positive regulation of natural killer cell cytokine production	3	1.38889	0.0393324	H2-T23, H2-T22, H2-D1	200	32	20240	9.4875	1	0.42583	0.403726
GO:0036037~CD8-positive, alpha-beta T cell activation	3	1.38889	0.0393324	H2-T23, H2-T22, H2-D1	200	32	20240	9.4875	1	0.42583	0.403726
GO:0006281~DNA repair	9	4.16667	0.0398043	PARP10, DTX3L, TAOK3, XRN2, EYA4, HLTF, TIMELESS, PARP9, SAMHD1	200	391	20240	2.32941	1	0.427407	0.405221
GO:0072332~intrinsic apoptotic signaling pathway by p53 class mediator	3	1.38889	0.0416048	PYCARD, IFI204, PML	200	33	20240	9.2	1	0.439534	0.416719
GO:0042771~intrinsic apoptotic signaling pathway in response to DNA damage by p53 class mediator	3	1.38889	0.0416048	PYCARD, IFI204, PML	200	33	20240	9.2	1	0.439534	0.416719
GO:0010332~response to gamma radiation	3	1.38889	0.0439253	CCL7, CCL2, PML	200	34	20240	8.92941	1	0.460337	0.436442
GO:0045953~negative regulation of natural killer cell mediated cytotoxicity	3	1.38889	0.0462928	H2-T23, H2-T22, H2-D1	200	35	20240	8.67429	1	0.471282	0.446819
GO:0045185~maintenance of protein location	2	0.925926	0.0482075	SP100, LGALS9	200	5	20240	40.48	1	0.471282	0.446819
GO:0000738~DNA catabolic process, exonucleolytic	2	0.925926	0.0482075	ISG20, XRN2	200	5	20240	40.48	1	0.471282	0.446819
GO:0034123~positive regulation of toll-like receptor signaling pathway	2	0.925926	0.0482075	PIK3AP1, TLR3	200	5	20240	40.48	1	0.471282	0.446819
GO:0007084~mitotic nuclear envelope reassembly	2	0.925926	0.0482075	ANKLE2, BANF1	200	5	20240	40.48	1	0.471282	0.446819
GO:0072719~cellular response to cisplatin	2	0.925926	0.0482075	SLC31A1, TIMELESS	200	5	20240	40.48	1	0.471282	0.446819
GO:0071211~protein targeting to vacuole involved in autophagy	2	0.925926	0.0482075	IGTP, IRGM1	200	5	20240	40.48	1	0.471282	0.446819
GO:0035702~monocyte homeostasis	2	0.925926	0.0482075	CSF1, CCL2	200	5	20240	40.48	1	0.471282	0.446819
GO:0010878~cholesterol storage	2	0.925926	0.0482075	SOAT1, NPC2	200	5	20240	40.48	1	0.471282	0.446819
GO:2001238~positive regulation of extrinsic apoptotic signaling pathway	3	1.38889	0.0487062	PYCARD, TNFSF10, PML	200	36	20240	8.43333	1	0.472631	0.448097
GO:0010934~macrophage cytokine production	3	1.38889	0.0511644	PYCARD, CASP4, TLR3	200	37	20240	8.20541	1	0.485691	0.460479
GO:0042270~protection from natural killer cell mediated cytotoxicity	3	1.38889	0.0511644	H2-T23, H2-T22, H2-D1	200	37	20240	8.20541	1	0.485691	0.460479
GO:0032967~positive regulation of collagen biosynthetic process	3	1.38889	0.0511644	PRDX5, IL18, CCL2	200	37	20240	8.20541	1	0.485691	0.460479
GO:0032729~positive regulation of interferon-gamma production	4	1.85185	0.0544475	PYCARD, IL18, ISG15, TLR3	200	87	20240	4.65287	1	0.513138	0.486502
GO:0006979~response to oxidative stress	5	2.31481	0.0550929	USP25, PRDX5, BANF1, NCOA7, ATOX1	200	145	20240	3.48966	1	0.515512	0.488752
GO:1905673~positive regulation of lysosome organization	2	0.925926	0.0575679	IGTP, IRGM1	200	6	20240	33.7333	1	0.516534	0.489721
GO:0061739~protein lipidation involved in autophagosome assembly	2	0.925926	0.0575679	IGTP, IRGM1	200	6	20240	33.7333	1	0.516534	0.489721
GO:0075044~autophagy of host cells involved in interaction with symbiont	2	0.925926	0.0575679	IGTP, IRGM1	200	6	20240	33.7333	1	0.516534	0.489721
GO:0044546~NLRP3 inflammasome complex assembly	2	0.925926	0.0575679	PYCARD, AIM2	200	6	20240	33.7333	1	0.516534	0.489721
GO:0010742~macrophage derived foam cell differentiation	2	0.925926	0.0575679	SOAT1, STAT1	200	6	20240	33.7333	1	0.516534	0.489721
GO:0052548~regulation of endopeptidase activity	2	0.925926	0.0575679	PSMA3, PSMB8	200	6	20240	33.7333	1	0.516534	0.489721
GO:1905168~positive regulation of double-strand break repair via homologous recombination	3	1.38889	0.0587964	ACTR2, TIMELESS, YEATS4	200	40	20240	7.59	1	0.520427	0.493413
GO:0050870~positive regulation of T cell activation	3	1.38889	0.0587964	PYCARD, CCL2, B2M	200	40	20240	7.59	1	0.520427	0.493413
GO:0033209~tumor necrosis factor-mediated signaling pathway	3	1.38889	0.0614227	PYCARD, AIM2, STAT1	200	41	20240	7.40488	1	0.540025	0.511993
GO:0019882~antigen processing and presentation	3	1.38889	0.0640883	IGHM, PSMB8, H2-D1	200	42	20240	7.22857	1	0.559705	0.530651
GO:0032689~negative regulation of interferon-gamma production	3	1.38889	0.0667924	CD274, IRGM1, LGALS9	200	43	20240	7.06047	1	0.572261	0.542556
GO:0007259~JAK-STAT cascade	3	1.38889	0.0667924	IL15RA, STAT1, STAT2	200	43	20240	7.06047	1	0.572261	0.542556
GO:0030578~PML body organization	2	0.925926	0.0668366	DAXX, PML	200	7	20240	28.9143	1	0.572261	0.542556
GO:0008360~regulation of cell shape	5	2.31481	0.068251	CCL12, CCL7, RHOG, CCL2, MYL12B	200	156	20240	3.24359	1	0.576831	0.546889
GO:0030336~negative regulation of cell migration	5	2.31481	0.068251	RAP2C, IFITM3, BST2, SUDS3, SAP30	200	156	20240	3.24359	1	0.576831	0.546889
GO:0002486~antigen processing and presentation of endogenous peptide antigen via MHC class I via ER pathway, TAP-independent	3	1.38889	0.0695339	H2-T23, H2-T22, H2-D1	200	44	20240	6.9	1	0.583906	0.553597
GO:0016525~negative regulation of angiogenesis	4	1.85185	0.0741044	CXCL10, STAT1, CCL2, PML	200	99	20240	4.08889	1	0.618324	0.586227
GO:0002476~antigen processing and presentation of endogenous peptide antigen via MHC class Ib	3	1.38889	0.075125	H2-T23, H2-T22, H2-D1	200	46	20240	6.6	1	0.62237	0.590064
GO:1905563~negative regulation of vascular endothelial cell proliferation	2	0.925926	0.0760147	CCL12, CCL2	200	8	20240	25.3	1	0.62237	0.590064
GO:0061762~CAMKK-AMPK signaling cascade	2	0.925926	0.0760147	IGTP, IRGM1	200	8	20240	25.3	1	0.62237	0.590064
GO:0071902~positive regulation of protein serine/threonine kinase activity	3	1.38889	0.0808539	RPTOR, IGTP, IRGM1	200	48	20240	6.325	1	0.65788	0.62373
GO:0012501~programmed cell death	3	1.38889	0.0837678	ZBP1, CASP4, RNF130	200	49	20240	6.19592	1	0.671595	0.636734
GO:1901098~positive regulation of autophagosome maturation	2	0.925926	0.0851029	IGTP, IRGM1	200	9	20240	22.4889	1	0.671595	0.636734
GO:0043615~astrocyte cell migration	2	0.925926	0.0851029	CCL12, CCL2	200	9	20240	22.4889	1	0.671595	0.636734
GO:0034351~negative regulation of glial cell apoptotic process	2	0.925926	0.0851029	CCL12, CCL2	200	9	20240	22.4889	1	0.671595	0.636734
GO:0090140~regulation of mitochondrial fission	2	0.925926	0.0851029	STAT2, IRGM1	200	9	20240	22.4889	1	0.671595	0.636734
GO:0050776~regulation of immune response	3	1.38889	0.0867133	FCGR1, SPPL2A, PHF11A	200	50	20240	6.072	1	0.680206	0.644898
GO:0043330~response to exogenous dsRNA	3	1.38889	0.0896896	STAT1, SLC3A2, TLR3	200	51	20240	5.95294	1	0.699366	0.663063
GO:0032753~positive regulation of interleukin-4 production	3	1.38889	0.0926958	H2-T23, H2-T22, H2-D1	200	52	20240	5.83846	1	0.712566	0.675578
GO:0060333~interferon-gamma-mediated signaling pathway	2	0.925926	0.0941022	STAT1, NMI	200	10	20240	20.24	1	0.712566	0.675578
GO:0032606~type I interferon production	2	0.925926	0.0941022	IRF7, TLR3	200	10	20240	20.24	1	0.712566	0.675578
GO:2001056~positive regulation of cysteine-type endopeptidase activity	2	0.925926	0.0941022	PYCARD, AIM2	200	10	20240	20.24	1	0.712566	0.675578
GO:0042118~endothelial cell activation	2	0.925926	0.0941022	CXCL10, PPIA	200	10	20240	20.24	1	0.712566	0.675578
GO:0032755~positive regulation of interleukin-6 production	4	1.85185	0.0984153	IFIH1, PYCARD, LGALS9, TLR3	200	112	20240	3.61429	1	0.740943	0.702482
