# Supplementary material for: PARK7/DJ-1 deficiency impairs microglial activation in response to LPS-induced inflammation
Source: J Neuroinflammation. 2024 Jul 16;21:174. doi: 10.1186/s12974-024-03164-x (PMC11253405; doi:10.1186/s12974-024-03164-x)
Supplement: Supplementary file 11 — Supplementary Material 11. [file 12974_2024_3164_MOESM11_ESM.xlsx]

## Sheet: DEGs
Table S5
Up- and down-regulated genes (p-value < 0.05, |log2FC| ≥ 0.5)
DEGs up DJ-1 KO vs WT	DEGs down DJ-1 KO vs WT	DEGs up DJ-1 KO LPS vs WT LPS	DEGs down DJ-1 KO LPS vs WT LPS
Mir98	Park7	Rn18s-rs5	Park7
Gm55762	Ifi214	mt-Rnr2	Tnfrsf9
Gm48898	Rn7s6	Catsperd	Gm42984
Sytl1	Cxcl9	Lars2	Batf2
Mefv	Colec11	Gm48958	Serpina3g
Met	Gm34220	Apol8	Hbb-bs
Dlk1	Xist	Pwwp2b	Zdhhc12
Fyb2	Slc12a3	Tceal1	Ciita
Scg2	4933427D14Rik	Gm15564	Gm11175
Snhg7os	Mir6897	Cacna1a	Gm37376
Tns4	Gm49167	Gm14169	Card11
Gm7846	B230208H11Rik	Cd209g	Igha
Col13a1	Tyw5	Gm12592	BE692007
Lhx3	Ptch2	Gm13205	Prf1
8030474K03Rik	Gm24265	Gm568	Gm17661
Gm6055	1700001G11Rik	Gm38832	Gm44170
Gm8188	AA914427	G530011O06Rik	Cdkn3
Arhgap8	Gm10812	Nav2	Ifng
Gm47727	Gm47525	Dcdc2b	Zfp771
Klc3	Gm12367	Gm4793	Bicra
Cnksr1	1700061A03Rik	Atp8a2	Ifi27l2a
Sdhaf4	Rab10os	Gm13166	Gm44620
Gm6206	Gm36279	Prkca	Gm15931
Snord88c	Gm25099	Ildr1	Gm8185
Gm55611	Gm30698	C2cd4c	Gm43843
Rassf7	Gm9733	Gm43837	Wdr62
Sult1c1	Gm24407	Atp6v0a1	Samhd1
Brd8dc	Gm12764	mt-Rnr1	Gm38158
Gdf7	Plet1os	Pnpla3	Ascl4
Gm24620	Gm3625	Lmnb1	Xist
Mterf1a	Gm38271	Agmo	Ube2c
Elf3	Gm50240	Gm4617	Alas2
Adamts13	1700037C18Rik	Gm55228	Cdk19os
Sele	Gm50019	Atxn1	Gm37964
Muc15	Gm4129	Gm55840	Ccl22
Gm47047	Zp1	Gm13610	Igkc
Gm15475	Tcf19	Ung	Gm44735
Pabpc1l	Gm44064	9230114K14Rik	Gm45606
Gm9727	Gm47196	Rasgef1b	H2bc7
Gm23472	Gm45112	Gstp2	Ms4a8a
Gm11110	Gm15327	Tmed10-ps	Gm6767
Gcat	1600023N17Rik	Ablim1	Gm16712
Vmn2r86	Gm26586	Zfp991	Gm48734
Mrgpra2b	Sfrp4	Gm26802	Xpa
Nkpd1	Mrps18c	Gm32514	Cytl1
4933430I17Rik	Ppp4r1l-ps	Gm34983	Gm9823
Orm1	Gm9725	Plxna4	Tcf15
Gm35550	Alms1-ps1	Gm10463	Foxd2os
Gm13724	Bola1	Gm10275	Ido1
Dlx6	Snora78	Galnt3	Asb5
Ttc39a	Gm20496	Gm37697	Gm38114
Gm52965	Pole2	Cdk6	Abhd1
Gm56174	Gm10390	Gm46404	Pcbd2
Clec4a4	Gm45546	Hspa1l	Sox30
Gm4779	Gm48147	Gm12184	H2-Aa
Gm10435	5033430I15Rik	Mir7015	Gja5
Gm28499	Zc3h12d	Gm48881	Mir212
Nphp4	Gm33467	Gm13268	9030612E09Rik
Gm16580	Mmp3	Bend6	Rasl2-9
Lrg1	1700013A02Rik	Slc23a3	Gm15634
Tpm3-rs7	D930015M05Rik	Mid1-ps1	Gm20721
Gm47159	A730020M07Rik	Nanos1	Zfp30
Snora19	Leng9	Gm47737	Gm17823
Pomc	Gm5655	Lrrc36	Trp53i13
Gm11701	Gm45133	Hdhd3	Gm9985
Ces1d	Gm24830	Sh3pxd2a	Gm28417
Gm4332	4930532G15Rik	Gm43590	Klri2
Sycp3	Gm16024	Piwil2	Gm10819
Gm9465	Gm48737	Bach1	Kmt5c
Gm15689	Gm28035	AI197445	5830444B04Rik
Elapor1	Gm19510	Gm12306	2610028D06Rik
Rem2	Gm37634	S1pr4	Gm5117
Erich2	Gm6900	Lrrc3b	Gm37827
Cgn	AF357399	Fkbp1b	H4c9
2810407A14Rik	5430430B14Rik	Gm56193	Gm55606
Gm40477	2600006K01Rik	Pnpla1	Tgtp2
Spdya	Gm36862	Hivep2	A930029G22Rik
Gm8494	Gm22068	Aldh3b2	Gm54787
Epcam	Il5ra	Prr5l	Gm45845
Aurkb	AU021063	Gm12844	Mrgpre
Ccdc116	Gm5668	Lrrc52	Gbp8
6430571L13Rik	Uba52	Gpa33	Cpt1b
Gm37953	Gm17147	Gm37581	Sp3os
Gm6563	Acot7	Ppp1r14c	Gm16044
6330415G19Rik	Gm50336	Hip1	Mlph
Capn11	Gm15246	Fosb	Gm9967
Rnf39	Gm7511	Gm44037	Slco2a1
3425401B19Rik	Snhg5	Smim10l2a	Abcg3
Gm45262	Gm49405	1700016G22Rik	4930577N17Rik
Npy2r	6030443J06Rik	Gm29454	Pvrig-ps
Acot4	Gm16168	Aloxe3	Gm10817
Gm18337	Tex22	Pnma8a	Gm43621
Gm13189	Gm26628	Ccr6	Gm43502
Gm7399	Gm10209	Cd276	Prss16
Chrne	Gm37842	Gm16386	H2ac10
D130043K22Rik	H2ac6	Gm45053	Gm20496
2310043M15Rik	Gm37925	Gm42031	Gm13201
Gm12892	Gm26800	Upk1b	Gm36486
Gm13422	Gm807	Rpl21-ps1	Gm7390
Actn2	D830025C05Rik	Trim30c	Atp8b5
Gemin4	Snhg9	Rtl4	CN725425
Gm6807	AU022754	Prokr1	Haus4
Gm4335	Kcnk7	Gm2449	Gm26682
	Gm29340	Mid1	Ccl17
	Gm49785	Glt1d1	Gm28529
	6430562O15Rik	F630040K05Rik	4931422A03Rik
	Lao1	Gm37522	Gm43858
	Gm26448	Stkld1	Gm12472
	Gm4221	Mir6541	Gm42946
	Gm37125	Pdgfb	Gm7862
	Tnfrsf9	Gm38001	Gm49004
	Gm36161	Gm45370	Siglec1
	Artn	Gm7370	Gm23054
	Gm24514	Gm7818	Htr5b
	Gm12862	Pip5kl1	Mexis
	E130208F15Rik	Iqcn	Sla2
	Gm54908	Tnnt3	Cracr2b
	A730061H03Rik	Mylpf	Kcnk12
	H4f16	Gm37626	Runx3
	Ctla4	Gm43172	Zbtb11os1
	Gm47242	Col11a2	Gm10160
	BC026513	Gm6206	Gm36584
	Gm18190	Lnx1	Gm13283
	Gm17216	Bank1	Gm44712
	Tacr1	Gm13431	Gm44926
	Gm50324	Abcb6	Spx
	A830035O19Rik	Arhgap19	Gm37678
	Dynlt1a	Hs3st2	Gm17163
	9330020H09Rik	Mir5107	Gm13410
	AY074887	Zfp879	Gm4841
	Shisa3	Cacng3	Gm43594
	Gm42567	Pbdc1	Gm19684
	Gm43682	Gm36899	Mpo
	Gm50455	Gm56054	H2bc13
	Gm26887	Bnc2	Tmem154
	Gm47862	Impa2	Spn
	Gm43799	Gm37176	Dnase1l3
	E030037K01Rik	Nr4a2	Ncr1
	Ccdc63	Cd300c	8030423J24Rik
	Gm22513	Gm37168	0610039K10Rik
	Gm15420	Olfr1328	Mterf1a
	Tmem82	Gm46999	Gm25661
	Gpt	Rimbp3	Gm16156
	Gm24727	4930590J08Rik	Gm48435
	Tulp2	Gm3667	Gm55822
	Cpne1	Nudt10	Serpina3f
	Gm47254	Gm14233	3110021N24Rik
	H2bc9	Gpr173	Gm48398
	Gm49312	Gm37078	Rasl11a
	Gm37268	Cd164l2	Gm11814
	Gm5931	1110013H19Rik	Gm27206
	Saa2	Ptges3-ps	Tigit
	Hsd3b7	1700001K19Rik	Gm20109
	Zfp82	Gm45778	Dhx58os
	Gm24336	Gm52988	Mustn1
	Gm49625	Chaf1b	Plk1
	Gm26827	Cfhr2	6430573P05Rik
	Snora31	Gm14810	Tmem42
	Gm26287	Gm23995	Gm11439
	Shcbp1l	Txnrd1	Gm49614
	Gm49751	Tmem230	Clec4b1
	Vdr	Gm5790	Gm48876
	Gm22009	Gm43111	Jchain
	Gm10766	Cd83	Gm20063
	Jaml	Gm17200	AI849053
	Gm20371	Gm16287	Gm4598
	Gm25848	Gen1	Gpnmb
	Gm21178	Gm43581	Gm26759
	Gm48780	Gm38413	Gm45095
	Has3	Ccdc192	A930002C04Rik
	6720482G16Rik	Eldr	Gm3558
	Gm43182	Gm37457	Gm45244
	Gm25492	Irs4	Gm20634
	5330439K02Rik	Gm10344	Gm15655
	Gm37522	Apaf1	Gm53028
	Hmgn2-ps	Klrd1	Gm42615
	Gm13620	Slc2a5	Tfap2b
	A930029G22Rik	1700012D16Rik	Adap2os
	Gm53041	2810049E08Rik	Gm44647
	Gm47731	Gm43585	AY036118
	Klrd1	Cd5	Rpsa-ps7
	Gm7457	Gm28229	Cxcr6
	Rnu1a1	Gm49701	Nr1h3
	Clca3a1	Rasd2	Selp
	Ephb2	Dscc1	AW112010
	Gm9484	Olfr1342	Scube2
	Gm44672	Stpg4	E130102H24Rik
	Gm20634	Gm47095	Avpi1
	Gm32282	Gm14121	Gm8091
	Mir8102	Gm44957	Mir328
	Gm15842	Gm8817	Stc2
	U2af1l4	Tincr	Gm54908
	Gm10322	Gm42427	Exd1
	Gm24888	Gm8437	Krt7
	Glcci1	Tspan18	Gm13096
	Gm4540	Gm32950	Sh2d1b1
	H2bc22	Gm38144	Ftl1-ps1
	Gm52988	Actr3-ps	Gm55332
	4930413G21Rik	Gm28294	Tmem150b
	Gm43281	Ddias	Gypa
	Gm45855	Npy5r	Gm44709
	4933424G06Rik	Gla	Gm11753
	Gm18763	Gm10517	Gm9939
	4930549G23Rik	Plek	BC022960
	Gm23969	Best2	Gm16213
		Rslcan18	Scn11a
		Gm32688	AV099323
		Gm44178	H2bc3
		Gm37463	Gm19582
		Gm13680	Ubb-ps
		Gm12972	Gm12743
		Tbx19	Ccdc152
		Mir7073	Gpr141
		Lmx1b	Gm26634
		Gm6556	5930411N13Rik
		Gm38699	H2bc11
		Gm10699	Gm36858
		Scn5a	Gm56257
		C030010L15Rik	Tmc5
		6530403H02Rik	Gm5230
		Gm43148	4930513N10Rik
		Xkr9	Gm22009
		Atf1-ps	Gm49266
		Ccno	Shroom1
		Gm49593	Tex11
		Gm24655	Areg
		Slc12a1	1700018A14Rik
			Slamf7
			Gm6170
			Gm37534
			Gm38319
			Gm37953
			Gm22060
			Gm11575
			Gm38146
			Gm26236
			Fanca
			Baiap2l2
			Gm16759
			Rpl36-ps2
			Gm25081
			S100a4
			Gm10642
			Npb
			5430402O13Rik
			Pigz
			Cd200r4

## Sheet: DJ-1 KO vs WT up BP
Term		Count	PValue	Genes	List Total	Pop Hits	Pop Total	Fold Enrichment	Bonferroni	Benjamini	FDR
GO:0030855	epithelial cell differentiation	4	0.00205441	ELF3, CES1D, DLX6, GDF7	48	108	20119	15.52391975308642	0.5723042842180665	0.8484705327961183	0.8484705327961183
GO:0009790	embryo development	3	0.0126333	ELF3, DLX6, DLK1	48	73	20119	17.22517123287671	0.9947565907096537	1.0	1.0
GO:0021527	spinal cord association neuron differentiation	2	0.0299561	LHX3, GDF7	48	13	20119	64.48397435897435	0.9999964936886112	1.0	1.0
GO:0050918	positive chemotaxis	2	0.0412422	SCG2, MET	48	18	20119	46.57175925925926	0.9999999720889781	1.0	1.0
GO:0030198	extracellular matrix organization	3	0.069452	ADAMTS13, COL13A1, ELF3	48	185	20119	6.79695945945946	0.9999999999998772	1.0	1.0
GO:0055013	cardiac muscle cell development	2	0.0699882	ACTN2, MET	48	31	20119	27.041666666666664	0.9999999999999032	1.0	1.0
GO:0006637	acyl-CoA metabolic process	2	0.0721642	CES1D, ACOT4	48	32	20119	26.196614583333332	0.9999999999999633	1.0	1.0
GO:0048754	branching morphogenesis of an epithelial tube	2	0.0786622	MET, GDF7	48	35	20119	23.951190476190476	0.999999999999998	1.0	1.0

## Sheet: DJ-1 KO vs WT down BP
Term		Count	%	PValue	Genes	List Total	Pop Hits	Pop Total	Fold Enrichment	Bonferroni	Benjamini	FDR
GO:1904782	negative regulation of NMDA glutamate receptor activity	2	1.42857	0.00703982	PARK7, EPHB2	49	3	20408 277.6598639455782		0.956576	1	1
GO:0045606	positive regulation of epidermal cell differentiation	2	1.4	0.0163508	SFRP4, PTCH2	49	7	20408 118.99708454810494		1	1	1
GO:0008285	negative regulation of cell proliferation	5	3.6	0.0187964	SFRP4, H2AC6, VDR, TNFRSF9, AY074887	49	434	20408 4.798269538230039		1	1	1
GO:0002376	immune system process	5	3.57143	0.0429319	COLEC11, JAML, MMP3, CTLA4, KLRD1	49	563	20408 3.698843658244826		1	1	1
GO:0006508	proteolysis	5	3.57143	0.0541764	COLEC11, MMP3, CPNE1, PARK7, CLCA3A1	49	608	20408 3.425080558539205		1	1	1

## Sheet: DJ-1 KO LPS vs WT LPS up BP 
Term		Count	PValue		Genes	List Total	Pop Hits	Pop Total	Fold Enrichment	Bonferroni	Benjamini	FDR
GO:0051899	membrane depolarization	3	0.00916609	2.03782	CACNA1A, SCN5A, BEST2	98	30	20119	20.529591836734692	0.999555	1.0	1.0
GO:0007165	signal transduction	14	0.0163503	1.78647	PPP1R14C, NPY5R, ARHGAP19, IRS4, RASD2, PROKR1, GPR173, CDK6, IMPA2, BANK1, HIVEP2, CCR6, S1PR4, PLXNA4	98	1395	20119	2.0603174603174605	0.999998999305932	1.0	1.0
GO:0097190	apoptotic signaling pathway	3	0.043806	1.35847	HIP1, APAF1, CD5	98	69	20119	8.925909494232476	1.0	1.0	1.0
GO:0048661	positive regulation of smooth muscle cell proliferation	3	0.0647825	1.18854	NPY5R, PDGFB, PRKCA	98	86	20119	7.161485524442336	1.0	1.0	1.0
GO:0055085	transmembrane transport	6	0.0681037	1.16683	SLC23A3, ABCB6, SLC12A1, CACNA1A, SCN5A, SLC2A5	98	453	20119	2.7191512366536017	1.0	1.0	1.0
GO:0051122	hepoxilin biosynthetic process	2	0.0699528	1.1552	GSTP2, ALOXE3	98	15	20119	27.372789115646256	1.0	1.0	1.0
GO:0021953	central nervous system neuron differentiation	2	0.0699528	1.1552	NR4A2, CACNA1A	98	15	20119	27.372789115646256	1.0	1.0	1.0
GO:0006811	ion transport	7	0.0704762	1.15196	SLC12A1, CACNA1A, SCN5A, BEST2, CACNG3, LRRC52, ATP6V0A1	98	601	20119	2.391133824578084	1.0	1.0	1.0
GO:0019433	triglyceride catabolic process	2	0.0877742	1.05663	PNPLA3, PNPLA1	98	19	20119	21.610096670247042	1.0	1.0	1.0
GO:0070528	protein kinase C signaling	2	0.0877742	1.05663	PLEK, PDGFB	98	19	20119	21.610096670247042	1.0	1.0	1.0
GO:0051402	neuron apoptotic process	3	0.0884086	1.05351	NR4A2, APAF1, CACNA1A	98	103	20119	5.979492767980979	1.0	1.0	1.0
GO:0001933	negative regulation of protein phosphorylation	3	0.0913366	1.03936	PIP5KL1, PRKCA, PRR5L	98	105	20119	5.865597667638484	1.0	1.0	1.0

## Sheet: DJ-1 KO LPS vs WT LPS down BP
Term		Count	%	PValue	Genes	List Total	Pop Hits	Pop Total	Fold Enrichment	Bonferroni	Benjamini	FDR
GO:0002250	adaptive immune response	8	4.27807	0.00117699	IFNG, SLAMF7, SH2D1B1, SLA2, SERPINA3G, H2-AA, GM13283, JCHAIN	108	307	20408	4.92412	0.637656	0.619445	0.619445
GO:0042832	defense response to protozoan	4	2.13904	0.00169426	BATF2, TGTP2, GBP8, IFNG	108	45	20408	16.7967	0.768157	0.619445	0.619445
GO:0042130	negative regulation of T cell proliferation	4	2.13904	0.00286223	SPN, GPNMB, H2-AA, IDO1	108	54	20408	13.9973	0.915481	0.619445	0.619445
GO:0006334	nucleosome assembly	5	2.6738	0.00287446	H2BC13, H2BC7, H4C9, H2BC3, H2BC11	108	112	20408	8.43585	0.91637	0.619445	0.619445
GO:0006954	inflammatory response	8	4.27807	0.00617284	SELP, CIITA, CCL22, SCN11A, CXCR6, PARK7, CCL17, IDO1	108	414	20408	3.65146	0.995192	1	1
GO:0050868	negative regulation of T cell activation	3	1.60428	0.00755191	SPN, GPNMB, TIGIT	108	25	20408	22.6756	0.998547	1	1
GO:0043434	response to peptide hormone	4	2.13904	0.0085944	SERPINA3F, STC2, SERPINA3G, AREG	108	80	20408	9.44815	0.999413	1	1
GO:0002376	immune system process	9	4.81283	0.00958266	IGKC, SLAMF7, SH2D1B1, SLA2, SERPINA3G, SAMHD1, H2-AA, CARD11, IDO1	108	563	20408	3.02072	0.999752	1	1
GO:0032609	interferon-gamma production	3	1.60428	0.0195507	SPN, SH2D1B1, RUNX3	108	41	20408	13.8266	1	1	1
GO:0071346	cellular response to interferon-gamma	4	2.13904	0.0231678	CIITA, GBP8, CCL22, CCL17	108	116	20408	6.51596	1	1	1
GO:0050776	regulation of immune response	3	1.60428	0.0283326	SPN, IFNG, CARD11	108	50	20408	11.3378	1	1	1
GO:0006959	humoral immune response	3	1.60428	0.0304626	IFNG, GM13283, JCHAIN	108	52	20408	10.9017	1	1	1
GO:0070098	chemokine-mediated signaling pathway	3	1.60428	0.0304626	CCL22, CXCR6, CCL17	108	52	20408	10.9017	1	1	1
GO:0006952	defense response	4	2.13904	0.0354398	TGTP2, GM4841, MPO, IDO1	108	137	20408	5.51717	1	1	1
GO:0051712	positive regulation of killing of cells of other organism	2	1.06952	0.0361343	IFNG, PRF1	108	7	20408	53.9894	1	1	1
GO:0051607	defense response to virus	5	2.6738	0.0396182	NCR1, IFNG, PRF1, SAMHD1, GM13283	108	244	20408	3.87219	1	1	1
GO:0006979	response to oxidative stress	4	2.13904	0.041543	STC2, XPA, PARK7, MPO	108	146	20408	5.17707	1	1	1
GO:0032615	interleukin-12 production	2	1.06952	0.0462186	IFNG, IDO1	108	9	20408	41.9918	1	1	1
GO:0070234	positive regulation of T cell apoptotic process	2	1.06952	0.0462186	SIGLEC1, IDO1	108	9	20408	41.9918	1	1	1
GO:0042098	T cell proliferation	3	1.60428	0.049597	SPN, IFNG, IDO1	108	68	20408	8.3366	1	1	1
GO:1902732	positive regulation of chondrocyte proliferation	2	1.06952	0.0512216	SCUBE2, MUSTN1	108	10	20408	37.7926	1	1	1
GO:0002062	chondrocyte differentiation	3	1.60428	0.0522294	MUSTN1, CYTL1, RUNX3	108	70	20408	8.09841	1	1	1
GO:0042110	T cell activation	3	1.60428	0.0590217	SLAMF7, SLA2, CARD11	108	75	20408	7.55852	1	1	1
GO:0045348	positive regulation of MHC class II biosynthetic process	2	1.06952	0.0611495	CIITA, IFNG	108	12	20408	31.4938	1	1	1
GO:0006955	immune response	7	3.74332	0.06385	CLEC4B1, CCL22, IFNG, CXCR6, H2-AA, CCL17, GM13283	108	538	20408	2.45863	1	1	1
GO:0042102	positive regulation of T cell proliferation	3	1.60428	0.0675484	SPN, IFNG, CARD11	108	81	20408	6.99863	1	1	1
GO:0034097	response to cytokine	3	1.60428	0.0690072	SELP, SERPINA3F, SERPINA3G	108	82	20408	6.91328	1	1	1
GO:0030593	neutrophil chemotaxis	3	1.60428	0.0690072	CCL22, IFNG, CCL17	108	82	20408	6.91328	1	1	1
GO:0060840	artery development	2	1.06952	0.0758489	SCN11A, MEXIS	108	15	20408	25.1951	1	1	1
GO:2001256	regulation of store-operated calcium entry	2	1.06952	0.0855215	CRACR2B, STC2	108	17	20408	22.2309	1	1	1
GO:0031640	killing of cells of other organism	3	1.60428	0.0985365	CCL22, PRF1, CCL17	108	101	20408	5.61276	1	1	1
